# Supplementary material for: Pyrazolobenzothiazine-based carbothioamides as new structural leads for the inhibition of monoamine oxidases: design, synthesis, in vitro bioevaluation and molecular docking studies
Source: Royal Society of Chemistry journal article supplement (doi:10.1039/c6md00570e), 2017-01-01
Supplement: c6md00570e1.pdf [file c6md00570e1.pdf]

**Pyrazolobenzothiazine-based carbothioamides as new structural leads for the inhibition of monoamine oxidases: design, synthesis, *in-vitro* bioevaluation and molecular docking studies**

Syed Mobasher Ali Abid<sup>†a</sup>, Sana Aslam<sup>†b,c</sup>, Sumera Zaib<sup>a</sup>, Syeda Mahwish Bakht<sup>a</sup>, Matloob Ahmad<sup>d</sup>, Muhammad Makshoof Athar<sup>c</sup>, John M Gardiner<sup>e,\*</sup>, Jamshed Iqbal<sup>a,\*</sup>

<sup>a</sup>*Centre for Advanced Drug Research, COMSATS Institute of Information Technology, Abbottabad-22060, Pakistan.*

<sup>b</sup>*Department of Chemistry, Government College Women University, Faisalabad-38000, Pakistan.*

---

<sup>d</sup>*Department of Chemistry, Government College University, Faisalabad-38000, Pakistan.*

<sup>e</sup>*School of Chemistry and Manchester Institute of Biotechnology, University of Manchester, Manchester M1 7DN, UK.*

<sup>†</sup>*These authors contributed equally to this work.*

**\*Correspondence address:**

Tel.: +44 161 306 4530 (J.M. Gardiner); Tel: +92 992 383591 96; Fax: +92 992 383441 (J. Iqbal) E-mail address: gardiner@manchester.ac.uk (J.M. Gardiner); drjamshed@ciit.net.pk & jamshediqb@googlemail.com (J. Iqbal).

# Compound 3a : $^1\text{H}$ NMR

MTMS1

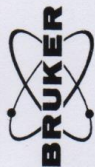

Current Data Parameters  
 NAME Desc06-2011-JMG  
 EXPNO 30  
 PROCNO 1  
 F2 - Acquisition Parameters  
 Date\_ 20111206  
 Time 17.41  
 INSTRUM spect  
 PROBRD 5 mm Multinucl  
 PULPROG zgpg30  
 TD 65536  
 SOLVENT DMSO  
 NS 16  
 DS 2  
 SWH 8278.146 Hz  
 FIDRES 0.126314 Hz  
 AQC 3.9584243 sec  
 RG 256  
 DW 60.400 usec  
 DE 6.00 usec  
 TE 300.2 K  
 D1 1.00000000 sec  
 TDO 1  
 CHANNEL f1  
 NUC1  $^1\text{H}$   
 P1 10.00 usec  
 PL -0.10 dB  
 SF01 400.1324710 MHz  
 F2 - Processing parameters  
 SI 32768  
 SF 400.1300000 MHz  
 WDM EM  
 SSB 0  
 LB 0.30 Hz  
 GB 0  
 PC 1.00

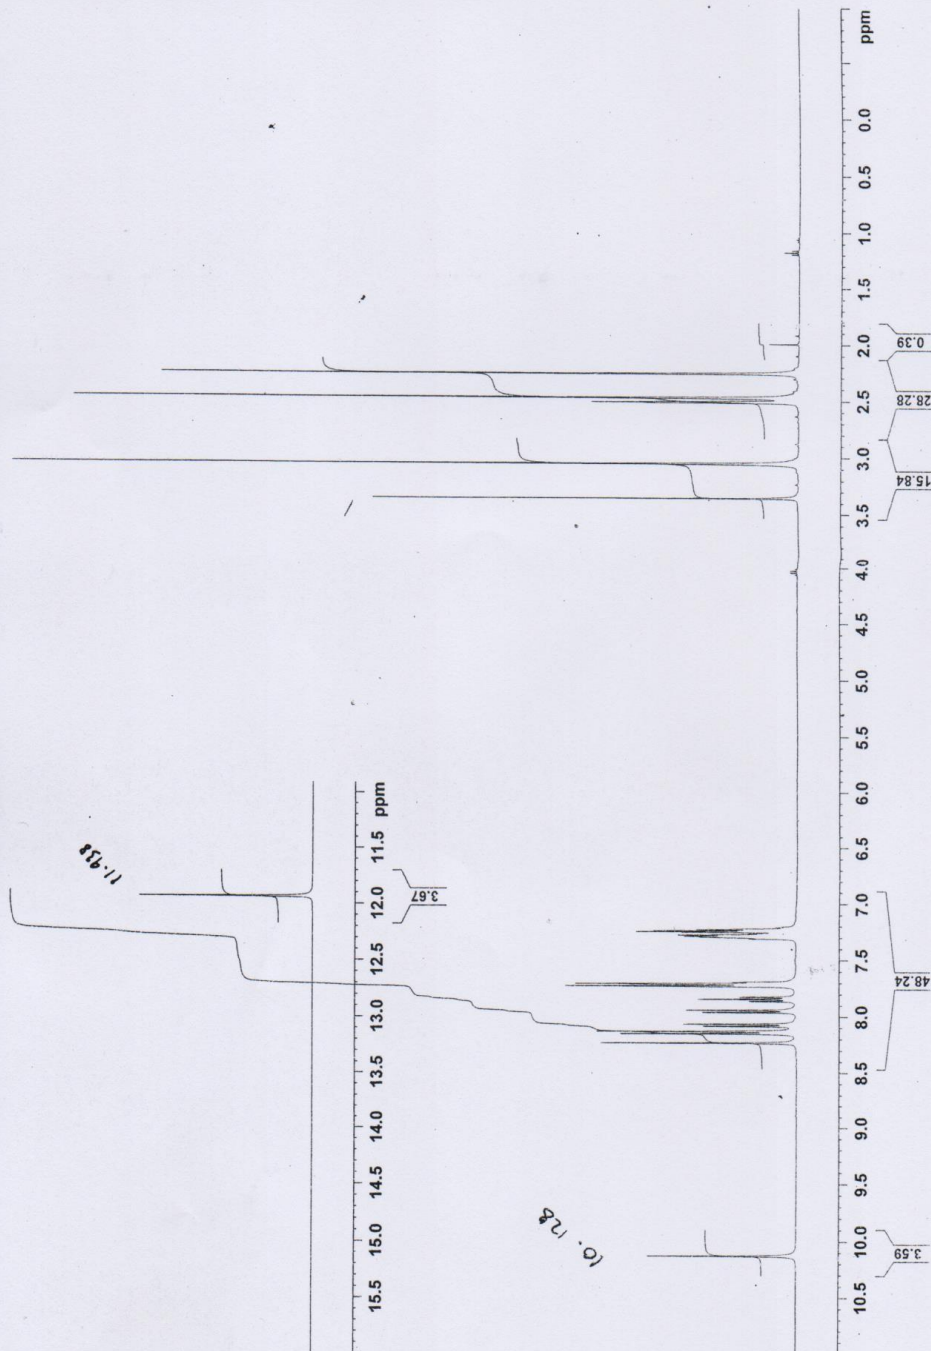

# Compound 3a : <sup>13</sup>C NMR

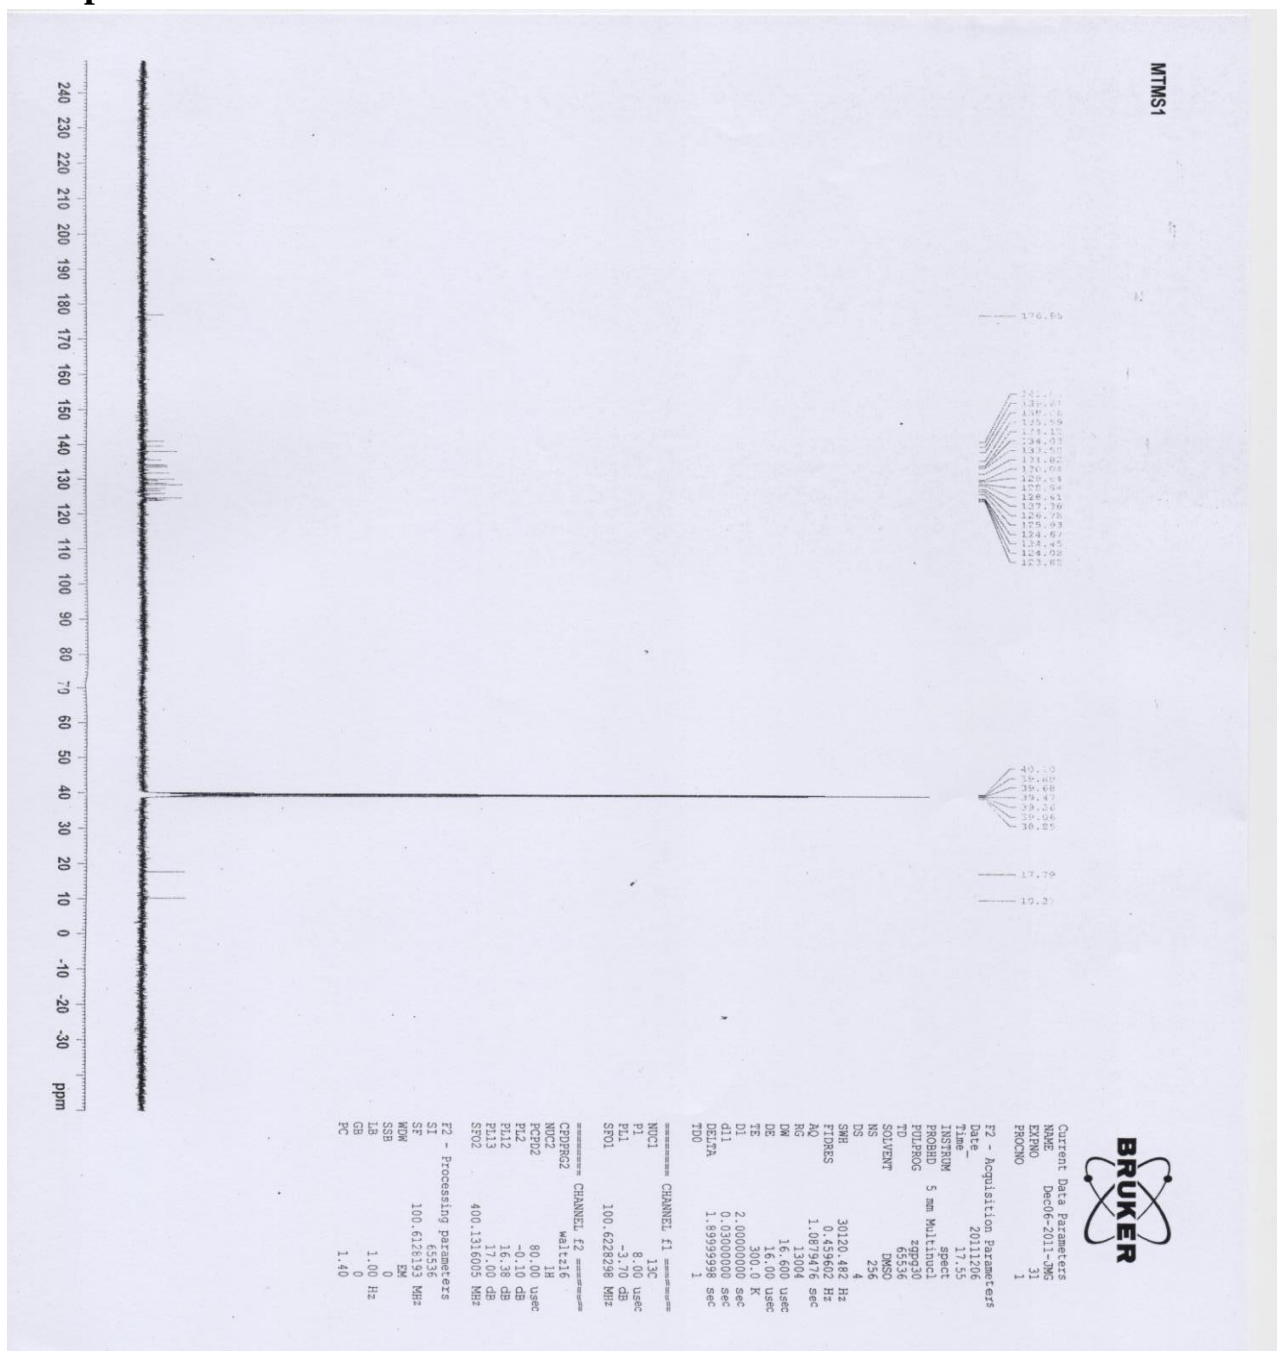

University of Manchester  
1211243B 24 (1.465)

Aslam MTMS-1 3a

cone =30V  
Scan ES-  
1.11e4

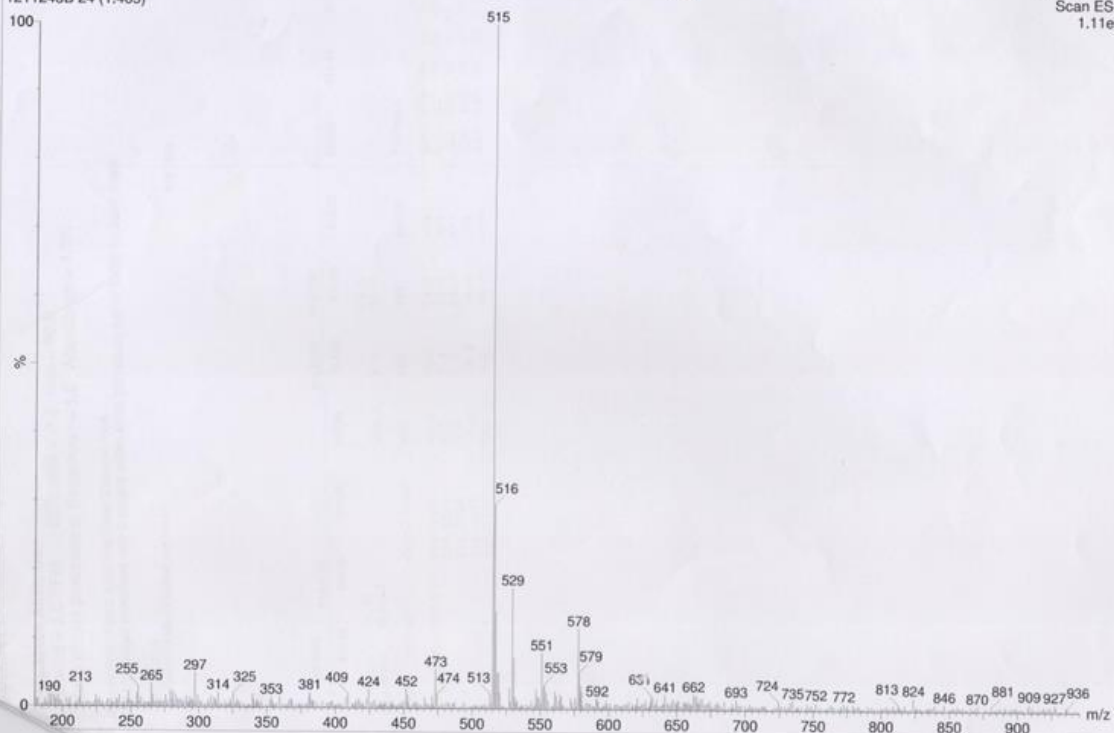

# Compound 3a : HRMS

## Elemental Composition Report 3a

Page 1

### Single Mass Analysis

Tolerance = 5.0 PPM / DBE: min = -1.5, max = 50.0

Isotope cluster parameters: Separation = 1.0 Abundance = 1.0%

Monoisotopic Mass, Odd and Even Electron Ions

676 formula(e) evaluated with 5 results within limits (all results (up to 1000) for each mass)

Aslam MTMS-1  
1211464HnAFAMM 44 (0.699) Cm (42.44)

Cone= 30V  
1: TOF MS ES-  
53.4

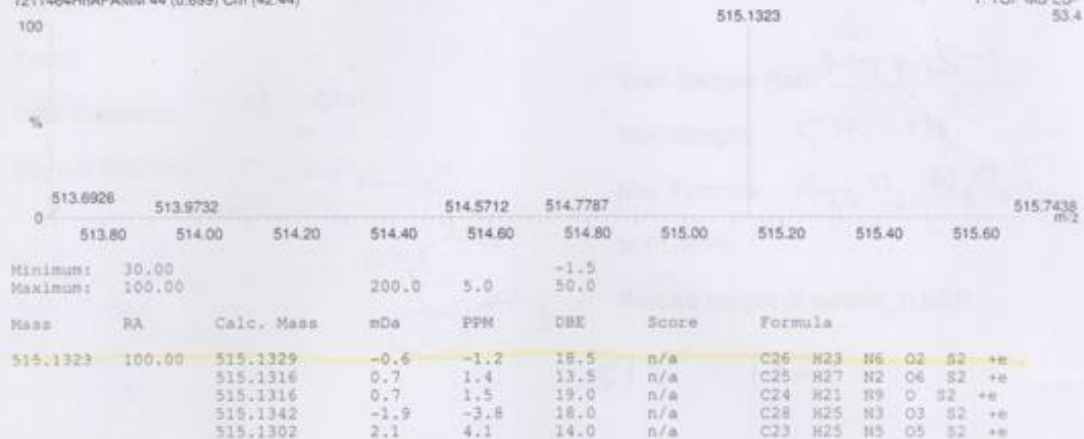

# Compound 3b : <sup>1</sup>H NMR

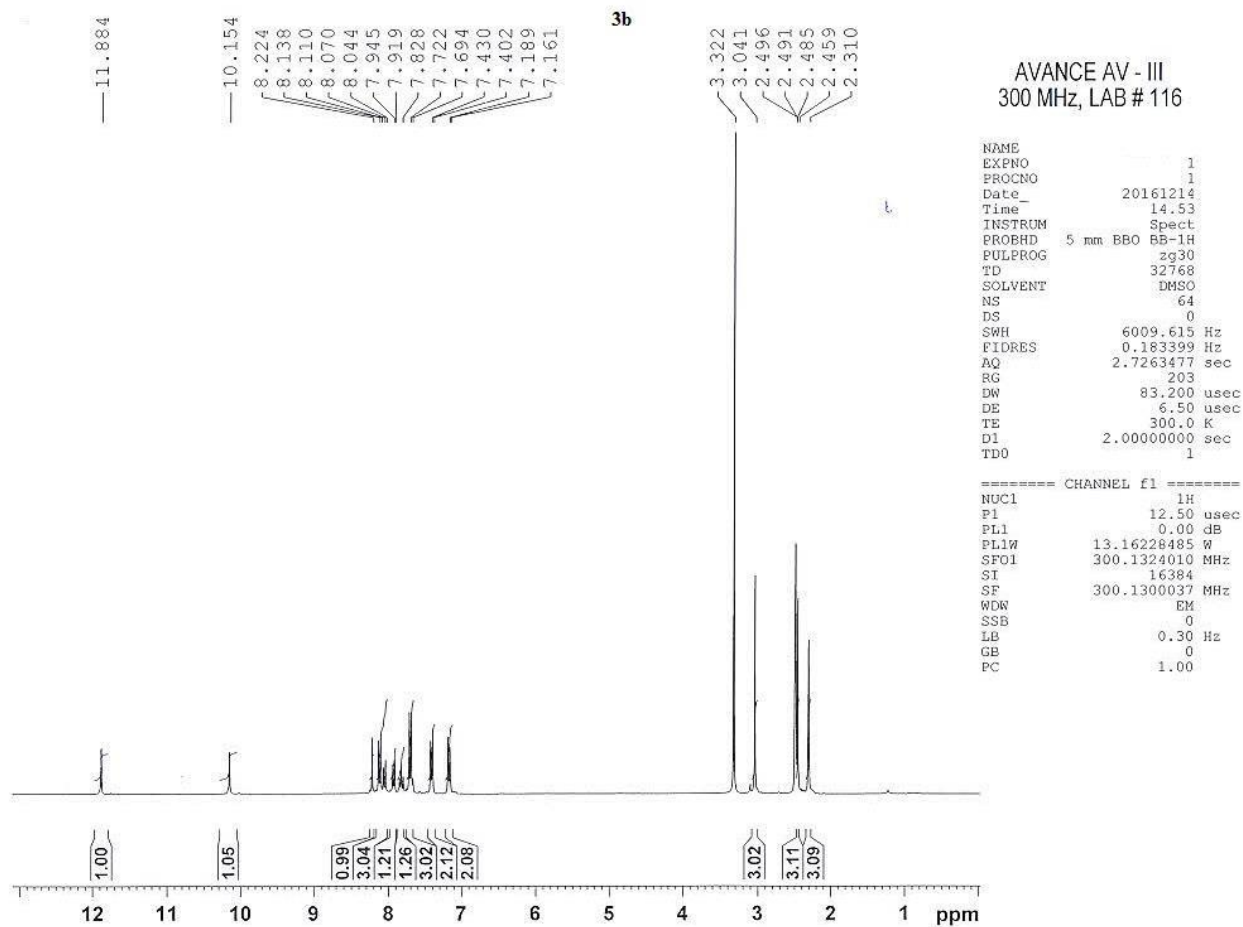



# Compound 3b : <sup>13</sup>C NMR

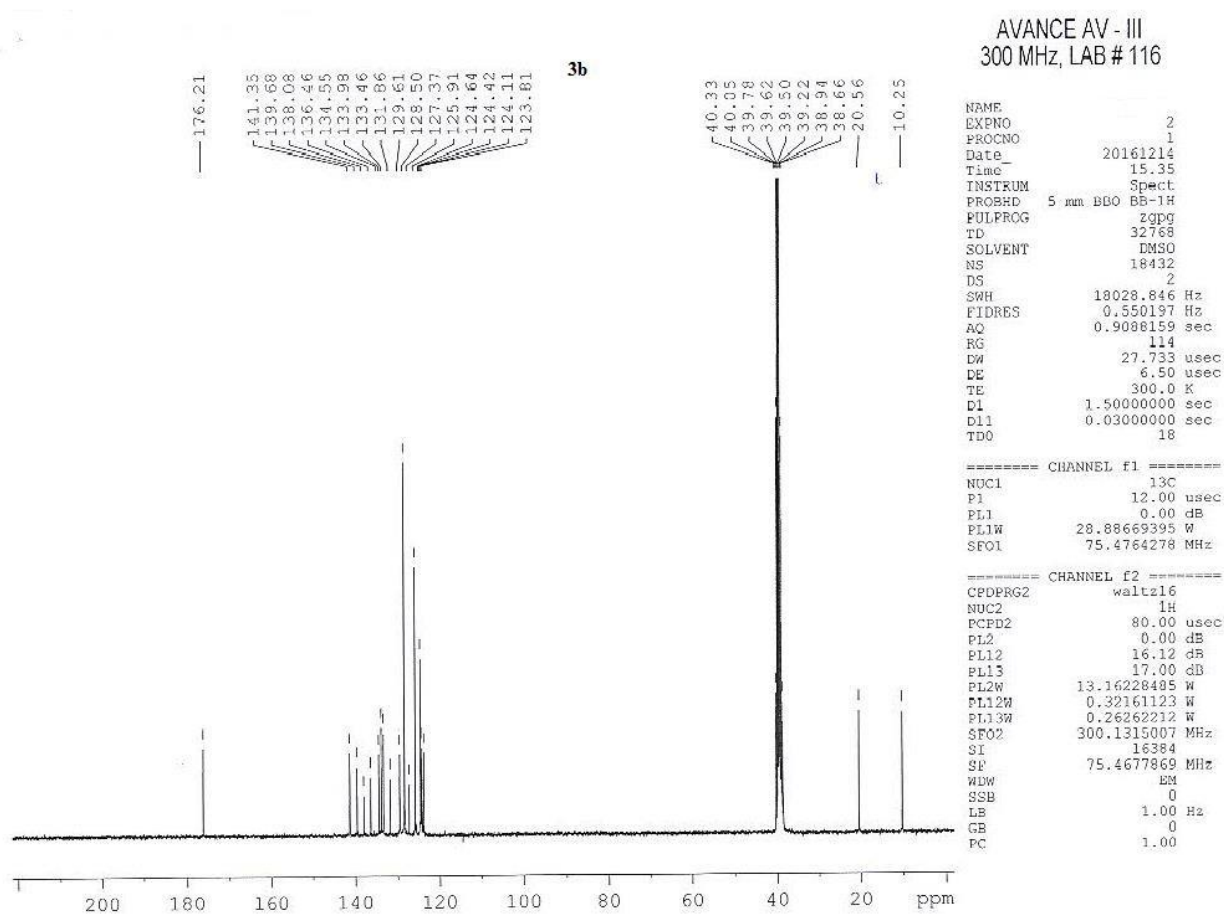

## Compound 3b : MS and HRMS

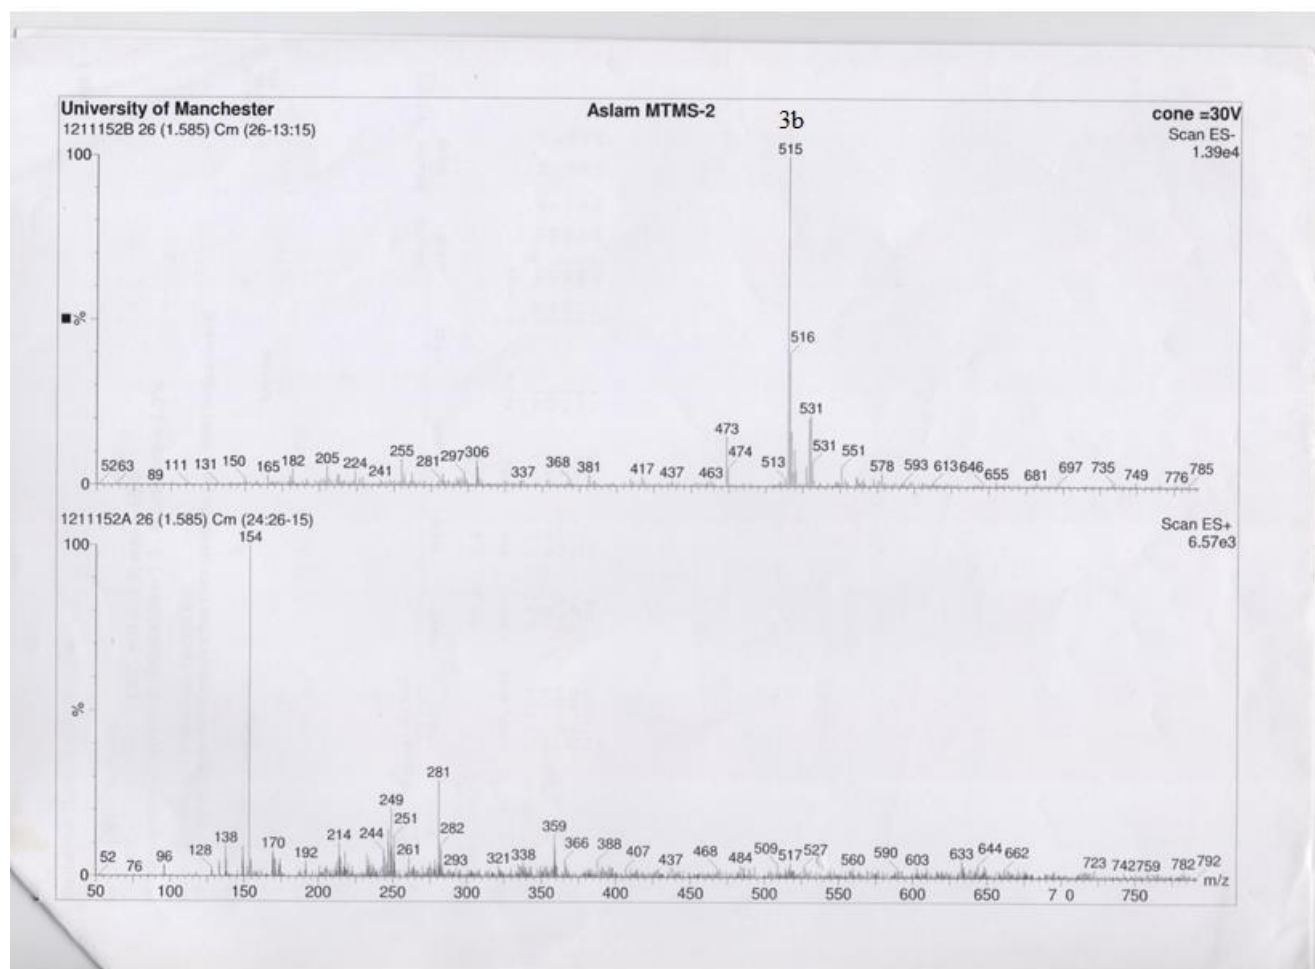



## Single Mass Analysis

Tolerance = 5.0 PPM / DBE: min = -1.5, max = 50.0

Isotope cluster parameters: Separation = 1.0 Abundance = 1.0%

Monoisotopic Mass, Odd and Even Electron Ions

676 formula(e) evaluated with 5 results within limits (all results (up to 1000) for each mass)

Asiam MTMS-2  
1211234HnAFAMM 72 (1.165) Cm (67.73)Core= 30V  
1: TOF MS ES-  
70.5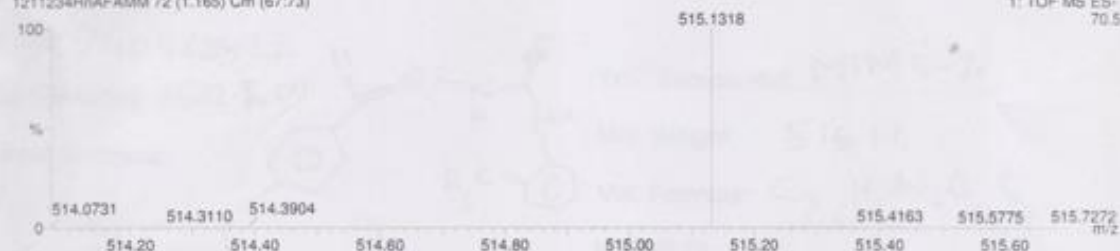

Minimum: 30.00  
Maximum: 100.00  
200.0 5.0 -1.5 50.0

| Mass     | RA     | Calc. Mass | mDa  | PPM  | DBE  | Score | Formula             |
|----------|--------|------------|------|------|------|-------|---------------------|
| 515.1318 | 100.00 | 515.1316   | 0.2  | 0.5  | 13.5 | n/a   | C25 H27 N2 O6 S2 +e |
|          |        | 515.1316   | 0.2  | 0.5  | 19.0 | n/a   | C24 H21 N9 O S2 +e  |
|          |        | 515.1329   | -1.1 | -2.1 | 18.5 | n/a   | C26 H23 N6 O2 S2 +e |
|          |        | 515.1302   | 1.6  | 3.1  | 14.0 | n/a   | C23 H25 N5 O5 S2 +e |
|          |        | 515.1342   | -2.4 | -4.7 | 18.0 | n/a   | C28 H25 N3 O3 S2 +e |

# Compound 3c : <sup>1</sup>H NMR

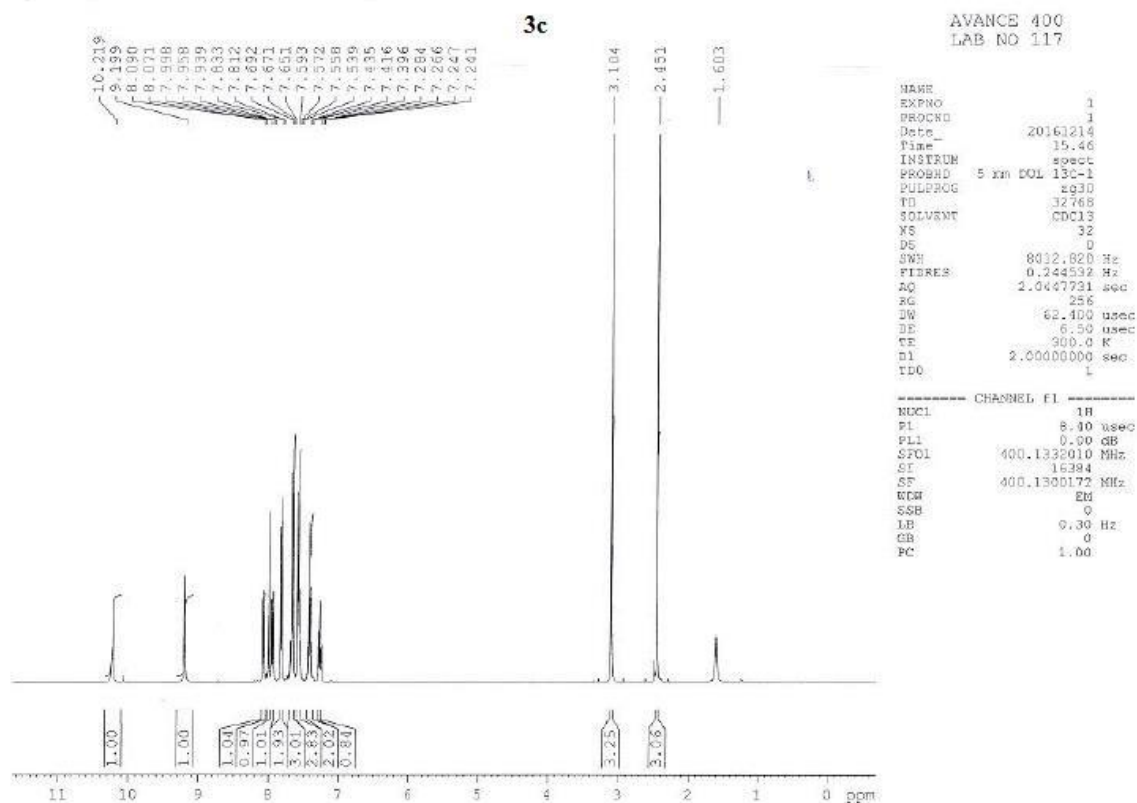

# Compound 3c : <sup>13</sup>C NMR

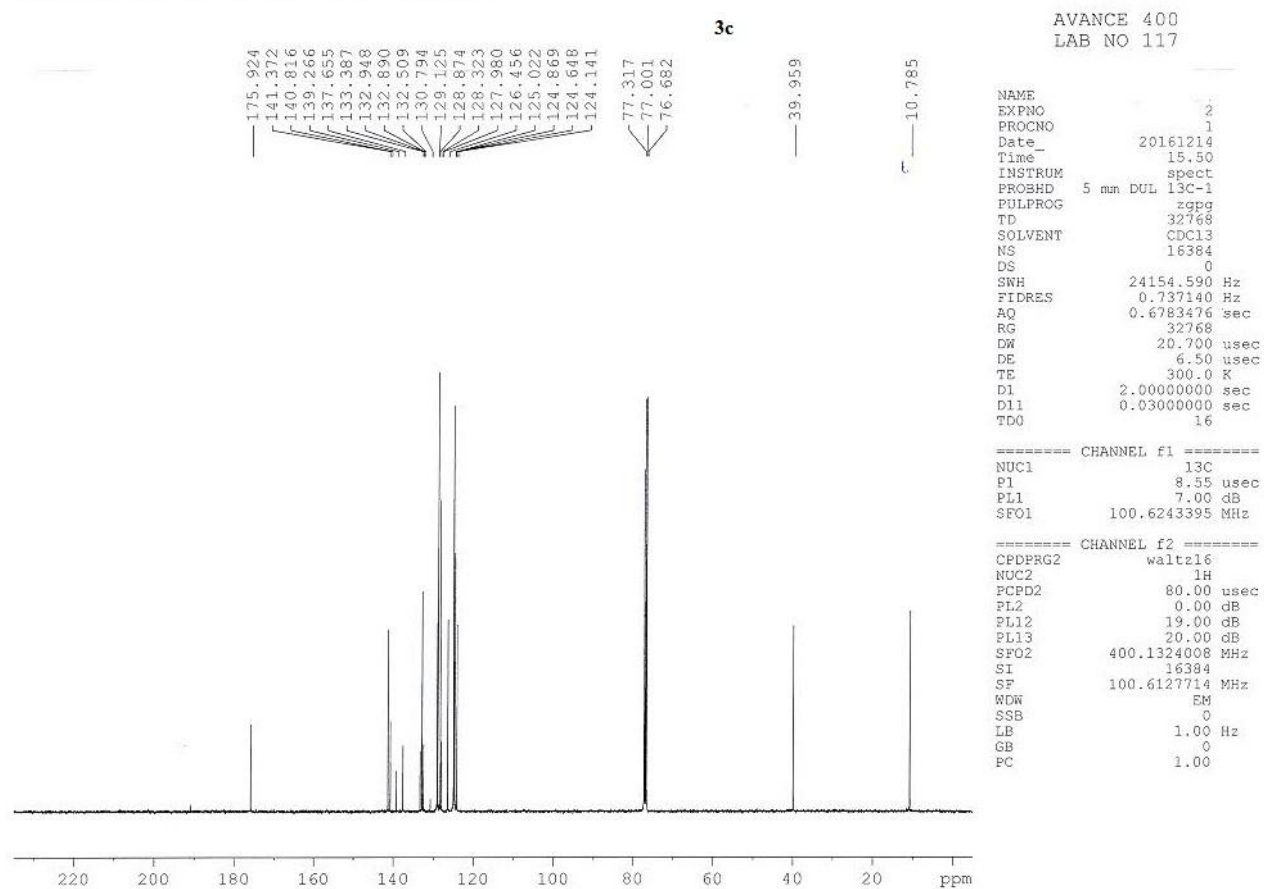

## Compound 3c : MS and HRMS

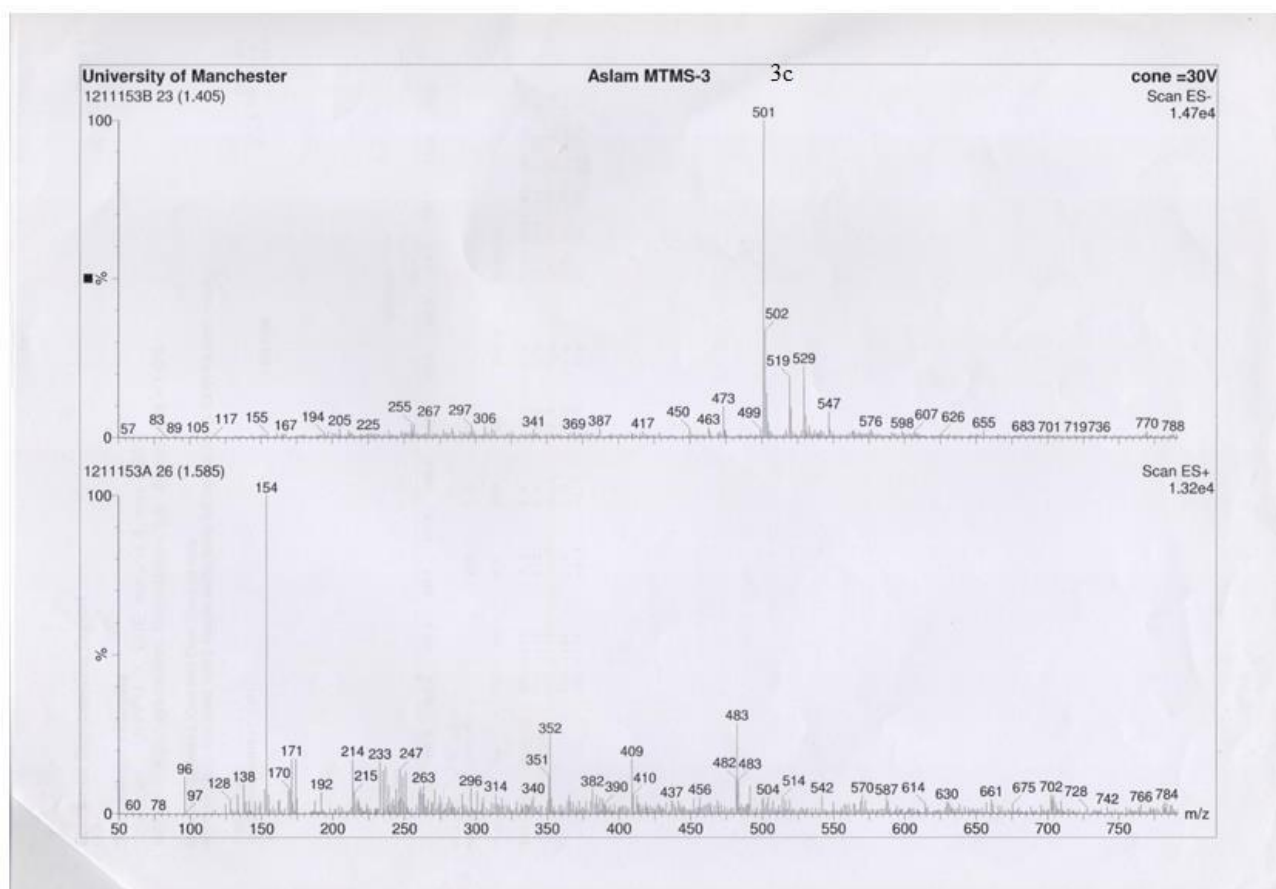

## Single Mass Analysis

Tolerance = 5.0 PPM / DBE: min = -1.5, max = 50.0

Isotope cluster parameters: Separation = 1.0 Abundance = 1.0%

Monoisotopic Mass, Odd and Even Electron Ions

605 formula(e) evaluated with 5 results within limits (all results (up to 1000) for each mass)

Asiam MTMS-3  
1211236HnAFAMMA 51 (0.821)Cone= 30V  
1: TOF MS ES-  
29.1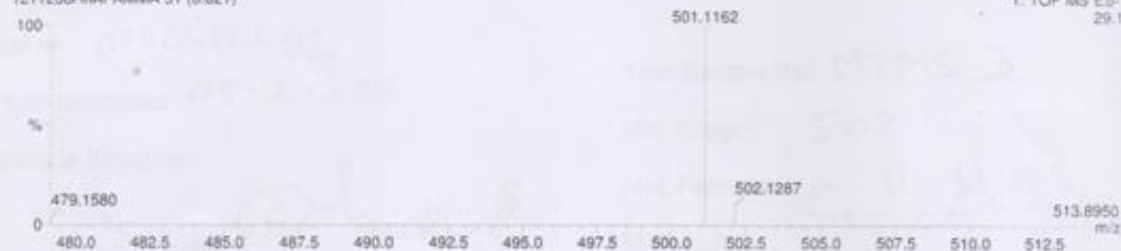Minimum: 30.00  
Maximum: 100.00200.0 5.0 -1.5  
50.0

| Mass     | RA     | Calc. Mass | mDa  | PPM  | DBE  | Score | Formula             |
|----------|--------|------------|------|------|------|-------|---------------------|
| 501.1162 | 100.00 | 501.1159   | 0.3  | 0.6  | 13.5 | n/a   | C24 H25 N2 O4 S2 +e |
|          |        | 501.1159   | 0.3  | 0.6  | 19.0 | n/a   | C23 H19 N9 O S2 +e  |
|          |        | 501.1172   | -1.0 | -2.1 | 18.5 | n/a   | C25 H21 N6 O3 S2 +e |
|          |        | 501.1146   | 1.6  | 3.3  | 14.0 | n/a   | C22 H23 N5 O5 S2 +e |
|          |        | 501.1186   | -2.4 | -4.8 | 18.0 | n/a   | C27 H23 N3 O3 S2 +e |

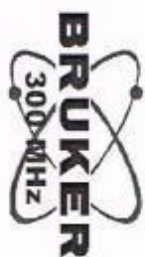

ONight DMSO {E:\bruk300data\2011\Dec} JMG 43

Compound 3d

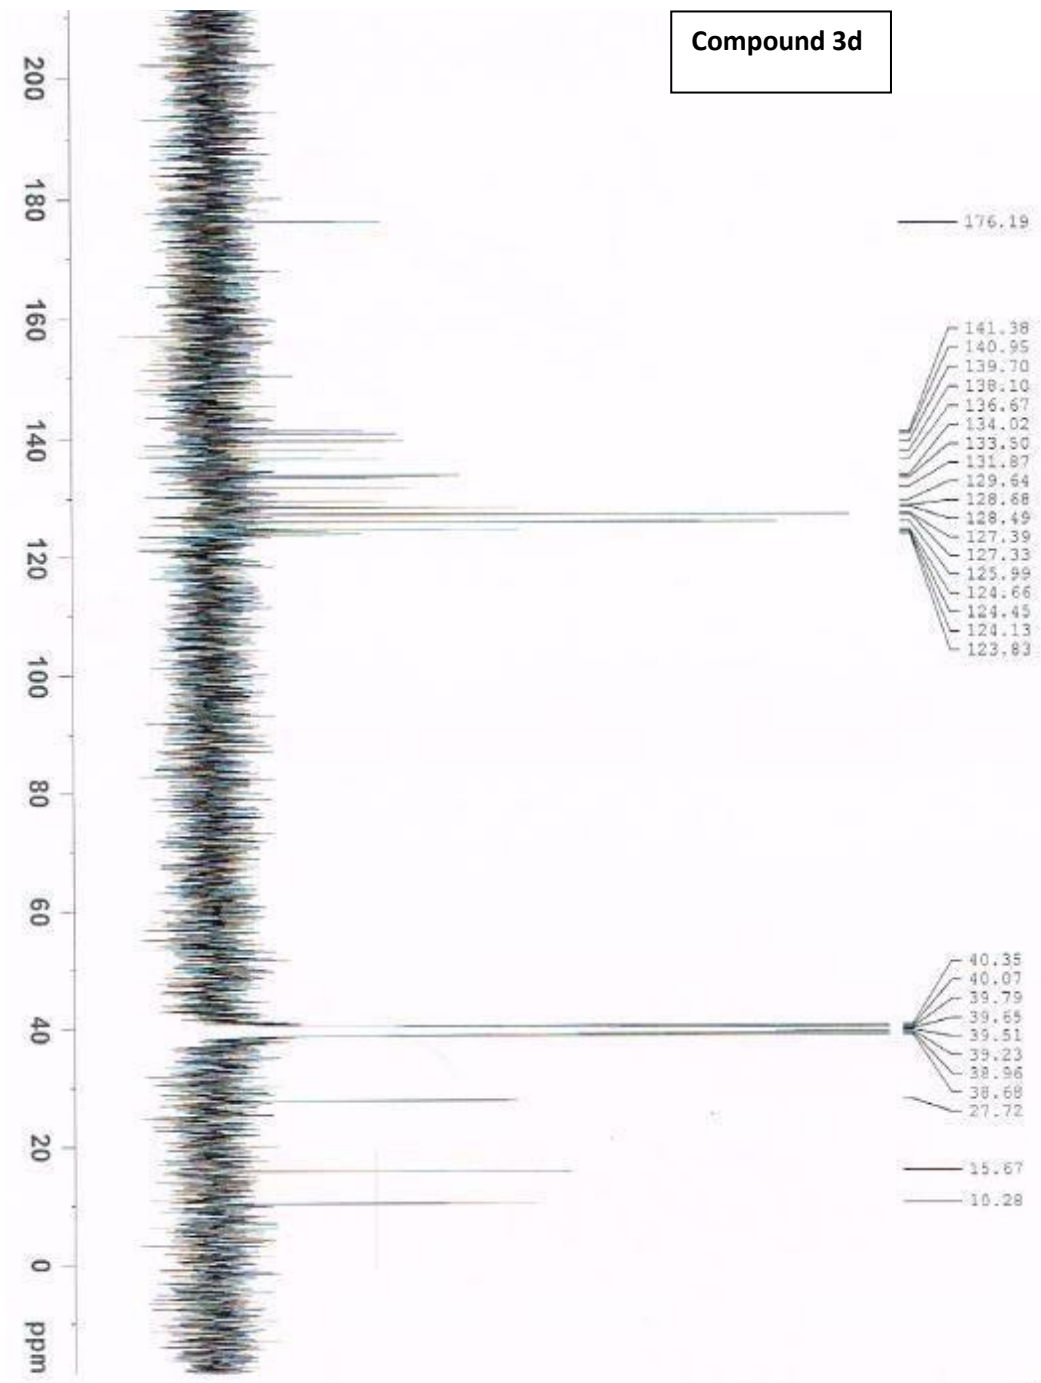

Current Data Parameters  
 NAME 2011-12-14-05-43  
 EXPNO 11  
 PROCNO 1  
 F2 - Acquisition Parameters  
 Date\_ 2011.12.14  
 Time 5.36  
 INSTRUM DEK300  
 PROBRD 5 mm TRL 13C-1  
 PULPROG zgpg30  
 TD 65536  
 SOLVENT DMSO  
 NS 1024  
 DS 2  
 SWH 17057.143 Hz  
 FIDRES 0.272498 Hz  
 AQ 1.8350580 sec  
 RG 9195.2  
 AC 38.000 usec  
 TC 6.40 usec  
 TB 300.0 K  
 D1 2.00000000 sec  
 D11 0.00000000 sec  
 DELTA 1.89999998 sec  
 TDO 1  
 ===== CHANNEL f1 =====  
 NUC1 13C  
 P1 10.00 usec  
 PL1 -1.50 dB  
 SFO1 75.430000 MHz  
 ===== CHANNEL f2 =====  
 COMPO2 water216  
 NUC2 1H  
 P2 80.00 usec  
 PL2 -2.60 dB  
 PL3 14.00 dB  
 PL13 14.00 dB  
 SFO2 299.9914000 MHz  
 F2 - Processing parameters  
 SI 32768  
 SF 25.426824 MHz  
 MD 0  
 AS 0  
 SN 0  
 DE 0  
 SC 1.40

Compound 3d

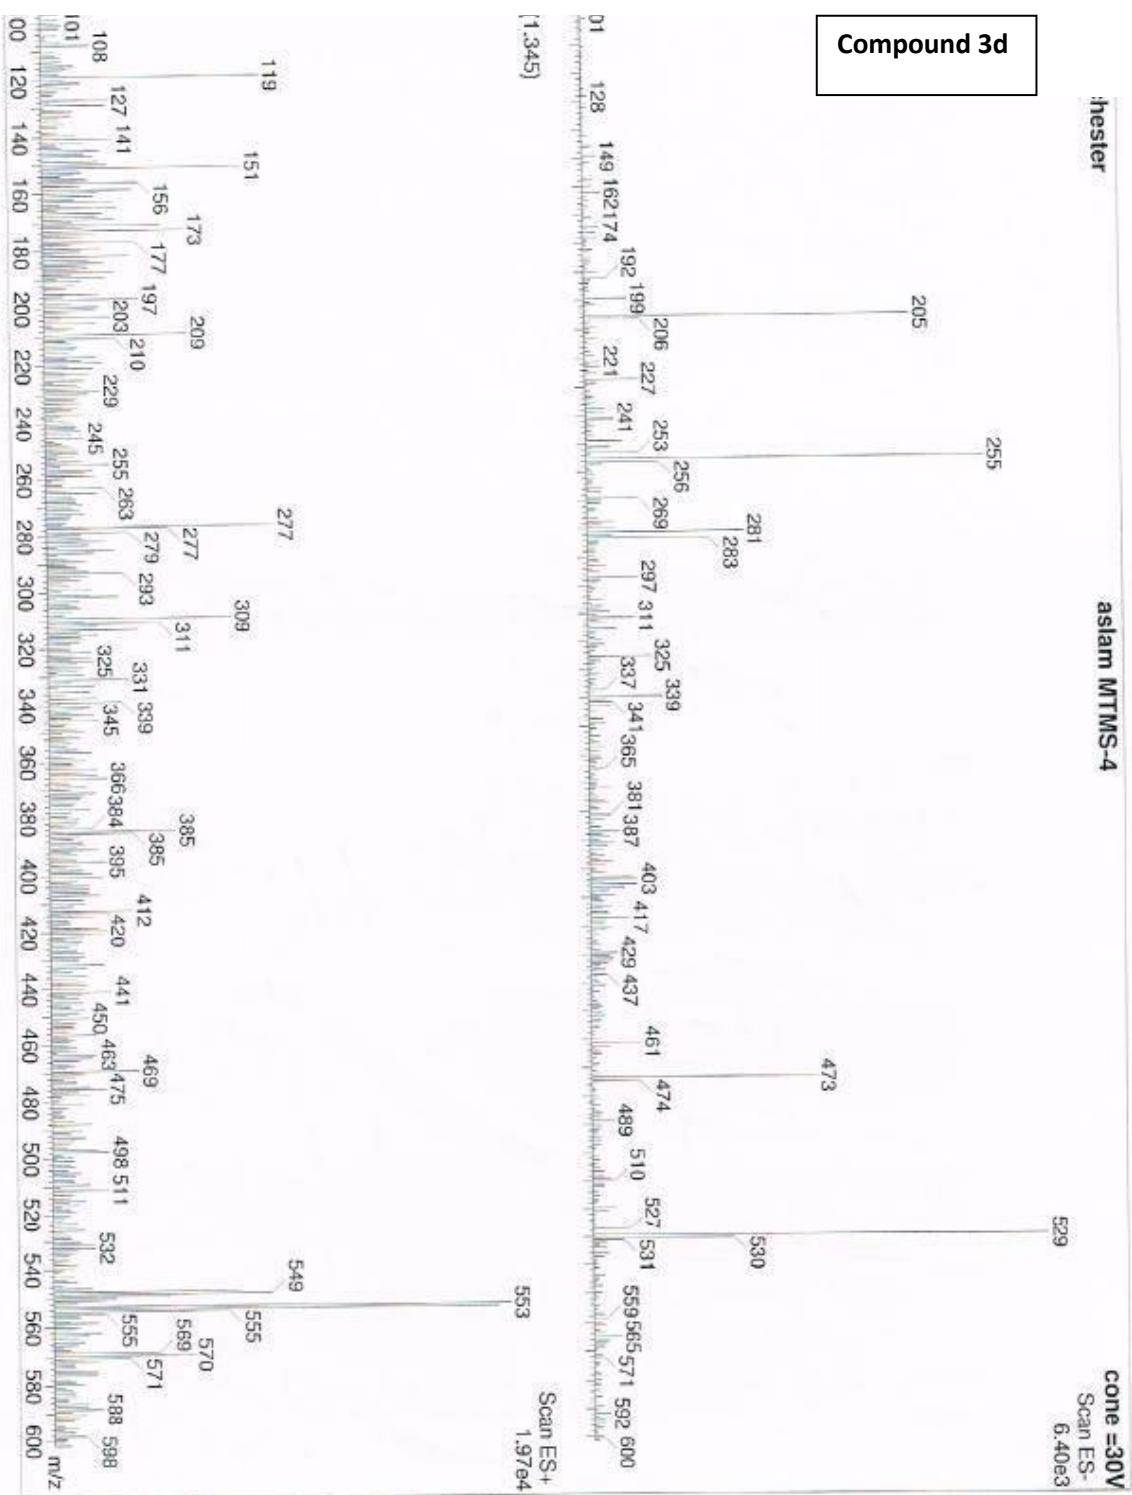



# Compound 3f

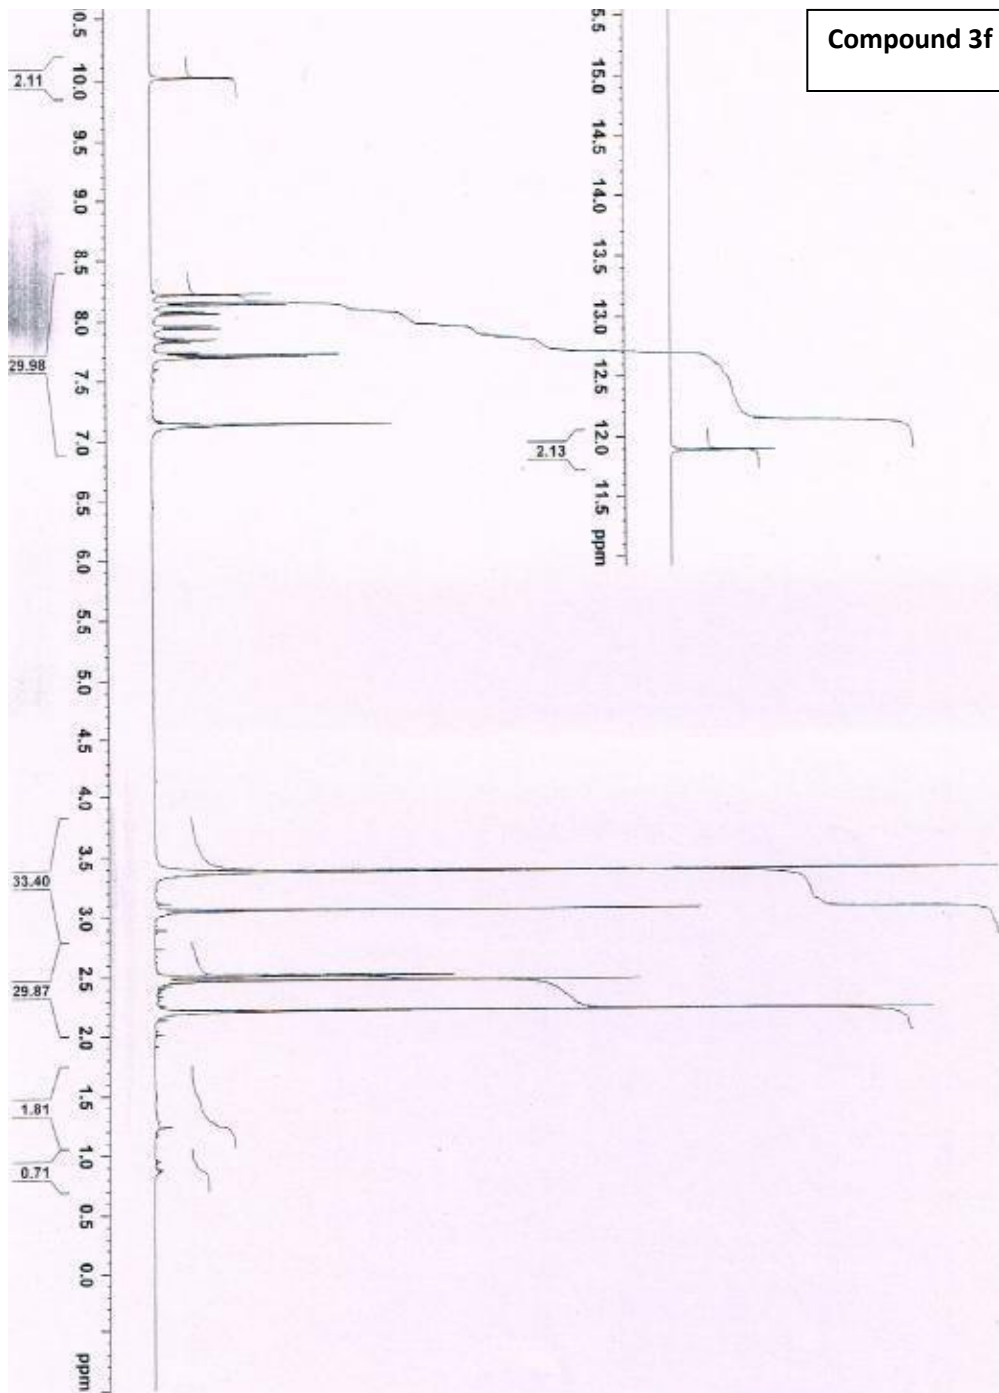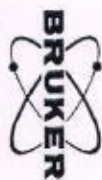

Current Data Parameters  
NAME Morf-2012-09g  
EXNO 50  
PROCNO 1

F2 - Acquisition Parameters  
Date\_ 20120308  
Time 10.26  
INSTRUM spect  
PROBHD 5 mm Multinuc  
PULPROG zgpg30  
FIDPROC 6336  
TD 32768  
SOLVENT H<sub>2</sub>O  
NS 2  
DS 2  
SWH 9278.146 Hz  
FIDRES 0.12614 Hz  
AQ 3.956243 sec  
RG 256  
EW 60.800 usec  
DE 6.00 usec  
TE 300.0 K  
D1 1.00000000 sec  
TD0 1

CHANNEL f1  
NUC1 1H  
P1 10.00 usec  
PL -0.10 dB  
SFO1 400.1324710 MHz

F2 - Processing parameters  
SI 65536  
SF 400.1300000 MHz  
WDW EM  
SSB 0  
LB 0.30 Hz  
GB 0  
PC 1.00

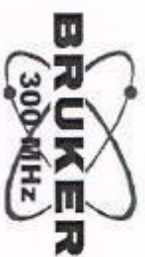

night DMSO {E:\bruk300data\2012\Jan\} JMG 39

Compound 3f

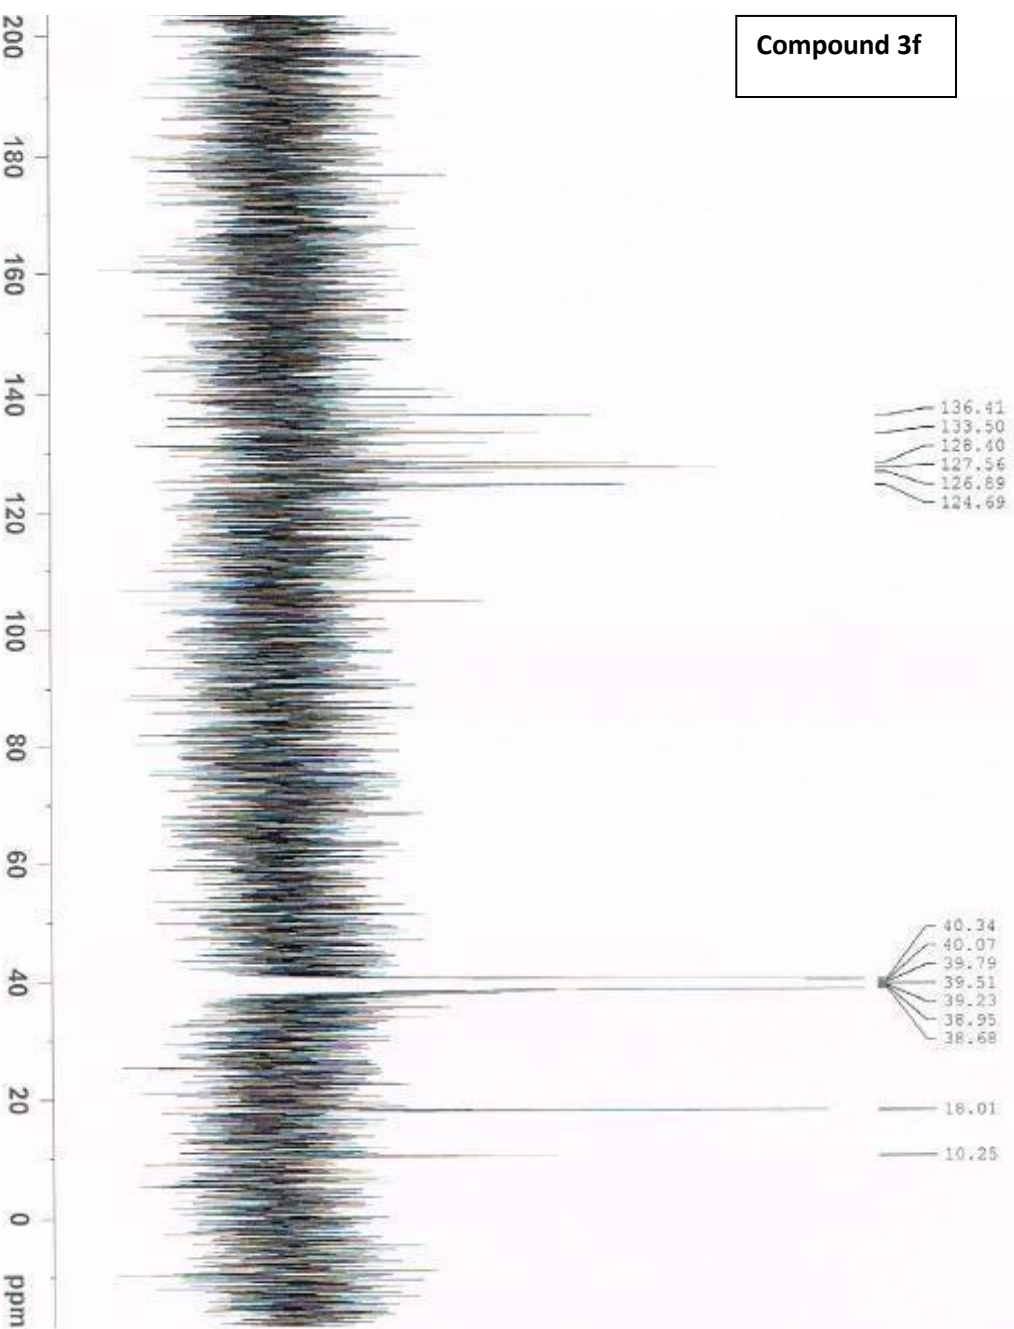

Current Data Parameters  
NAME 2012-01-09-JMG-39  
EXPNO 11  
PROCNO 1  
F2 - Acquisition Parameters  
Date\_ 20120110  
Time 6.45  
INSTRUM DFX300  
PROBHD 5 mm DUL 1JC-1  
PULPROG zgpg30  
TD 65536  
SOLVENT DMSO  
NS 1024  
DS 2  
SWH 11851.143 Hz  
FIDRES 0.272478 Hz  
AQ 1.8350580 sec  
RG 3155.2  
FW 28.000 MHz  
GB 6.00 MHz  
DC 300.0 K  
TS 2.00000000 sec  
D1 0.01000000 sec  
DELTA 1.89999998 sec  
TD0 1  
===== CHANNEL f1 =====  
NUC1 13C  
P1 10.00 usec  
PL1 -1.20 dB  
SFO1 75.4700300 MHz  
===== CHANNEL f2 =====  
CPDPRG2 waltz16  
NUC2 1H  
PCPD2 80.00 usec  
PL2 -2.60 dB  
PL12 14.50 dB  
PL13 15.00 dB  
SFO2 299.9512000 MHz  
F2 - Processing Parameters  
SI 32768  
SF 75.425447 MHz  
WDW EM  
SSB 0  
LB 3.00 Hz  
GB 0  
PC 1.40

Compound 3f

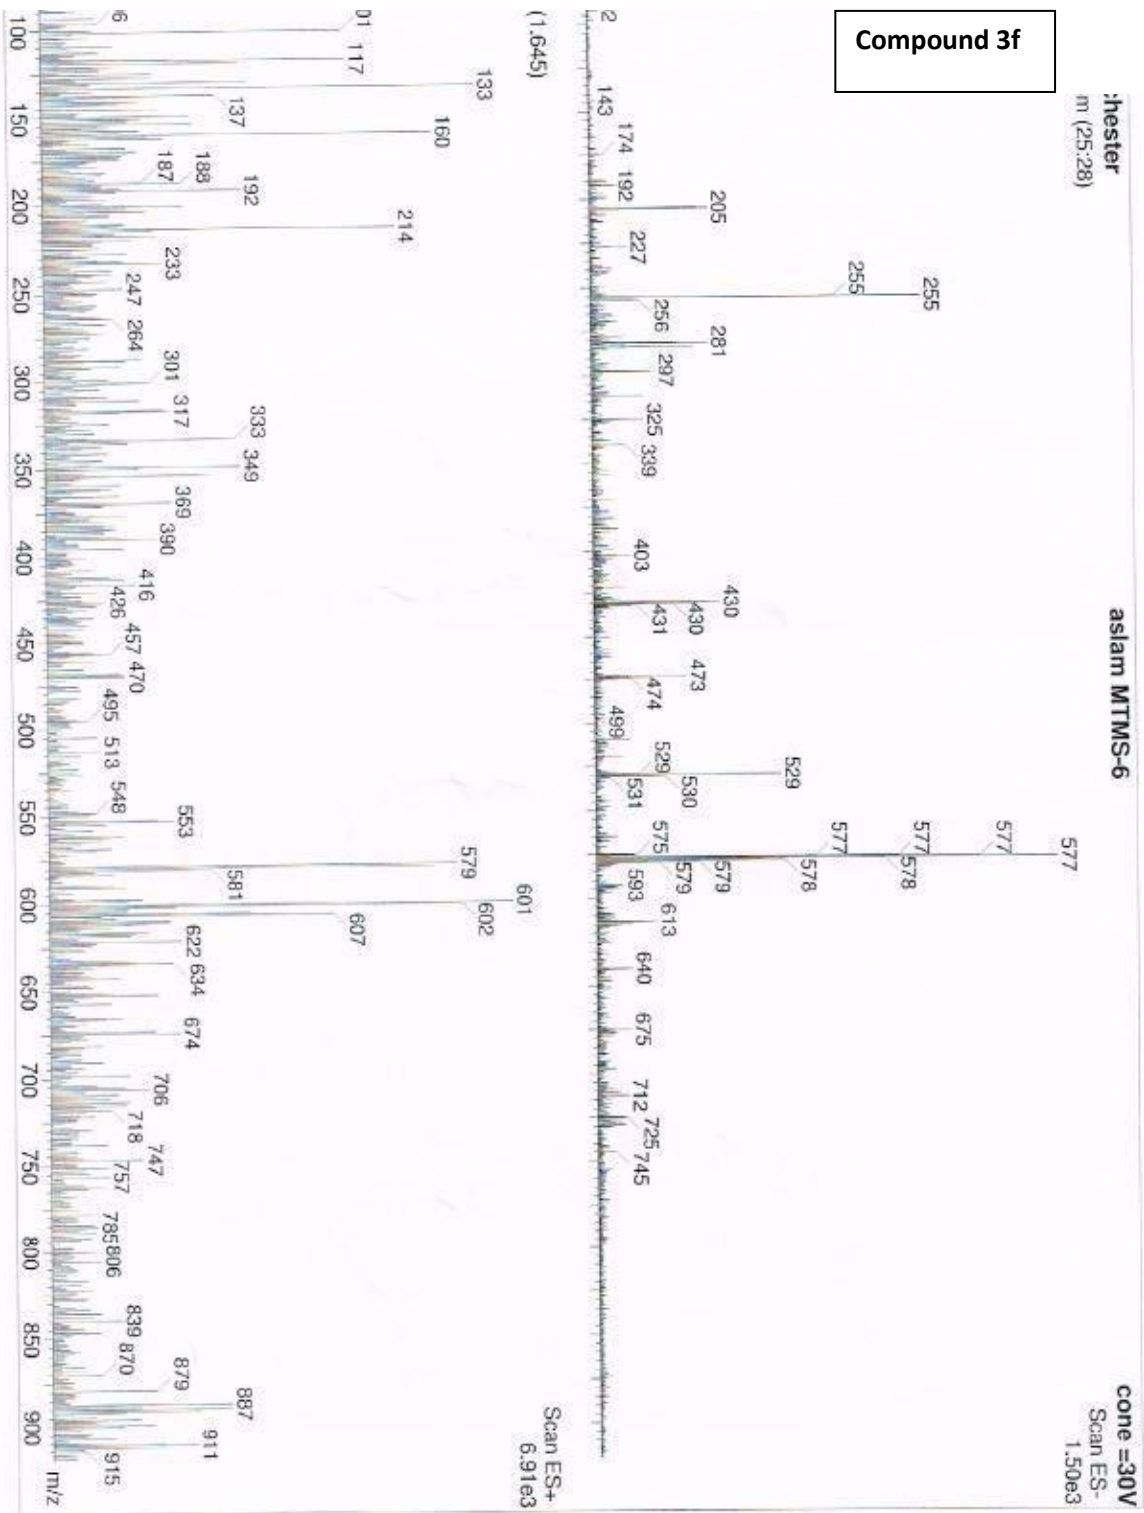

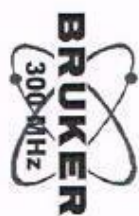

Compound 3g

light DMSO {E:\brukr300data\2011\Dec\} JMG 42

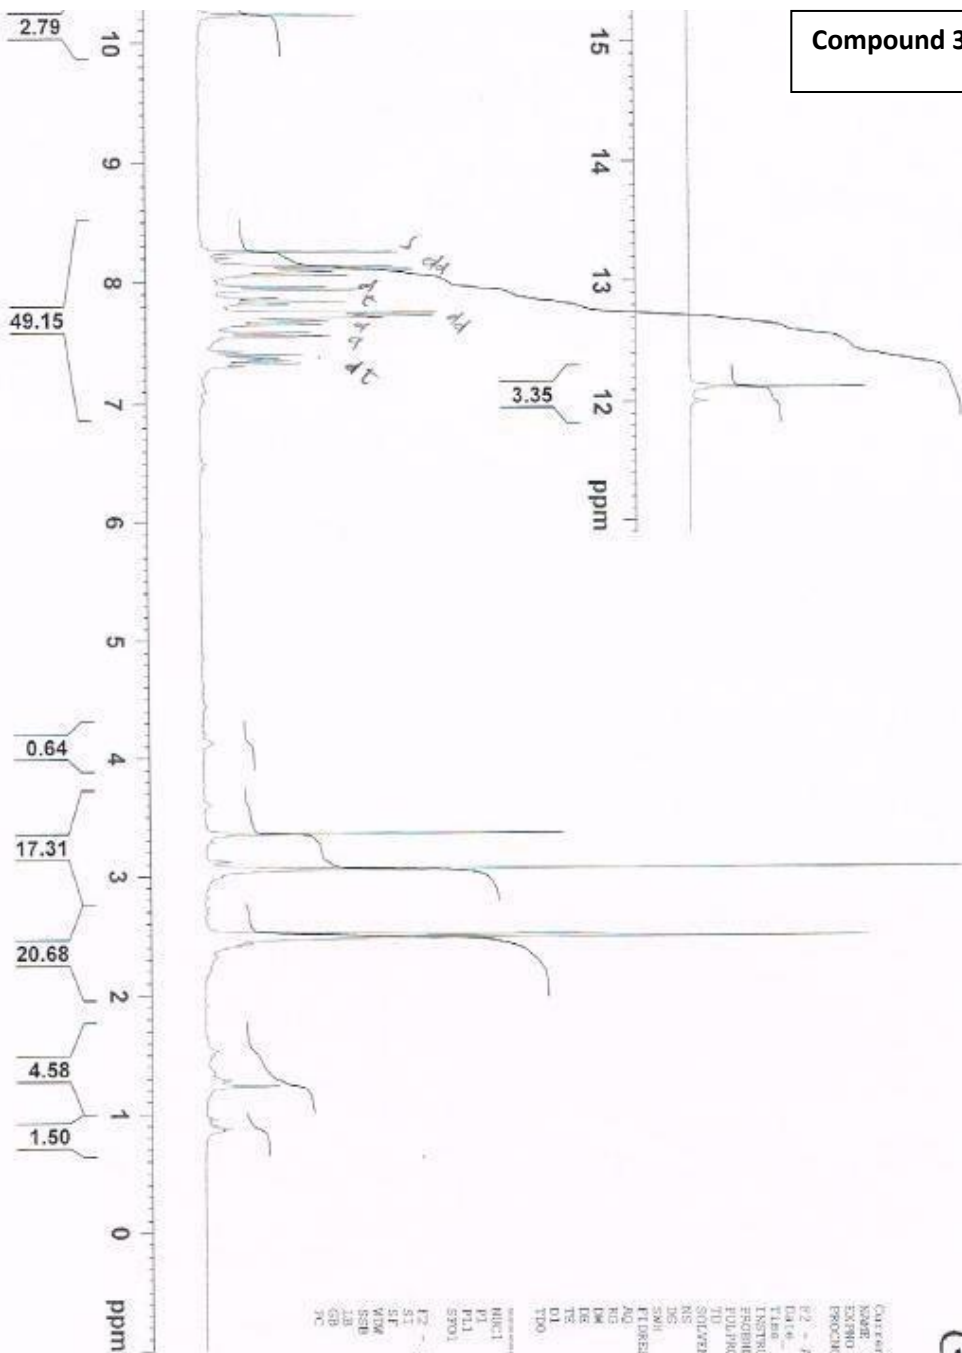

Current Data Parameters  
NAME: 2011-12-14-JMG-42  
EXTNO: 10  
PROCNO: 1  
F2 - Acquisition Parameters  
Date\_: 20111216  
Time: 2.49  
INSTRUM: spect  
PROBHD: 5 mm QNP 1H-13  
PULPROG: zgpg30  
FIDPROC: 65536  
SOLVENT: DMSO  
NS: 16  
DS: 0  
SWH: 6172.839 Hz  
FIDRES: 0.094190 Hz  
AQ: 5.3084660 sec  
RG: 456.1  
DM: 81.000 usec  
DE: 6.00 usec  
TE: 300.0 K  
D1: 0.10000000 sec  
TDO: 1  
===== CH3OH, F1 =====  
NUC1: 1H  
P1: 10.00 usec  
PL1: -2.00 dB  
SFO1: 299.9518523 MHz  
F2 - Processing parameters  
SI: 32768  
SF: 299.9500000 MHz  
WDW: EM  
SSB: 0  
LB: 0.30 Hz  
GB: 0  
PC: 1.00

night DMSO {E:\bruk300\data\2011\Dec} JMG 42

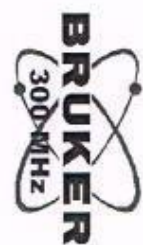

Compound 3g

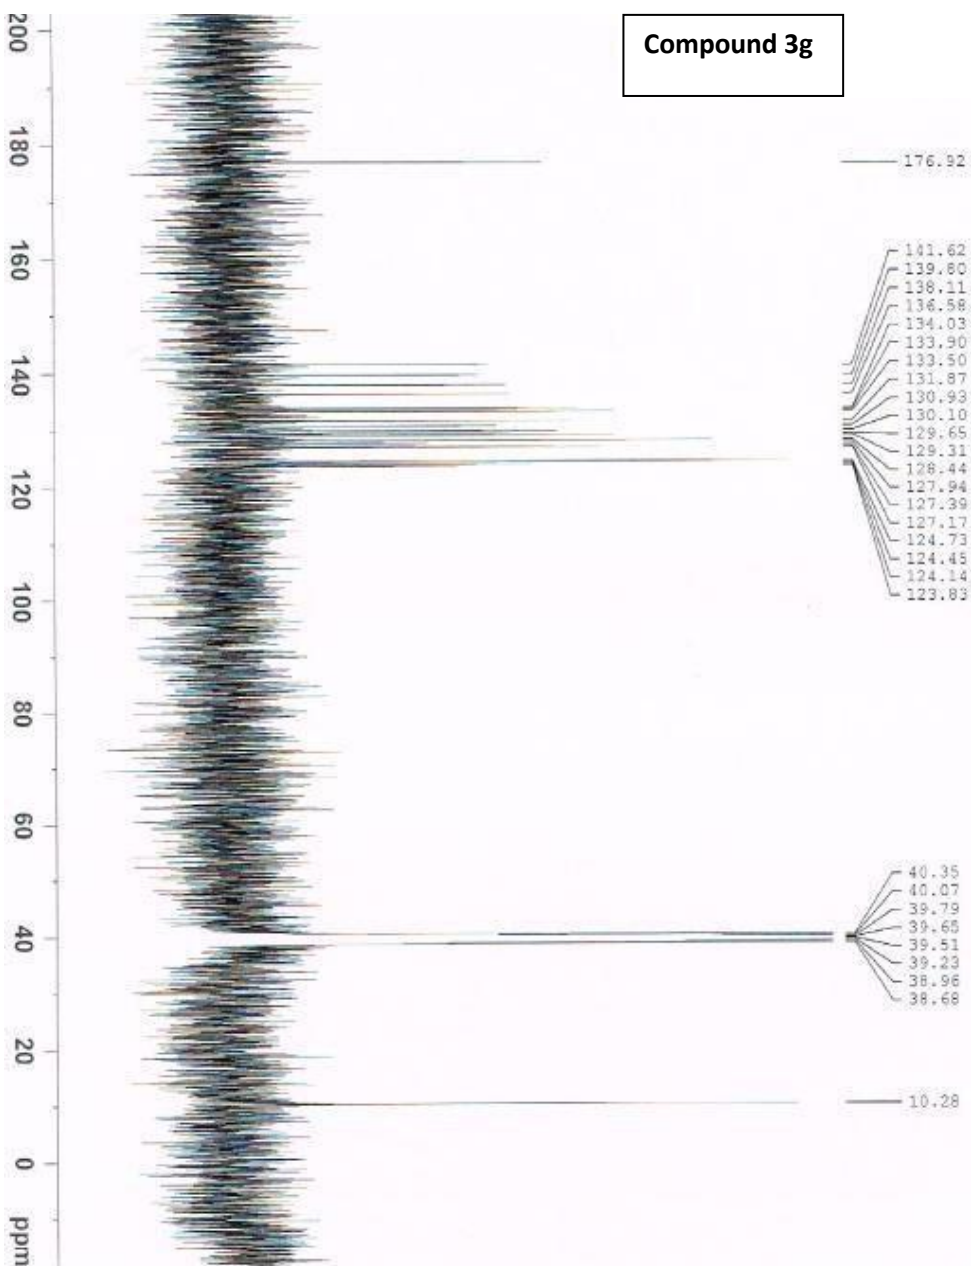

Current Data Parameters  
NAME 2011-12-11-005-42  
EXPNO 1  
PROCNO 1  
F2 - Acquisition Parameters  
Date\_ 20111216  
Time 1:57  
INSTRUM DEK300  
PROBHD 5 mm DPL 13C-1  
PULPROG zgpg30  
TD 65536  
SOLVENT DMSO  
NS 1020  
DS 2  
SWH 17857.143 Hz  
FIDRES 0.272778 Hz  
AQ 1.830300 sec  
RG 128.000  
RG 128.000  
AQ 6.00 usec  
RG 300.0 K  
TE 300.2 K  
DE 2.00000000 sec  
d11 0.03000000 sec  
DELTA 1.89999998 sec  
TDC  
===== CHANNEL f1 =====  
NUC1 13C  
P1 10.00 usec  
PL1 -1.20 dB  
SFO1 75.460050 MHz  
===== CHANNEL f2 =====  
CEPRPG2 waltz16  
NUC2 1H  
PCPD2 60.00 usec  
PL2 12.60 dB  
PL12 14.50 dB  
PL13 15.50 dB  
SFO2 299.9912000 MHz  
F2 - Processing parameters  
SI 32768  
SF 75.425247 MHz  
WDW EM  
SSB 0  
LB 1.00 Hz  
GB 0  
PC 1.40



# Compound 3g

light DMSO {E:\bruk300data\2011\Dec} JMG 42

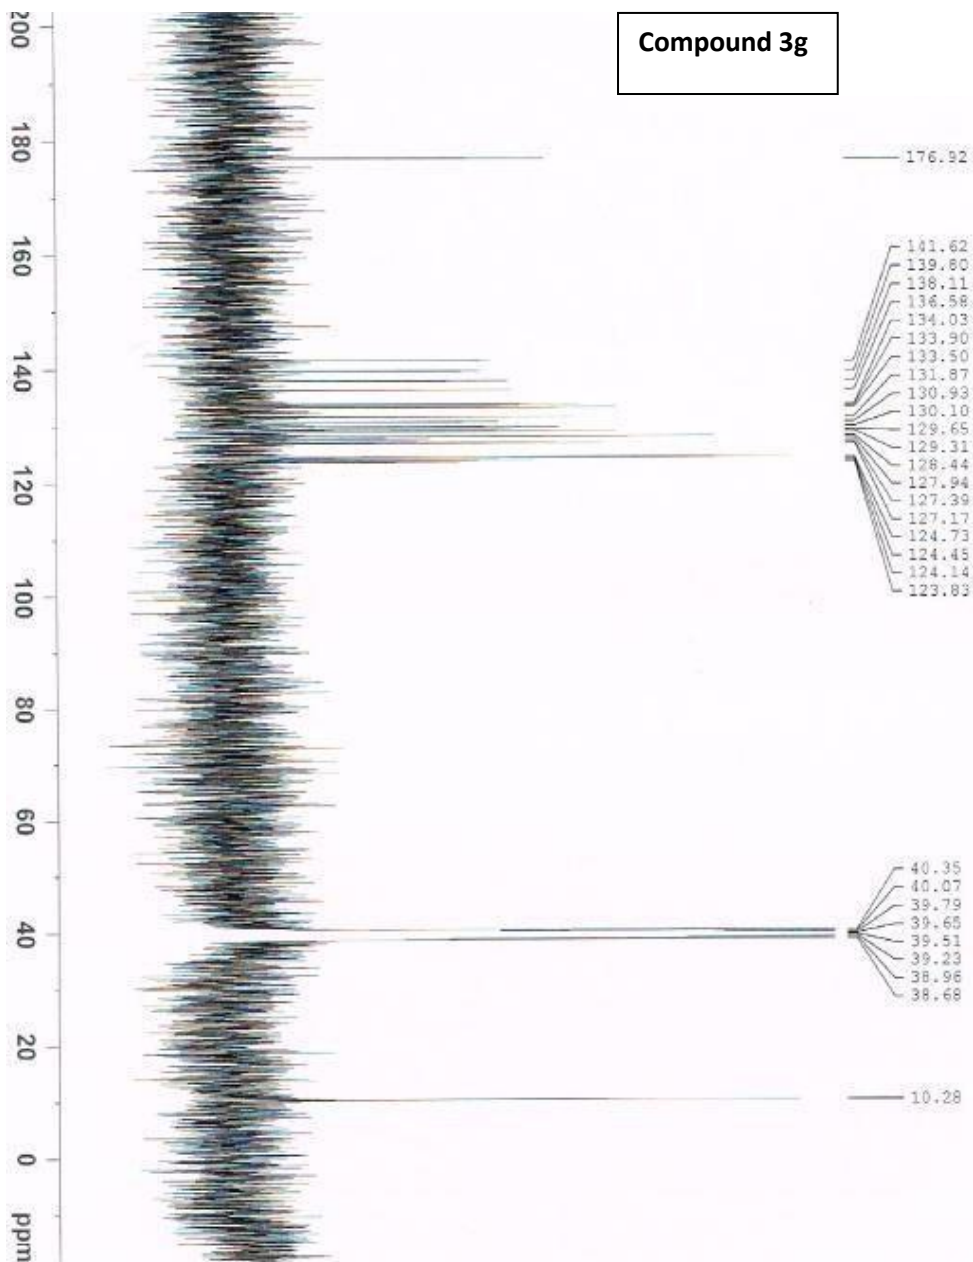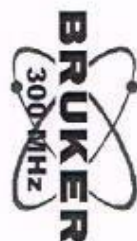

Current Data Parameters  
NAME 2011-12-14-BE-42  
EXPNO 11  
PROCNO 1

F2 - Acquisition Parameters  
Date\_ 20111216  
Time 1:57  
INSTRUM spect  
PROBHD 5 mm DPL 13C-1  
PULPROG zgpg30  
TD 65536  
SOLVENT DMSO  
NS 1024  
DS 4  
SWH 17857.141 Hz  
FIDRES 0.27278 Hz  
AQ 1.835080 sec  
RG 14596.5  
DM 28.000 usec  
DE 6.00 usec  
TE 300.2 K  
D1 2.00000000 sec  
d11 0.03000000 sec  
DELTA 1.89999998 sec  
TDC 1

===== CHANNEL f1 =====  
NUC1 13C  
P1 10.00 usec  
PL1 -1.20 dB  
SFO1 75.430050 MHz

===== CHANNEL f2 =====  
CPDPRG2 waltz16  
KIN2 18  
PCPD2 60.00 usec  
PL2 -2.60 dB  
PL12 14.50 dB  
PL13 15.00 dB  
SFO2 299.9512000 MHz

F2 - Processing parameters  
SI 32768  
SF 75.422547 MHz  
WDW EM  
SSB 0  
LB 1.00 Hz  
GB 0  
PC 1.40

35night DMSO {E:\bruk300\data\2011\Dec\} JMG 42

Compound 3g

DEPT135

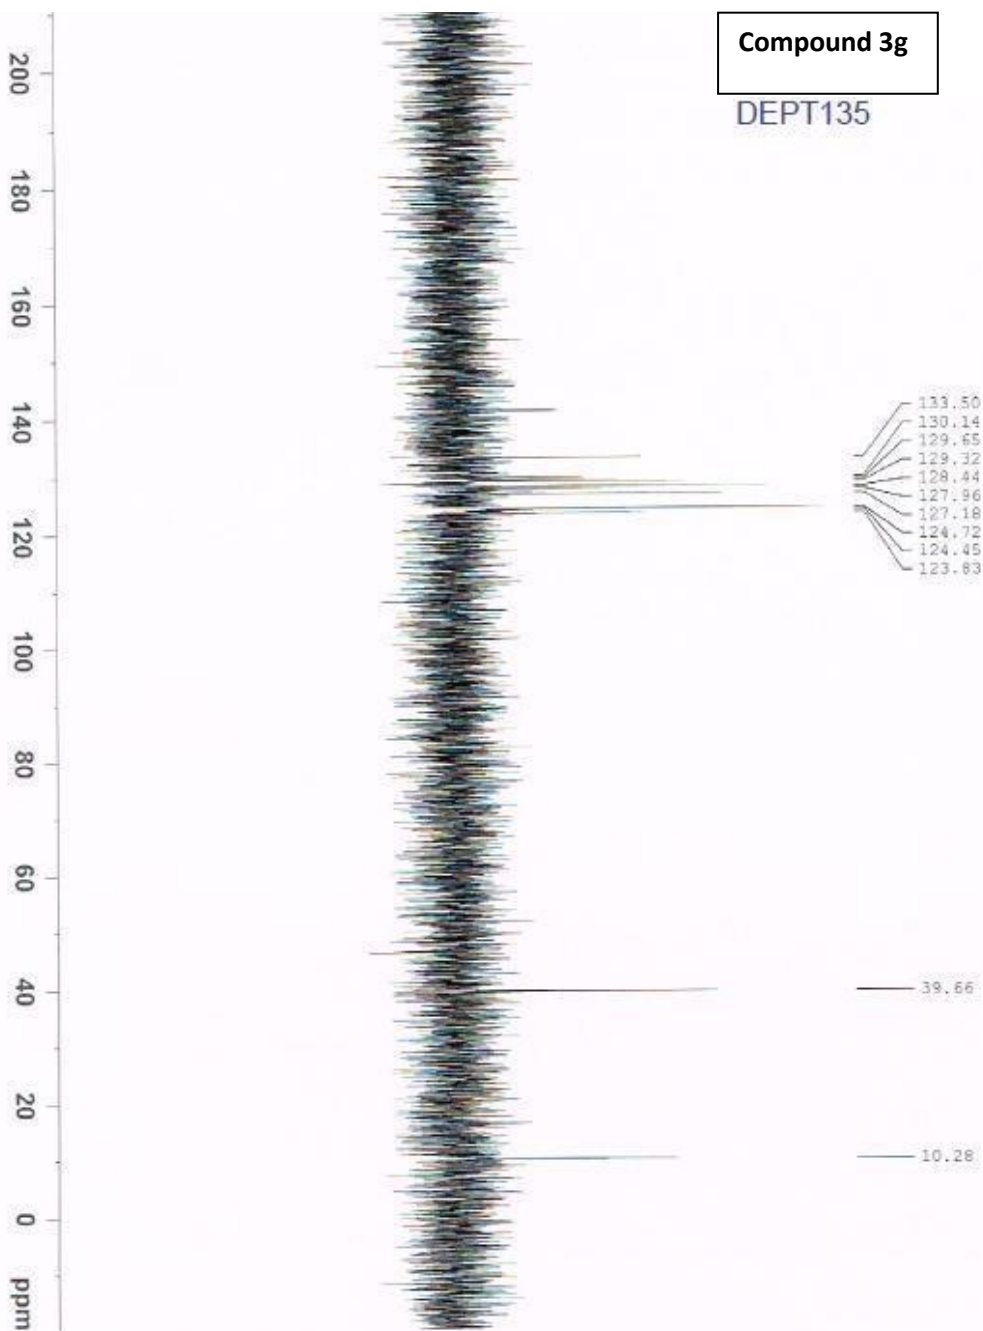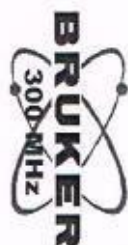

Current Data Parameters  
 NAME 2011-12-14-JMG-42  
 EXPNO 12  
 PROCNO 1  
 F2 - Acquisition Parameters  
 Date\_ 20111216  
 Time\_ 4.06  
 INSTRUM DEK300  
 PROBRD 5 mm ETV 13C-1  
 PULPROG zgpg30  
 TD 65536  
 FIDRES 0.0001273  
 AQ 1.6384  
 SFO1 125.760327  
 SOLVENT DMSO  
 NS 120  
 DS 4  
 SWH 11965.411 Hz  
 FIDRES 0.0001273 Hz  
 AQ 1.6384  
 SFO1 125.760327  
 SFO2 299.611996 MHz  
 CHANNEL F1  
 NUC1 13C  
 P1 10.00 usec  
 P2 20.00 usec  
 PL1 -1.20 dB  
 SFO1 125.760327 MHz  
 CHANNEL F2  
 NUC2 1H  
 P3 10.50 usec  
 P4 21.00 usec  
 PCPDZ 60.00 usec  
 PL2 2.00 dB  
 PL12 14.50 dB  
 SFO2 299.611996 MHz  
 F2 - Processing parameters  
 SI 32768  
 SF 75.422547 MHz  
 WHW 0  
 WDW EM  
 RB 1.00 Hz  
 GB 0  
 SC 1.40



## Elemental Composition Report

## Compound 3g

## Single Mass Analysis

Tolerance = 5.0 PPM / DBE: min = -1.5, max = 50.0

Isotope cluster parameters: Separation = 1.0 Abundance = 1.0%

Monoisotopic Mass, Odd and Even Electron Ions

593 formula(e) evaluated with 5 results within limits (all results (up to 1000) for each mass)

aslam MTMS-7

1211634-HnAFAMM 42 (0.673) Cm (36:56)

100

Cone: 30V  
1: TOF MS ES-  
79.8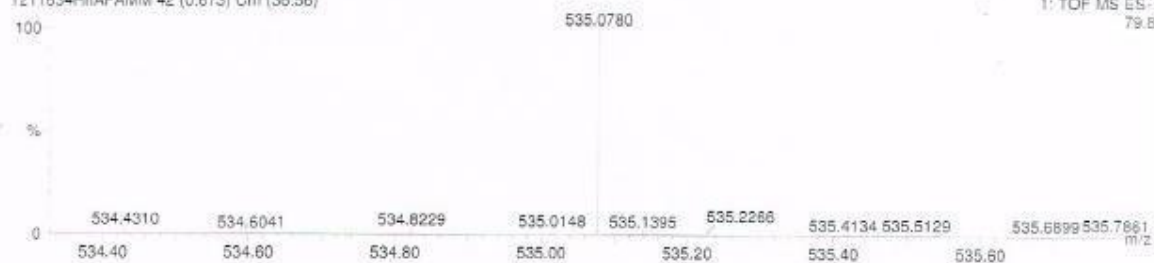Minimum: 30.00  
Maximum: 100.00200.0 5.0 -1.5  
50.0

| Mass     | RA     | Calc. Mass | mDa  | PPM  | DBE  | Score | Formula                |
|----------|--------|------------|------|------|------|-------|------------------------|
| 535.0780 | 100.00 | 535.0783   | -0.3 | -0.5 | 18.5 | n/a   | C25 H20 N6 O2 S2 Cl +e |
|          |        | 535.0769   | 1.1  | 2.0  | 13.5 | n/a   | C24 H24 N2 O6 S2 Cl +e |
|          |        | 535.0769   | 1.1  | 2.0  | 19.0 | n/a   | C23 H18 N9 O S2 Cl +e  |
|          |        | 535.0796   | -1.6 | -3.0 | 18.0 | n/a   | C27 H22 N3 O3 S2 Cl +e |
|          |        | 535.0756   | 2.4  | 4.5  | 14.0 | n/a   | C22 H22 N5 O5 S2 Cl +e |

Compound 3h

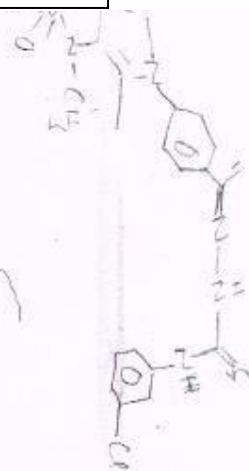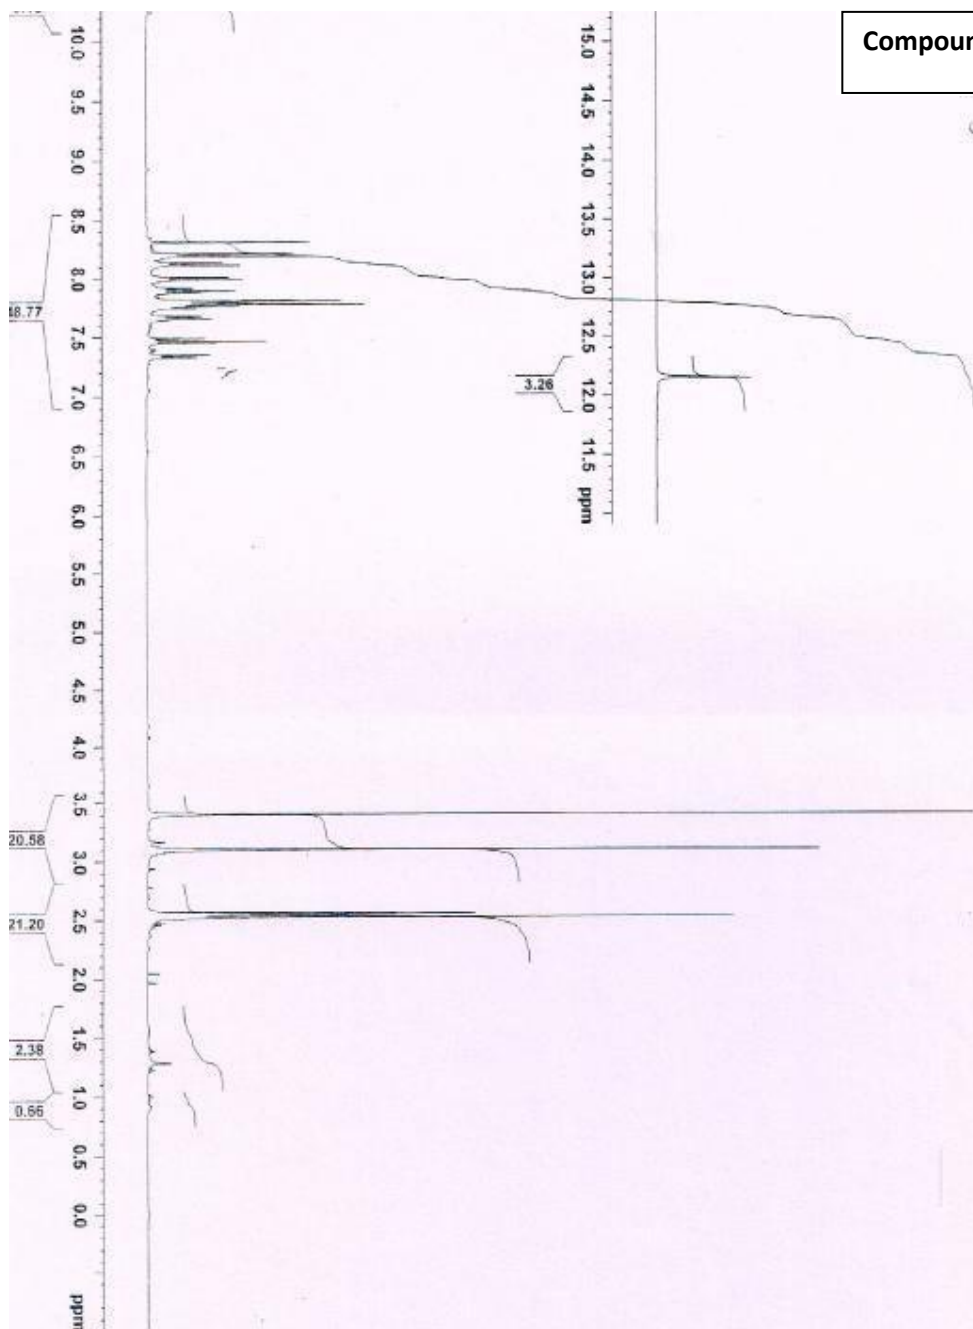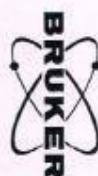

Current Data Parameters  
NAME Dec06-2011-1MG  
EXPNO 40  
PROCNO 1

F2 - Acquisition Parameters

Date\_ 20111206  
Time 18:23  
INSTRUM spect  
PROCNO 5  
PULPROG zgpg30  
TD 65536  
SOLVENT DMSO  
NS 16  
DS 2  
SWH 8278.146 Hz  
FIDRES 0.126314 Hz  
AQ 3.9986203 sec  
RG 327.5  
AQ 64.100 usec  
DE 6.00 usec  
TE 300.1 K  
D1 1.00000000 sec  
TDO 1

===== CHANNEL f1 =====

MUCL 1H  
P1 10.00 usec  
PL1 -0.10 dB  
SFO1 400.1324710 MHz

F2 - Processing parameters

SI 65536  
SF 400.1299797 MHz  
WDW EM  
SSB 0  
GB 0  
PC 1.00

# Compound 3h

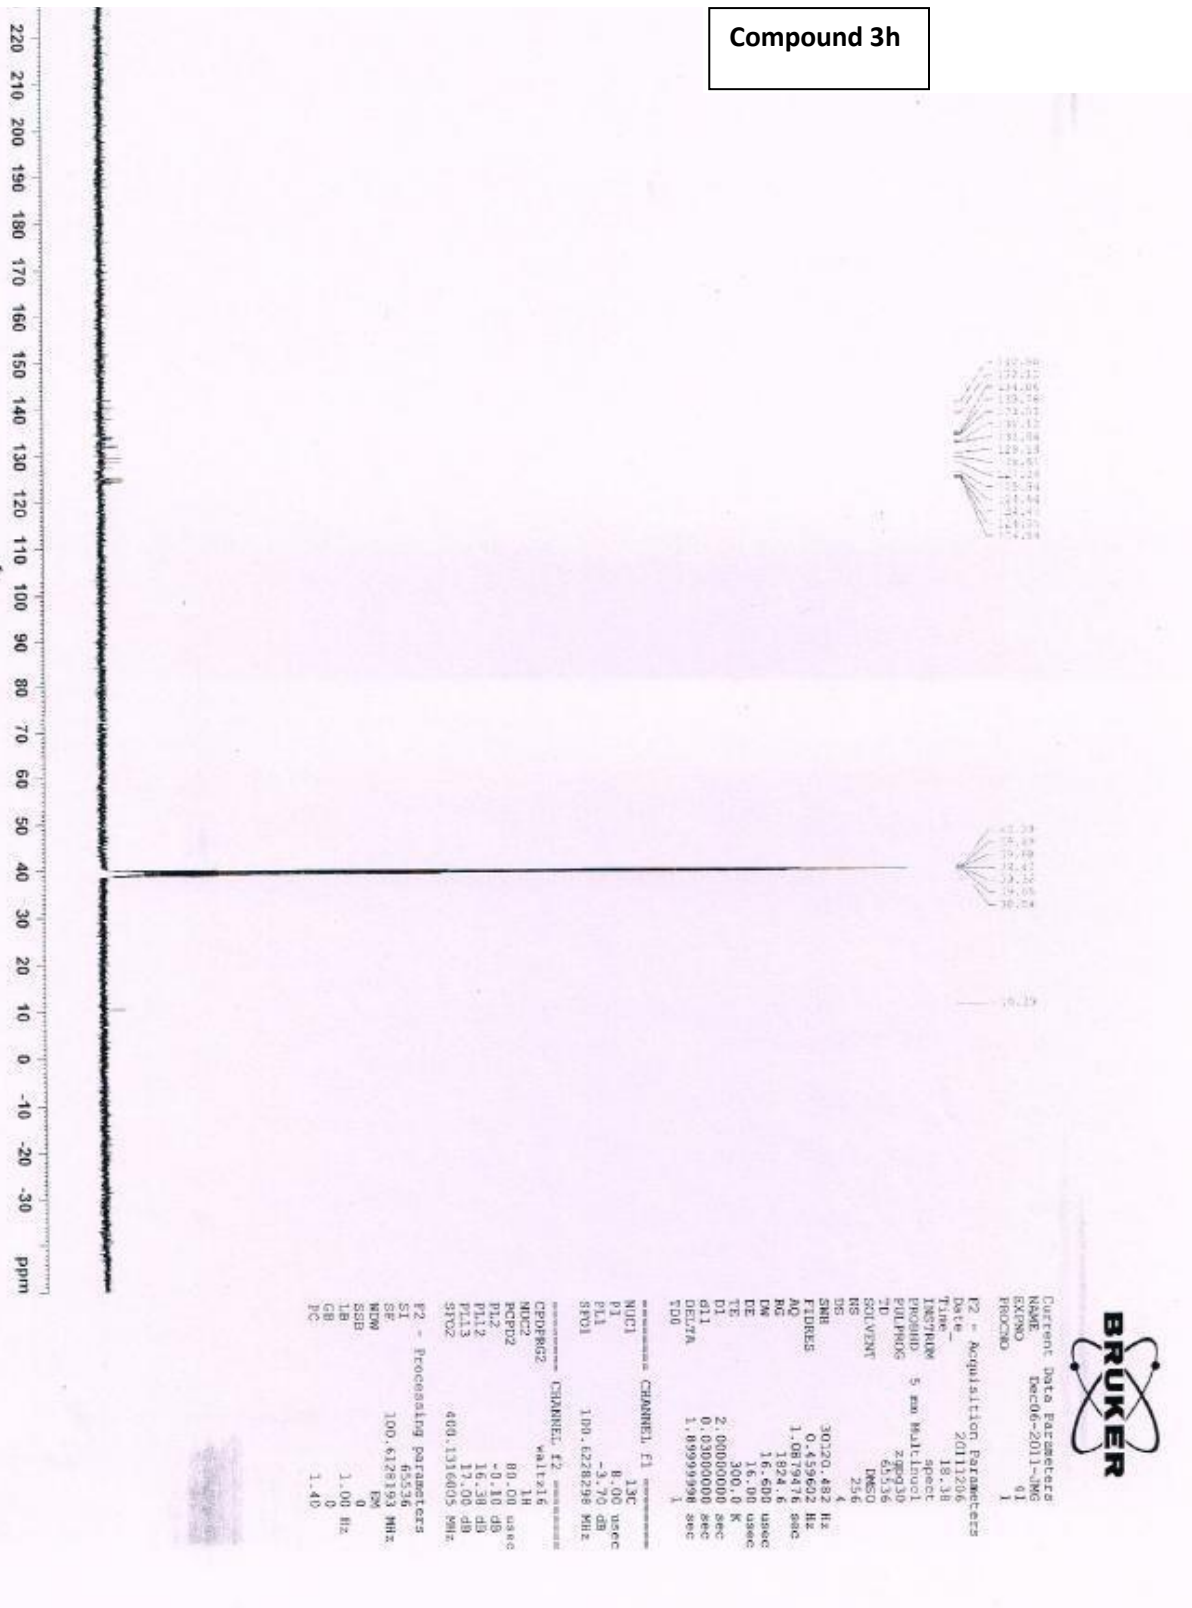

Compound 3h

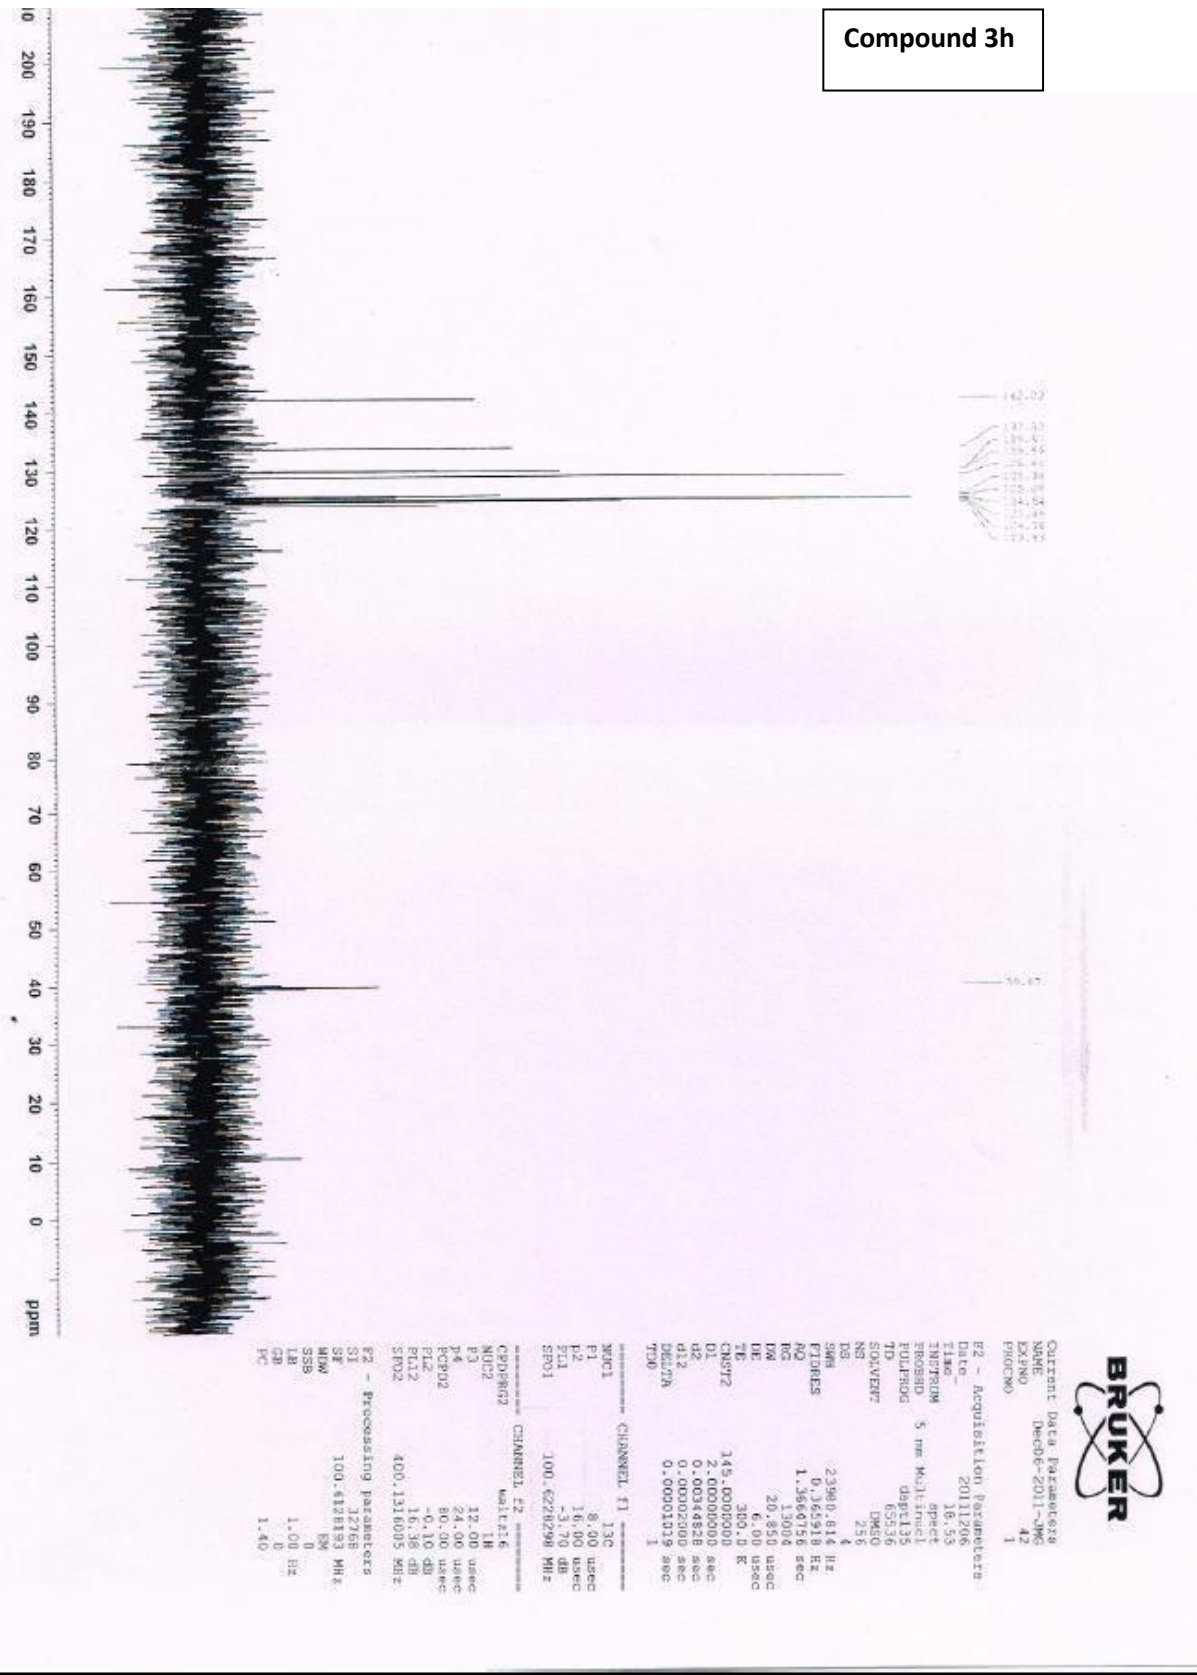

# Compound 3h

## Single Mass Analysis

Tolerance = 5.0 PPM / DBE: min = -1.5, max = 50.0

Isotope cluster parameters: Separation = 1.0 Abundance = 1.0%

Monoisotopic Mass, Odd and Even Electron Ions

593 formula(e) evaluated with 5 results within limits (all results (up to 1000) for each mass)

Asiam MTMS-8

1211465HnAFAMM 67 (1.099) Cm (67.69)

Cone= 30V  
1: TOF MS ES-  
30.8

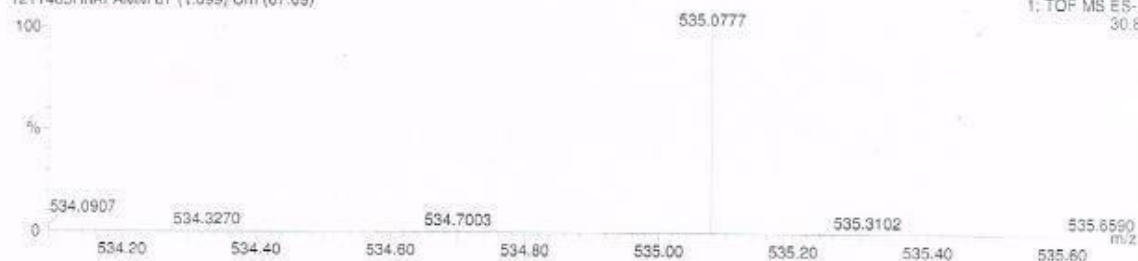

Minimum: 30.00  
Maximum: 100.00

200.0 5.0 50.0

| Mass     | RA     | Calc. Mass | mDa  | PPM  | DBE  | Score | Formula                |
|----------|--------|------------|------|------|------|-------|------------------------|
| 535.0777 | 100.00 | 535.0783   | -0.6 | -1.1 | 18.5 | n/a   | C25 H20 N6 O2 S2 Cl +e |
|          |        | 535.0769   | 0.8  | 1.4  | 13.5 | n/a   | C24 H24 N2 O6 S2 Cl +e |
|          |        | 535.0769   | 0.8  | 1.4  | 19.0 | n/a   | C23 H18 N9 O S2 Cl +e  |
|          |        | 535.0796   | -1.9 | -3.6 | 18.0 | n/a   | C27 H22 N3 O3 S2 Cl +e |
|          |        | 535.0756   | 2.1  | 3.9  | 14.0 | n/a   | C22 H22 N5 O5 S2 Cl +e |

Compound 3k

ght DMSO {E:\bruk300\data\2012\Feb\} JMG 51

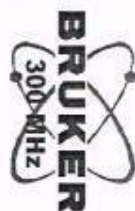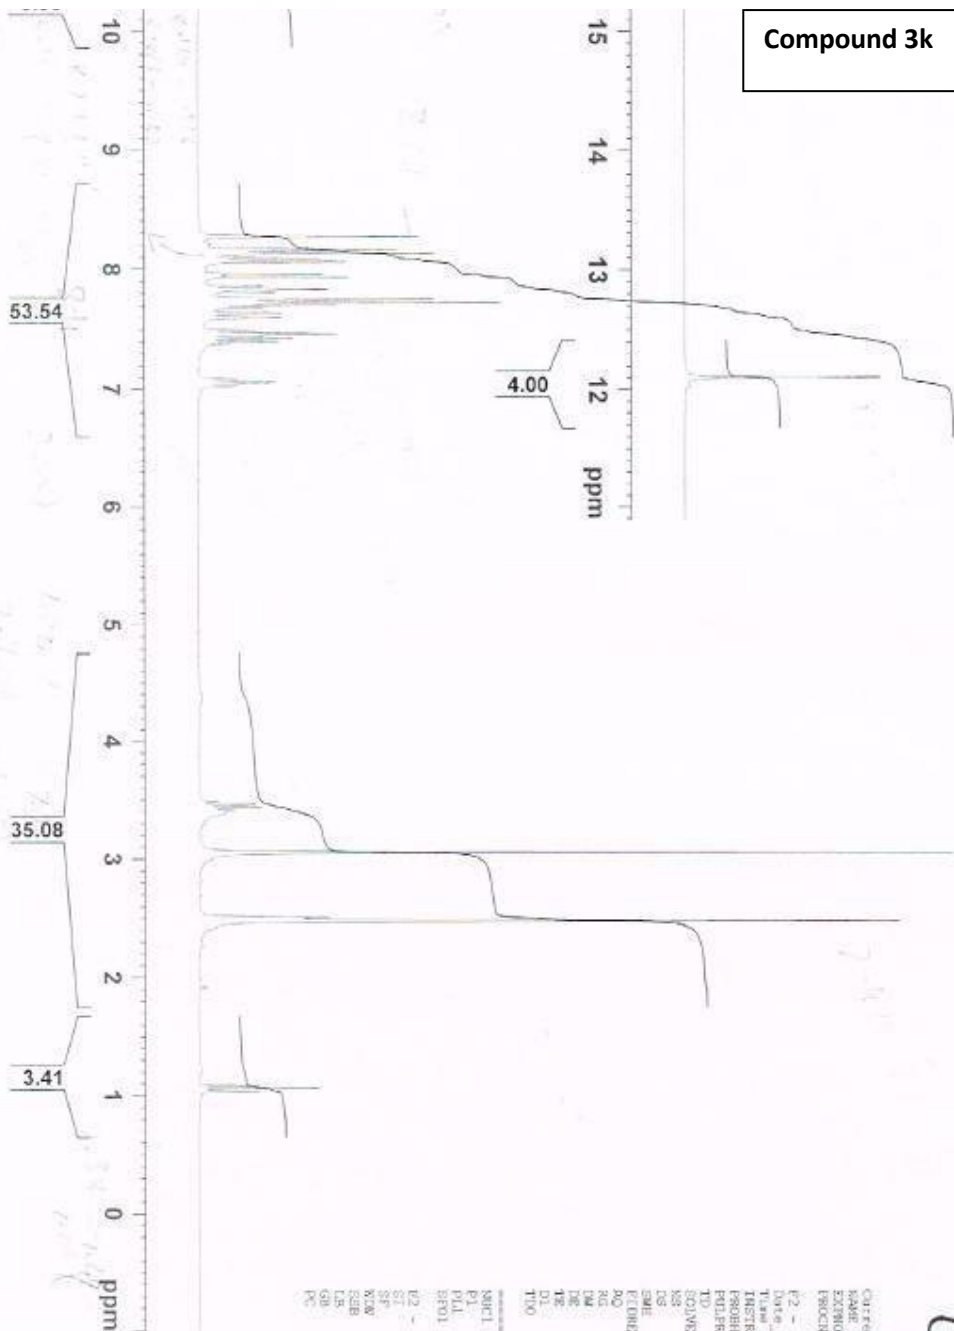

Current Data Parameters  
NAME 2012-02-29-385-51  
EXTNO 10  
PROCNO 1  
F2 - Acquisition Parameters  
Date\_ 20120306  
Time 12:42  
INSTRUM spect  
PROBHD 5 mm ERL 113C-1  
PULPROG zgpg30  
TD 65536  
SOLVENT DMSO  
NS 16  
DS 4  
SWH 6172.819 Hz  
FIDRES 0.096190 Hz  
AQ 5.368660 sec  
RG 181  
RM 0.000 usec  
DE 3.000 usec  
TE 300.2 K  
D1 0.1000000 sec  
T10  
===== CHANNEL f1 =====  
NUC1 1H  
P1 18.00 usec  
PL1 -2.60 dB  
PL10 299.951823 kHz  
F2 - Processing parameters  
SI 32768  
SF 299.950000 MHz  
WDW EM  
SSB 0  
GB 0.30 Hz  
PC 1.00



Compound 3k

Night DMSO {E:\bruk300\data\2012\Feb\} JMG 51

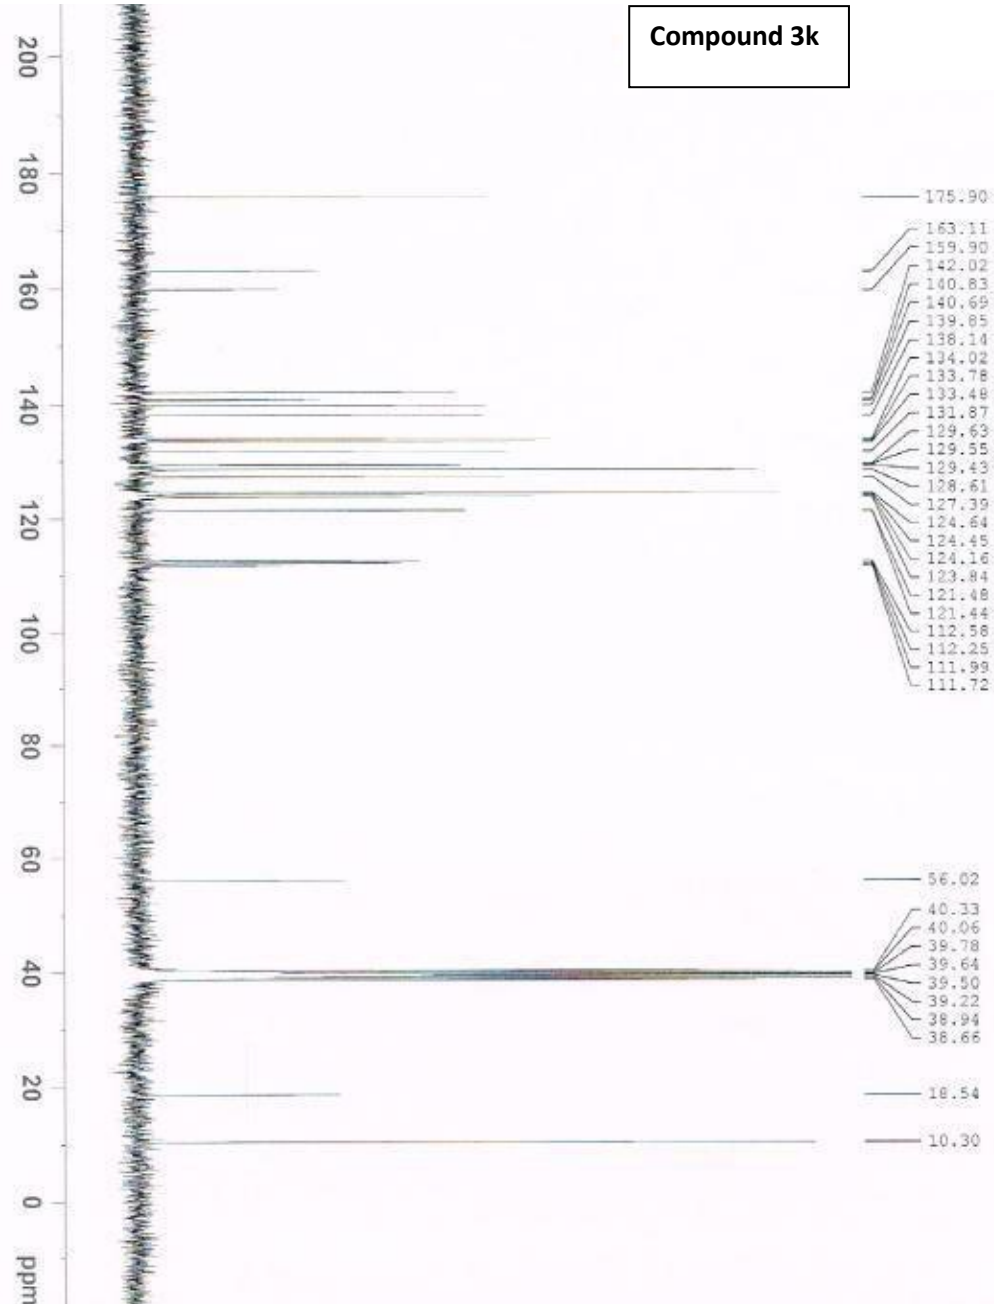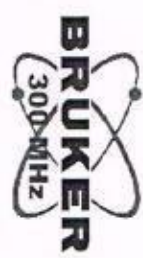

Current Data Parameters  
NAME 2012-02-25-50F-51  
EXPTNO 11  
PROCNO 1  
F2 - Acquisition Parameters  
Date\_ 20120206  
Time 7.39  
INSTRUM spect  
PROBHD 5 mm DUL 13C-1  
PULPROG zgpg30  
TD 65536  
SOLVENT DMSO  
NS 1024  
DS 2  
SWH 17857.143 Hz  
FIDRES 0.212478 Hz  
AQ 1.8350580 sec  
RG 91.95.2  
DB 28.000 usec  
DE 6.00 usec  
TE 300.0 K  
D1 2.00000000 sec  
d11 0.03000000 sec  
DELTA 1.89999996 sec  
TDO 1  
===== CHANNEL f1 =====  
NUC1 13C  
P1 10.00 usec  
PL1 -1.20 dB  
SFO1 75.480300 MHz  
===== CHANNEL f2 =====  
CPDPRG2 waltz16  
NUC2 1H  
P2 80.00 usec  
PL2 -2.50 dB  
F12 14.50 dB  
F13 15.00 dB  
SFO2 299.9512000 MHz  
F2 - Processing parameters  
SI 32768  
SF 75.425247 MHz  
WDW EM  
SSB 0  
LB 1.00 Hz  
GB 0  
PC 1.40



Tolerance = 5.0 PPM / DBE: min = 1.0, max = 99.0  
 Isotope cluster parameters: Separation = 1.0 Abundance = 1.0%

# Compound 3k

Monoisotopic Mass, Odd and Even Electron Ions  
 593 formula(e) evaluated with 5 results within limits (all results (up to 1000) for each mass)

Asiam MTMS-11  
 1211468HnAFAMM 52 (0.840) Cm (48-56)

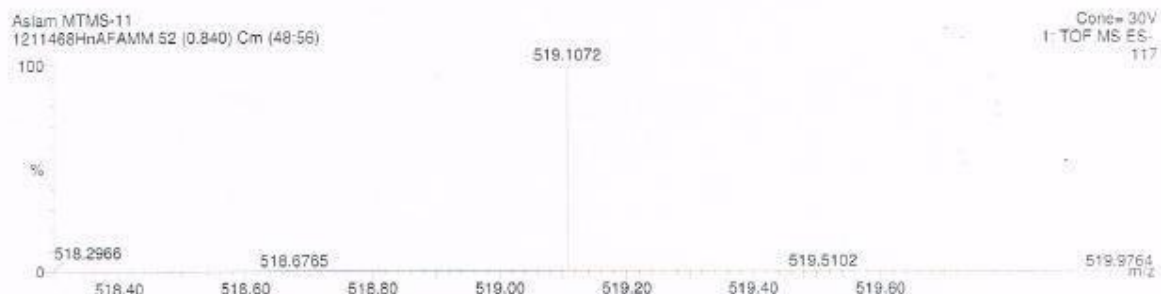

Minimum: 30.00  
 Maximum: 100.00

200.0 5.0 50.0

| Mass     | RA     | Calc. Mass | mDa  | PPM  | DBE  | Score | Formula               |
|----------|--------|------------|------|------|------|-------|-----------------------|
| 519.1072 | 100.00 | 519.1078   | -0.6 | -1.2 | 18.5 | n/a   | C25 H20 N6 O2 S2 F +e |
|          |        | 519.1065   | 0.7  | 1.4  | 13.5 | n/a   | C24 H24 N2 O6 S2 F +e |
|          |        | 519.1065   | 0.7  | 1.4  | 19.0 | n/a   | C23 H18 N9 O S2 F +e  |
|          |        | 519.1092   | -2.0 | -3.8 | 18.0 | n/a   | C27 H22 N3 O3 S2 F +e |
|          |        | 519.1051   | 2.1  | 4.0  | 14.0 | n/a   | C22 H22 N5 O5 S2 F +e |

# Compound 3l

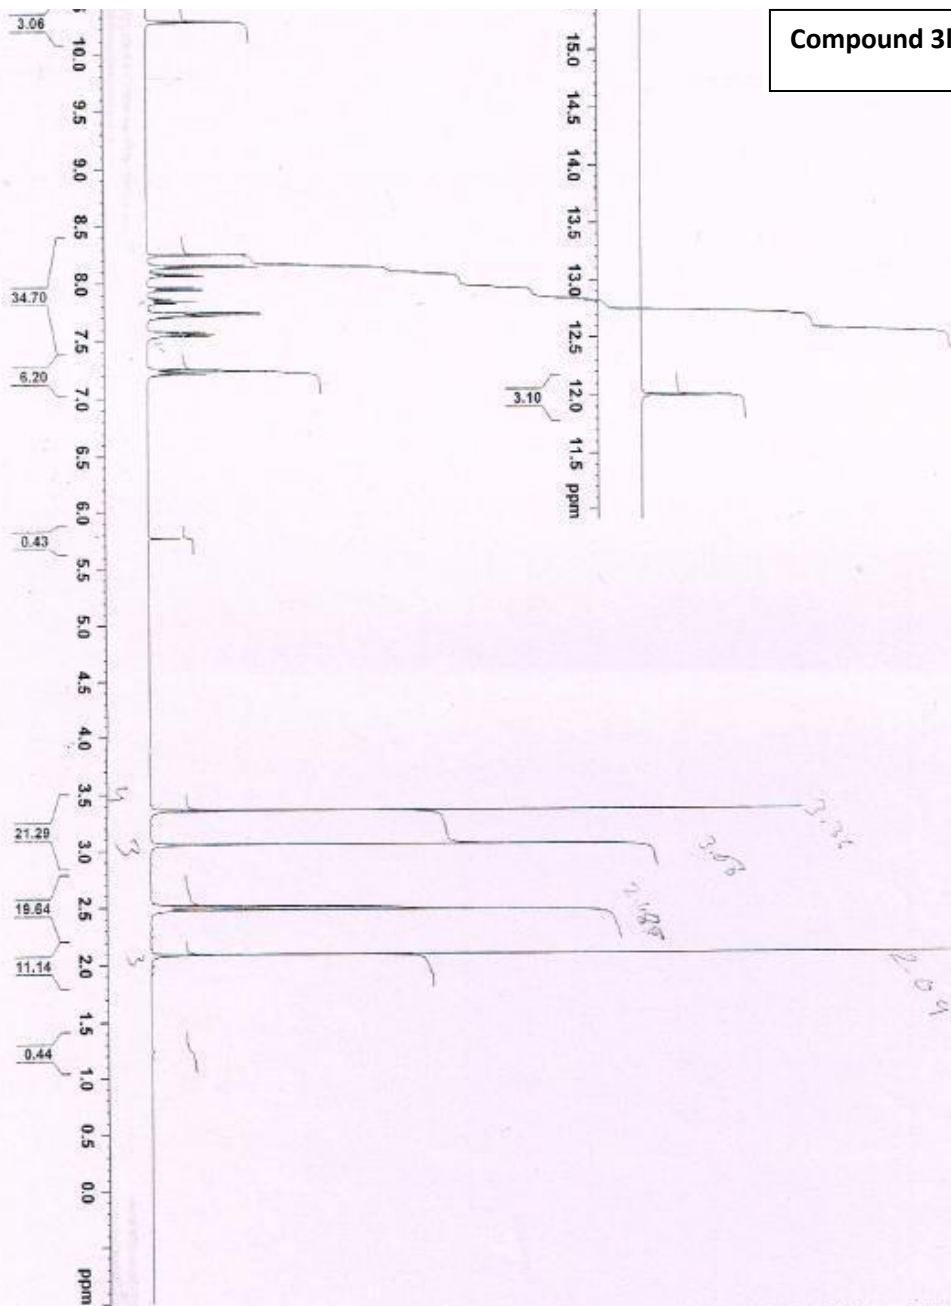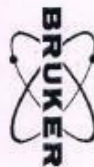

Current Data Parameters  
NAME: Max05-2012-7HS  
EXPNO: 20  
PROCNO: 1

F2 - Acquisition Parameters  
Date\_ 20120105  
Time 16.13  
INSTRUM spect  
PROBHD 5 mm Naltrinecl  
PULPROG zgpg30  
TD 65536  
SOLVENT DMSO  
NS 16  
DS 2  
SWH 8278.146 Hz  
FIDRES 0.12614 Hz  
AQ 1.504243 sec  
RG 287.4  
BW 60.400 kHz  
DE 6.00 kHz  
TE 300.0 K  
D1 1.80000000 sec  
T00 1

===== CHANNEL f1 =====  
NUC1 1H  
P1 18  
PL1 10.00 uPaG  
SFO1 400.1324710 MHz  
F2 - Processing parameters  
SI 65536  
SF 400.1300000 MHz  
WDW EM  
SSB 0  
LB 0.30 Hz  
GB 0  
PC 1.00



Compound 3l

DEPT135

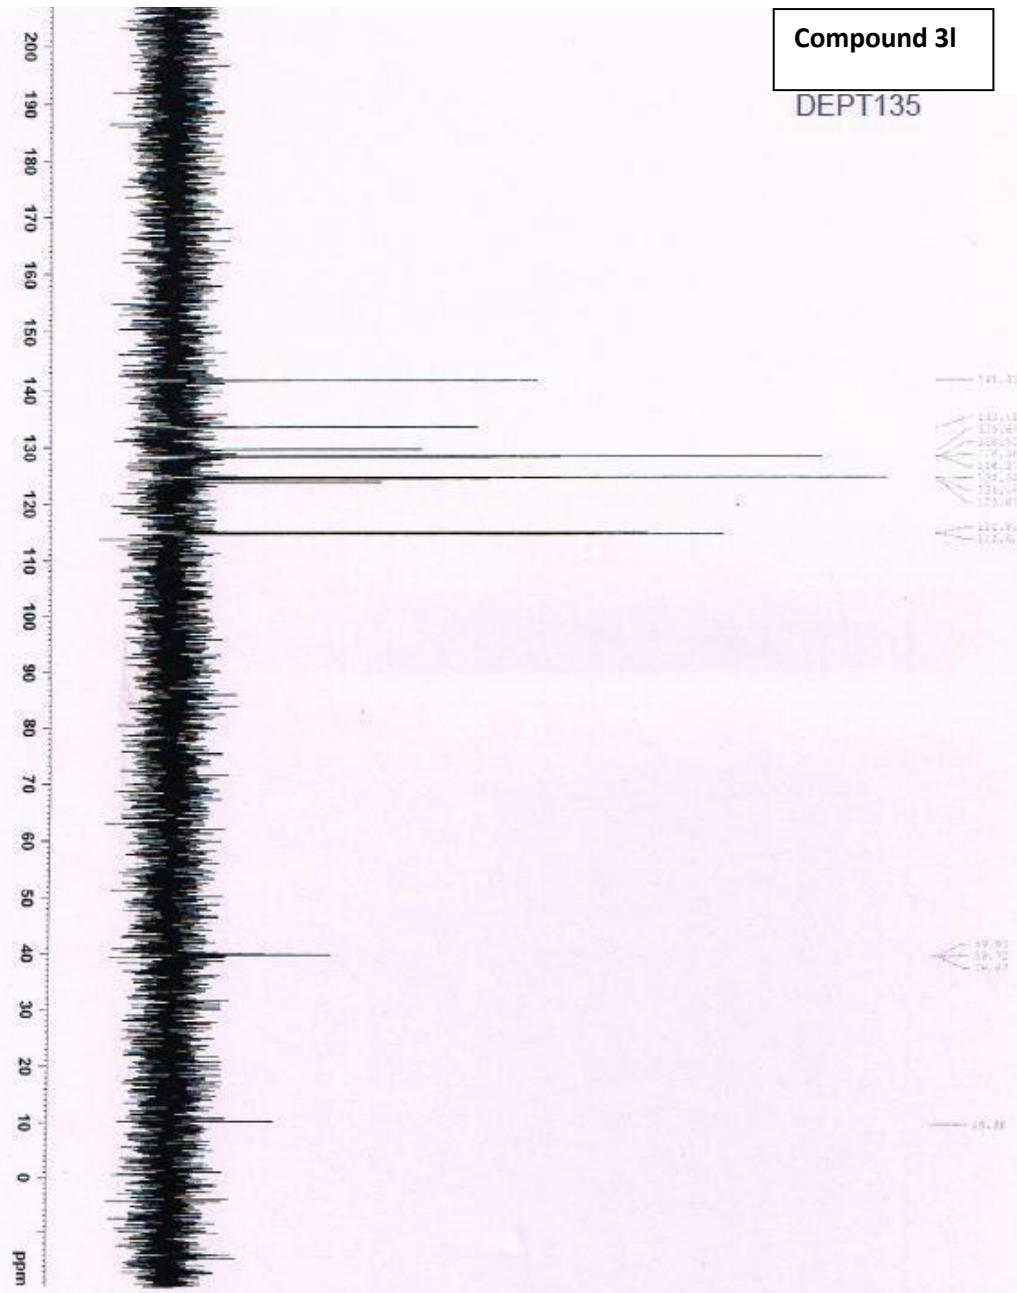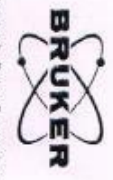

Current Data Parameters  
NAME: MARD-2012-JMG  
EXPER: 22  
PROCNO: 1  
F2 - Acquisition Parameters  
Date\_: 20120306  
Time: 5.19  
INSTRUM: spect  
PROBHD: 5 mm BBO1HNP2  
PULPROG: zgpg30  
TD: 65536  
SOLVENT: DMSO  
NS: 256  
DS: 4  
SWH: 23980.814 Hz  
FIDRES: 0.365118 Hz  
AQ: 1.3664756 sec  
RG: 8192  
BQ: 8192  
BW: 20.858 usec  
DE: 6.00 usec  
TE: 300.2 K  
CSTRT: 145.0000000 sec  
D1: 3.00000000 sec  
d2: 3.00344828 sec  
d12: 0.00002000 sec  
DELTA: 0.00001019 sec  
TDO: 1  
===== CHANNEL f1 =====  
NUC1: 13C  
P1: 8.00 usec  
P2: 16.00 usec  
PL1: 0 dB  
PL2: 0 dB  
SFO1: 100.628193 MHz  
===== CHANNEL f2 =====  
NUC2: 1H  
P1: 12.00 usec  
P2: 24.00 usec  
PL1: 0 dB  
PL2: -9.10 dB  
SFO2: 400.1516005 MHz  
F2 - Processing parameters  
SI: 32768  
SF: 100.6128193 MHz  
WDW: EM  
SSB: 0  
LB: 1.00 Hz  
GB: 0  
PC: 1.40

### Single Mass Analysis

Tolerance = 5.0 PPM / DBE: min = -1.5, max = 50.0

Isotope cluster parameters: Separation = 1.0 Abundance = 1.0%

Compound 3I

Monoisotopic Mass, Odd and Even Electron Ions

593 formula(e) evaluated with 4 results within limits (all results (up to 1000) for each mass)

asiam MTMS-12

212189HnAFAMM 67 (1.097) Cm (65:70)

Cone= 30V  
1: TOF MS ES-  
36.6

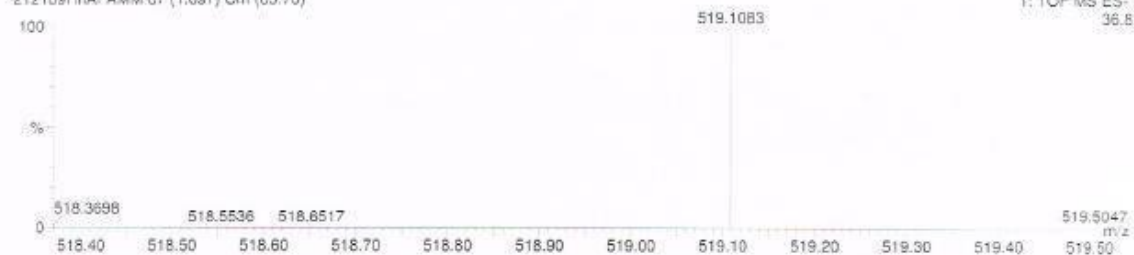

Minimum: 30.00  
Maximum: 100.00

| Mass     | RA     | Calc. Mass | mDa  | PPM  | DBE  | Score | Formula               |
|----------|--------|------------|------|------|------|-------|-----------------------|
| 519.1083 | 100.00 | 519.1078   | 0.5  | 0.9  | 18.5 | n/a   | C25 H20 N5 O2 F S2 +e |
|          |        | 519.1092   | -0.9 | -1.7 | 18.0 | n/a   | C27 H22 N3 O3 F S2 +e |
|          |        | 519.1065   | 1.8  | 3.5  | 13.5 | n/a   | C24 H24 N2 O6 F S2 +e |
|          |        | 519.1065   | 1.8  | 3.5  | 19.0 | n/a   | C23 H18 N9 O F S2 +e  |

| Mass     | RA     | Calc. Mass | mDa  | PPM  | DBE  | Score | Formula               |
|----------|--------|------------|------|------|------|-------|-----------------------|
| 519.1083 | 100.00 | 519.1078   | 0.5  | 0.9  | 18.5 | n/a   | C25 H20 N5 O2 F S2 +e |
|          |        | 519.1092   | -0.9 | -1.7 | 18.0 | n/a   | C27 H22 N3 O3 F S2 +e |
|          |        | 519.1065   | 1.8  | 3.5  | 13.5 | n/a   | C24 H24 N2 O6 F S2 +e |
|          |        | 519.1065   | 1.8  | 3.5  | 19.0 | n/a   | C23 H18 N9 O F S2 +e  |

# Compound 3m

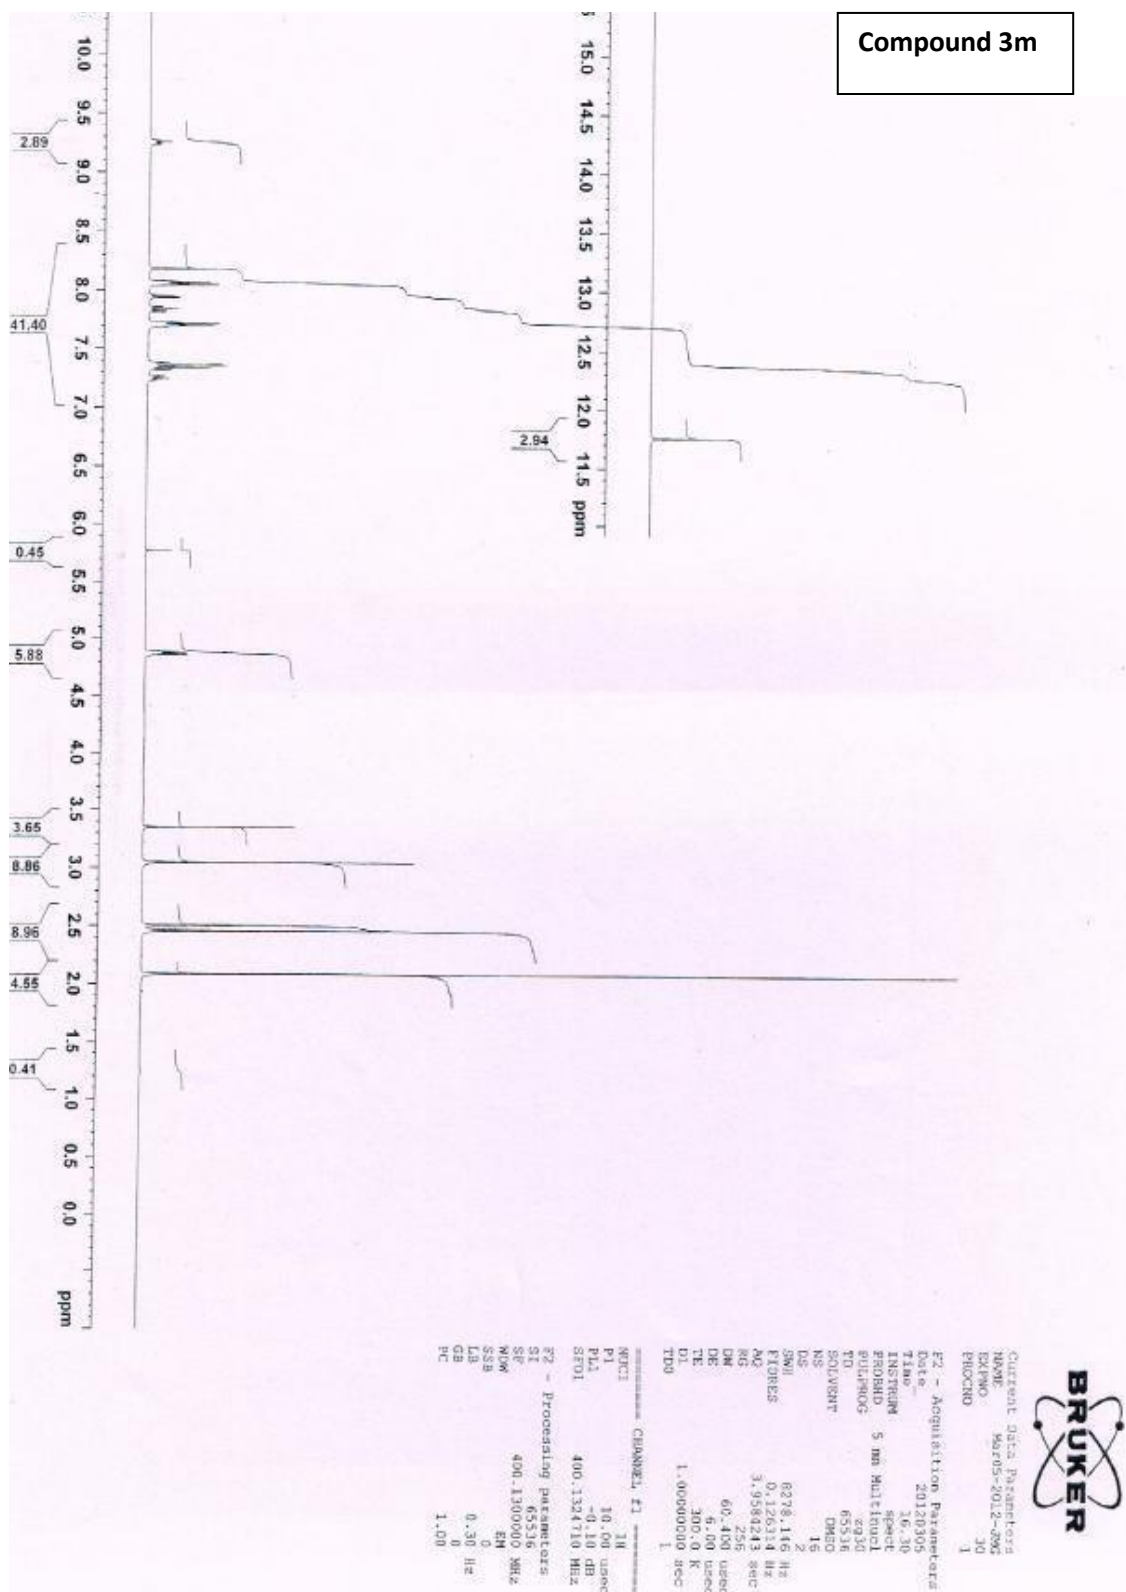



Compound 3m

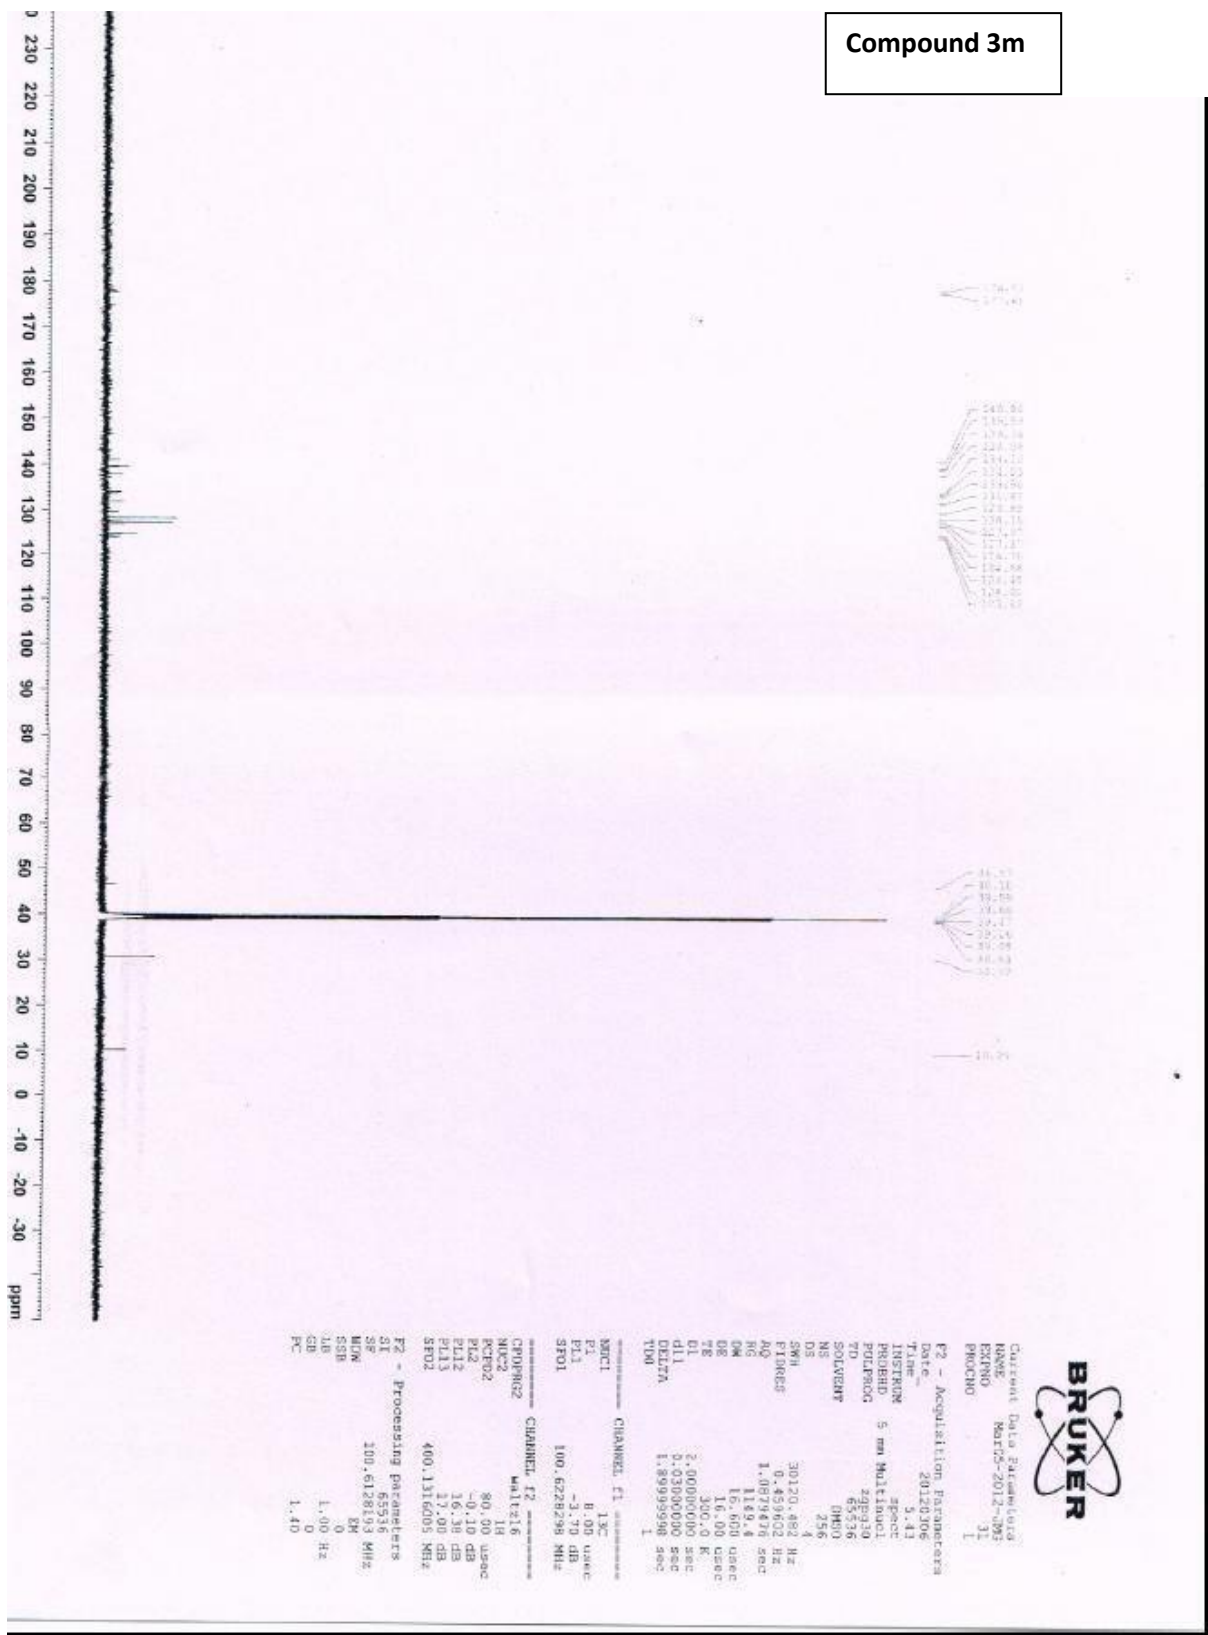



## Page 1

Tolerance = 5.0 PPM / DBE: min = -1.5, max = 50.0

Isotope cluster parameters: Separation = 1.0 Abundance = 1.0%

Monoisotopic Mass, Odd and Even Electron Ions

676 formula(e) evaluated with 5 results within limits (all results (up to 1000) for each mass)

aslam MTMS-13  
212190HnAFAMM 79 (1.288) Cm (78.89)

1: TOF MS ES-  
60.8

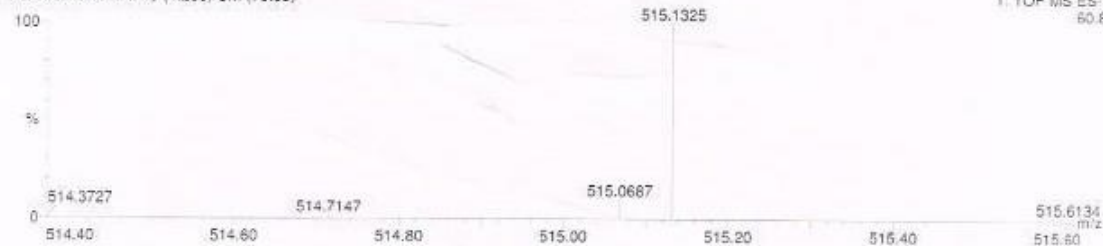

|          |       |  |  |  |  |      |  |  |  |  |  |  |  |  |  |  |  |  |  |  |  |  |  |  |  |  |  |  |  |  |  |  |  |  |  |  |  |  |  |  |  |  |  |  |  |  |  |  |  |  |  |  |  |  |  |  |  |  |  |  |  |  |  |  |  |  |  |  |  |  |  |  |  |  |  |  |  |  |  |  |  |  |  |  |  |  |  |  |  |  |  |  |  |  |  |  |  |  |  |  |  |  |  |  |  |  |  |  |  |  |  |  |  |  |  |  |  |  |  |  |  |  |  |  |  |  |  |  |  |  |  |  |  |  |  |  |  |  |  |  |  |  |  |  |  |  |  |  |  |  |  |  |  |  |  |  |  |  |  |  |  |  |  |  |  |  |  |  |  |  |  |  |  |  |  |  |  |  |  |  |  |  |  |  |  |  |  |  |  |  |  |  |  |  |  |  |  |  |  |  |  |  |  |  |  |  |  |  |  |  |  |  |  |  |  |  |  |  |  |  |  |  |  |  |  |  |  |  |  |  |  |  |  |  |  |  |  |  |  |  |  |  |  |  |  |  |  |  |  |  |  |  |  |  |  |  |  |  |  |  |  |  |  |  |  |  |  |  |  |  |  |  |  |  |  |  |  |  |  |  |  |  |  |  |  |  |  |  |  |  |  |  |  |  |  |  |  |  |  |  |  |  |  |  |  |  |  |  |  |  |  |  |  |  |  |  |  |  |  |  |  |  |  |  |  |  |  |  |  |  |  |  |  |  |  |  |  |  |  |  |  |  |  |  |  |  |  |  |  |  |  |  |  |  |  |  |  |  |  |  |  |  |  |  |  |  |  |  |  |  |  |  |  |  |  |  |  |  |  |  |  |  |  |  |  |  |  |  |  |  |  |  |  |  |  |  |  |  |  |  |  |  |  |  |  |  |  |  |  |  |  |  |  |  |  |  |  |  |  |  |  |  |  |  |  |  |  |  |  |  |  |  |  |  |  |  |  |  |  |  |  |  |  |  |  |  |  |  |  |  |  |  |  |  |  |  |  |  |  |  |  |  |  |  |  |  |  |  |  |  |  |  |  |  |  |  |  |  |  |  |  |  |  |  |  |  |  |  |  |  |  |  |  |  |  |  |  |  |  |  |  |  |  |  |  |  |  |  |  |  |  |  |  |  |  |  |  |  |  |  |  |  |  |  |  |  |  |  |  |  |  |  |  |  |  |  |  |  |  |  |  |  |  |  |  |  |  |  |  |  |  |  |  |  |  |  |  |  |  |  |  |  |  |  |  |  |  |  |  |  |  |  |  |  |  |  |  |  |  |  |  |  |  |  |  |  |  |  |  |  |  |  |  |  |  |  |  |  |  |  |  |  |  |  |  |  |  |  |  |  |  |  |  |  |  |  |  |  |  |  |  |  |  |  |  |  |  |  |  |  |  |  |  |  |  |  |  |  |  |  |  |  |  |  |  |  |  |  |  |  |  |  |  |  |  |  |  |  |  |  |  |  |  |  |  |  |  |  |  |  |  |  |  |  |  |  |  |  |  |  |  |  |  |  |  |  |  |  |  |  |  |  |  |  |  |  |  |  |  |  |  |  |  |  |  |  |  |  |  |  |  |  |  |  |  |  |  |  |  |  |  |  |  |  |  |  |  |  |  |  |  |  |  |  |  |  |  |  |  |  |  |  |  |  |  |  |  |  |  |  |  |  |  |  |  |  |  |  |  |  |  |  |  |  |  |  |  |  |  |  |  |  |  |  |  |  |  |  |  |  |  |  |  |  |  |  |  |  |  |  |  |  |  |  |  |  |  |  |  |  |  |  |  |  |  |  |  |  |  |  |  |  |  |  |  |  |  |  |  |  |  |  |  |  |  |  |  |  |  |  |  |  |  |  |  |  |  |  |  |  |  |  |  |  |  |  |  |  |  |  |  |  |  |  |  |  |  |  |  |  |  |  |  |  |  |  |  |  |  |  |  |  |  |  |  |  |  |  |  |  |  |  |  |  |  |  |  |  |  |  |  |  |  |  |  |  |  |  |  |  |  |  |  |  |  |  |  |  |  |  |  |  |  |  |  |  |  |  |  |  |  |  |  |  |  |  |  |  |  |  |  |  |  |  |  |  |  |  |  |  |  |  |  |  |  |  |  |  |  |  |  |  |  |  |  |  |  |  |  |  |  |  |  |  |  |  |  |  |  |  |  |  |  |  |  |  |  |  |  |  |  |  |  |  |  |  |  |  |  |  |  |  |  |  |  |  |  |  |  |  |  |  |  |  |  |  |  |  |  |  |  |  |  |  |  |  |  |  |  |  |  |  |  |  |  |  |  |  |  |  |  |  |  |  |  |  |  |  |  |  |  |  |  |  |  |  |  |  |  |  |  |  |  |  |  |  |  |  |  |  |  |  |  |  |  |  |  |  |  |  |  |  |  |  |  |  |  |  |  |  |  |  |  |  |  |  |  |  |  |  |  |  |  |  |  |  |  |  |  |  |  |  |  |  |  |  |  |  |  |  |  |  |  |  |  |  |  |  |  |  |  |  |  |  |  |  |  |  |  |  |  |  |  |  |  |  |  |  |  |  |  |  |  |  |  |  |  |  |  |  |  |  |  |  |  |  |  |  |  |  |  |  |  |  |  |  |  |  |  |  |  |  |  |  |  |  |  |  |  |  |  |  |  |  |  |  |  |  |  |  |  |  |  |  |  |  |  |  |  |  |  |  |  |  |  |  |  |  |  |  |  |  |  |  |  |  |  |  |  |  |  |  |  |  |  |  |  |  |  |  |  |  |  |  |  |  |  |  |  |  |  |  |  |  |  |  |  |  |  |  |  |  |  |  |  |  |  |  |  |  |  |  |  |  |  |  |  |  |  |  |  |  |  |  |  |  |  |  |  |  |  |  |  |  |  |  |  |  |  |  |  |  |  |  |  |  |  |  |  |  |  |  |  |  |  |  |  |  |  |  |  |  |  |  |  |  |  |  |  |  |  |  |  |  |  |  |  |  |  |  |  |  |  |  |  |  |  |  |  |  |  |  |  |  |  |  |  |  |  |  |  |  |  |  |  |  |  |  |  |  |  |  |  |  |  |  |  |  |  |  |  |  |  |  |  |  |  |  |  |  |  |  |  |  |  |  |  |  |    |
|----------|-------|--|--|--|--|------|--|--|--|--|--|--|--|--|--|--|--|--|--|--|--|--|--|--|--|--|--|--|--|--|--|--|--|--|--|--|--|--|--|--|--|--|--|--|--|--|--|--|--|--|--|--|--|--|--|--|--|--|--|--|--|--|--|--|--|--|--|--|--|--|--|--|--|--|--|--|--|--|--|--|--|--|--|--|--|--|--|--|--|--|--|--|--|--|--|--|--|--|--|--|--|--|--|--|--|--|--|--|--|--|--|--|--|--|--|--|--|--|--|--|--|--|--|--|--|--|--|--|--|--|--|--|--|--|--|--|--|--|--|--|--|--|--|--|--|--|--|--|--|--|--|--|--|--|--|--|--|--|--|--|--|--|--|--|--|--|--|--|--|--|--|--|--|--|--|--|--|--|--|--|--|--|--|--|--|--|--|--|--|--|--|--|--|--|--|--|--|--|--|--|--|--|--|--|--|--|--|--|--|--|--|--|--|--|--|--|--|--|--|--|--|--|--|--|--|--|--|--|--|--|--|--|--|--|--|--|--|--|--|--|--|--|--|--|--|--|--|--|--|--|--|--|--|--|--|--|--|--|--|--|--|--|--|--|--|--|--|--|--|--|--|--|--|--|--|--|--|--|--|--|--|--|--|--|--|--|--|--|--|--|--|--|--|--|--|--|--|--|--|--|--|--|--|--|--|--|--|--|--|--|--|--|--|--|--|--|--|--|--|--|--|--|--|--|--|--|--|--|--|--|--|--|--|--|--|--|--|--|--|--|--|--|--|--|--|--|--|--|--|--|--|--|--|--|--|--|--|--|--|--|--|--|--|--|--|--|--|--|--|--|--|--|--|--|--|--|--|--|--|--|--|--|--|--|--|--|--|--|--|--|--|--|--|--|--|--|--|--|--|--|--|--|--|--|--|--|--|--|--|--|--|--|--|--|--|--|--|--|--|--|--|--|--|--|--|--|--|--|--|--|--|--|--|--|--|--|--|--|--|--|--|--|--|--|--|--|--|--|--|--|--|--|--|--|--|--|--|--|--|--|--|--|--|--|--|--|--|--|--|--|--|--|--|--|--|--|--|--|--|--|--|--|--|--|--|--|--|--|--|--|--|--|--|--|--|--|--|--|--|--|--|--|--|--|--|--|--|--|--|--|--|--|--|--|--|--|--|--|--|--|--|--|--|--|--|--|--|--|--|--|--|--|--|--|--|--|--|--|--|--|--|--|--|--|--|--|--|--|--|--|--|--|--|--|--|--|--|--|--|--|--|--|--|--|--|--|--|--|--|--|--|--|--|--|--|--|--|--|--|--|--|--|--|--|--|--|--|--|--|--|--|--|--|--|--|--|--|--|--|--|--|--|--|--|--|--|--|--|--|--|--|--|--|--|--|--|--|--|--|--|--|--|--|--|--|--|--|--|--|--|--|--|--|--|--|--|--|--|--|--|--|--|--|--|--|--|--|--|--|--|--|--|--|--|--|--|--|--|--|--|--|--|--|--|--|--|--|--|--|--|--|--|--|--|--|--|--|--|--|--|--|--|--|--|--|--|--|--|--|--|--|--|--|--|--|--|--|--|--|--|--|--|--|--|--|--|--|--|--|--|--|--|--|--|--|--|--|--|--|--|--|--|--|--|--|--|--|--|--|--|--|--|--|--|--|--|--|--|--|--|--|--|--|--|--|--|--|--|--|--|--|--|--|--|--|--|--|--|--|--|--|--|--|--|--|--|--|--|--|--|--|--|--|--|--|--|--|--|--|--|--|--|--|--|--|--|--|--|--|--|--|--|--|--|--|--|--|--|--|--|--|--|--|--|--|--|--|--|--|--|--|--|--|--|--|--|--|--|--|--|--|--|--|--|--|--|--|--|--|--|--|--|--|--|--|--|--|--|--|--|--|--|--|--|--|--|--|--|--|--|--|--|--|--|--|--|--|--|--|--|--|--|--|--|--|--|--|--|--|--|--|--|--|--|--|--|--|--|--|--|--|--|--|--|--|--|--|--|--|--|--|--|--|--|--|--|--|--|--|--|--|--|--|--|--|--|--|--|--|--|--|--|--|--|--|--|--|--|--|--|--|--|--|--|--|--|--|--|--|--|--|--|--|--|--|--|--|--|--|--|--|--|--|--|--|--|--|--|--|--|--|--|--|--|--|--|--|--|--|--|--|--|--|--|--|--|--|--|--|--|--|--|--|--|--|--|--|--|--|--|--|--|--|--|--|--|--|--|--|--|--|--|--|--|--|--|--|--|--|--|--|--|--|--|--|--|--|--|--|--|--|--|--|--|--|--|--|--|--|--|--|--|--|--|--|--|--|--|--|--|--|--|--|--|--|--|--|--|--|--|--|--|--|--|--|--|--|--|--|--|--|--|--|--|--|--|--|--|--|--|--|--|--|--|--|--|--|--|--|--|--|--|--|--|--|--|--|--|--|--|--|--|--|--|--|--|--|--|--|--|--|--|--|--|--|--|--|--|--|--|--|--|--|--|--|--|--|--|--|--|--|--|--|--|--|--|--|--|--|--|--|--|--|--|--|--|--|--|--|--|--|--|--|--|--|--|--|--|--|--|--|--|--|--|--|--|--|--|--|--|--|--|--|--|--|--|--|--|--|--|--|--|--|--|--|--|--|--|--|--|--|--|--|--|--|--|--|--|--|--|--|--|--|--|--|--|--|--|--|--|--|--|--|--|--|--|--|--|--|--|--|--|--|--|--|--|--|--|--|--|--|--|--|--|--|--|--|--|--|--|--|--|--|--|--|--|--|--|--|--|--|--|--|--|--|--|--|--|--|--|--|--|--|--|--|--|--|--|--|--|--|--|--|--|--|--|--|--|--|--|--|--|--|--|--|--|--|--|--|--|--|--|--|--|--|--|--|--|--|--|--|--|--|--|--|--|--|--|--|--|--|--|--|--|--|--|--|--|--|--|--|--|--|--|--|--|--|--|--|--|--|--|--|--|--|--|--|--|--|--|--|--|--|--|--|--|--|--|--|--|--|--|--|--|--|--|--|--|--|--|--|--|--|--|--|--|--|--|--|--|--|--|--|--|--|--|--|--|--|--|--|--|--|--|--|--|--|--|--|--|--|--|--|--|--|--|--|--|--|--|--|--|--|--|--|--|--|--|----|
| Minimum: | 30.00 |  |  |  |  | -1.5 |  |  |  |  |  |  |  |  |  |  |  |  |  |  |  |  |  |  |  |  |  |  |  |  |  |  |  |  |  |  |  |  |  |  |  |  |  |  |  |  |  |  |  |  |  |  |  |  |  |  |  |  |  |  |  |  |  |  |  |  |  |  |  |  |  |  |  |  |  |  |  |  |  |  |  |  |  |  |  |  |  |  |  |  |  |  |  |  |  |  |  |  |  |  |  |  |  |  |  |  |  |  |  |  |  |  |  |  |  |  |  |  |  |  |  |  |  |  |  |  |  |  |  |  |  |  |  |  |  |  |  |  |  |  |  |  |  |  |  |  |  |  |  |  |  |  |  |  |  |  |  |  |  |  |  |  |  |  |  |  |  |  |  |  |  |  |  |  |  |  |  |  |  |  |  |  |  |  |  |  |  |  |  |  |  |  |  |  |  |  |  |  |  |  |  |  |  |  |  |  |  |  |  |  |  |  |  |  |  |  |  |  |  |  |  |  |  |  |  |  |  |  |  |  |  |  |  |  |  |  |  |  |  |  |  |  |  |  |  |  |  |  |  |  |  |  |  |  |  |  |  |  |  |  |  |  |  |  |  |  |  |  |  |  |  |  |  |  |  |  |  |  |  |  |  |  |  |  |  |  |  |  |  |  |  |  |  |  |  |  |  |  |  |  |  |  |  |  |  |  |  |  |  |  |  |  |  |  |  |  |  |  |  |  |  |  |  |  |  |  |  |  |  |  |  |  |  |  |  |  |  |  |  |  |  |  |  |  |  |  |  |  |  |  |  |  |  |  |  |  |  |  |  |  |  |  |  |  |  |  |  |  |  |  |  |  |  |  |  |  |  |  |  |  |  |  |  |  |  |  |  |  |  |  |  |  |  |  |  |  |  |  |  |  |  |  |  |  |  |  |  |  |  |  |  |  |  |  |  |  |  |  |  |  |  |  |  |  |  |  |  |  |  |  |  |  |  |  |  |  |  |  |  |  |  |  |  |  |  |  |  |  |  |  |  |  |  |  |  |  |  |  |  |  |  |  |  |  |  |  |  |  |  |  |  |  |  |  |  |  |  |  |  |  |  |  |  |  |  |  |  |  |  |  |  |  |  |  |  |  |  |  |  |  |  |  |  |  |  |  |  |  |  |  |  |  |  |  |  |  |  |  |  |  |  |  |  |  |  |  |  |  |  |  |  |  |  |  |  |  |  |  |  |  |  |  |  |  |  |  |  |  |  |  |  |  |  |  |  |  |  |  |  |  |  |  |  |  |  |  |  |  |  |  |  |  |  |  |  |  |  |  |  |  |  |  |  |  |  |  |  |  |  |  |  |  |  |  |  |  |  |  |  |  |  |  |  |  |  |  |  |  |  |  |  |  |  |  |  |  |  |  |  |  |  |  |  |  |  |  |  |  |  |  |  |  |  |  |  |  |  |  |  |  |  |  |  |  |  |  |  |  |  |  |  |  |  |  |  |  |  |  |  |  |  |  |  |  |  |  |  |  |  |  |  |  |  |  |  |  |  |  |  |  |  |  |  |  |  |  |  |  |  |  |  |  |  |  |  |  |  |  |  |  |  |  |  |  |  |  |  |  |  |  |  |  |  |  |  |  |  |  |  |  |  |  |  |  |  |  |  |  |  |  |  |  |  |  |  |  |  |  |  |  |  |  |  |  |  |  |  |  |  |  |  |  |  |  |  |  |  |  |  |  |  |  |  |  |  |  |  |  |  |  |  |  |  |  |  |  |  |  |  |  |  |  |  |  |  |  |  |  |  |  |  |  |  |  |  |  |  |  |  |  |  |  |  |  |  |  |  |  |  |  |  |  |  |  |  |  |  |  |  |  |  |  |  |  |  |  |  |  |  |  |  |  |  |  |  |  |  |  |  |  |  |  |  |  |  |  |  |  |  |  |  |  |  |  |  |  |  |  |  |  |  |  |  |  |  |  |  |  |  |  |  |  |  |  |  |  |  |  |  |  |  |  |  |  |  |  |  |  |  |  |  |  |  |  |  |  |  |  |  |  |  |  |  |  |  |  |  |  |  |  |  |  |  |  |  |  |  |  |  |  |  |  |  |  |  |  |  |  |  |  |  |  |  |  |  |  |  |  |  |  |  |  |  |  |  |  |  |  |  |  |  |  |  |  |  |  |  |  |  |  |  |  |  |  |  |  |  |  |  |  |  |  |  |  |  |  |  |  |  |  |  |  |  |  |  |  |  |  |  |  |  |  |  |  |  |  |  |  |  |  |  |  |  |  |  |  |  |  |  |  |  |  |  |  |  |  |  |  |  |  |  |  |  |  |  |  |  |  |  |  |  |  |  |  |  |  |  |  |  |  |  |  |  |  |  |  |  |  |  |  |  |  |  |  |  |  |  |  |  |  |  |  |  |  |  |  |  |  |  |  |  |  |  |  |  |  |  |  |  |  |  |  |  |  |  |  |  |  |  |  |  |  |  |  |  |  |  |  |  |  |  |  |  |  |  |  |  |  |  |  |  |  |  |  |  |  |  |  |  |  |  |  |  |  |  |  |  |  |  |  |  |  |  |  |  |  |  |  |  |  |  |  |  |  |  |  |  |  |  |  |  |  |  |  |  |  |  |  |  |  |  |  |  |  |  |  |  |  |  |  |  |  |  |  |  |  |  |  |  |  |  |  |  |  |  |  |  |  |  |  |  |  |  |  |  |  |  |  |  |  |  |  |  |  |  |  |  |  |  |  |  |  |  |  |  |  |  |  |  |  |  |  |  |  |  |  |  |  |  |  |  |  |  |  |  |  |  |  |  |  |  |  |  |  |  |  |  |  |  |  |  |  |  |  |  |  |  |  |  |  |  |  |  |  |  |  |  |  |  |  |  |  |  |  |  |  |  |  |  |  |  |  |  |  |  |  |  |  |  |  |  |  |  |  |  |  |  |  |  |  |  |  |  |  |  |  |  |  |  |  |  |  |  |  |  |  |  |  |  |  |  |  |  |  |  |  |  |  |  |  |  |  |  |  |  |  |  |  |  |  |  |  |  |  |  |  |  |  |  |  |  |  |  |  |  |  |  |  |  |  |  |  |  |  |  |  |  |  |  |  |  |  |  |  |  |  |  |  |  |  |  |  |  |  |  |  |  |  | </ |
|----------|-------|--|--|--|--|------|--|--|--|--|--|--|--|--|--|--|--|--|--|--|--|--|--|--|--|--|--|--|--|--|--|--|--|--|--|--|--|--|--|--|--|--|--|--|--|--|--|--|--|--|--|--|--|--|--|--|--|--|--|--|--|--|--|--|--|--|--|--|--|--|--|--|--|--|--|--|--|--|--|--|--|--|--|--|--|--|--|--|--|--|--|--|--|--|--|--|--|--|--|--|--|--|--|--|--|--|--|--|--|--|--|--|--|--|--|--|--|--|--|--|--|--|--|--|--|--|--|--|--|--|--|--|--|--|--|--|--|--|--|--|--|--|--|--|--|--|--|--|--|--|--|--|--|--|--|--|--|--|--|--|--|--|--|--|--|--|--|--|--|--|--|--|--|--|--|--|--|--|--|--|--|--|--|--|--|--|--|--|--|--|--|--|--|--|--|--|--|--|--|--|--|--|--|--|--|--|--|--|--|--|--|--|--|--|--|--|--|--|--|--|--|--|--|--|--|--|--|--|--|--|--|--|--|--|--|--|--|--|--|--|--|--|--|--|--|--|--|--|--|--|--|--|--|--|--|--|--|--|--|--|--|--|--|--|--|--|--|--|--|--|--|--|--|--|--|--|--|--|--|--|--|--|--|--|--|--|--|--|--|--|--|--|--|--|--|--|--|--|--|--|--|--|--|--|--|--|--|--|--|--|--|--|--|--|--|--|--|--|--|--|--|--|--|--|--|--|--|--|--|--|--|--|--|--|--|--|--|--|--|--|--|--|--|--|--|--|--|--|--|--|--|--|--|--|--|--|--|--|--|--|--|--|--|--|--|--|--|--|--|--|--|--|--|--|--|--|--|--|--|--|--|--|--|--|--|--|--|--|--|--|--|--|--|--|--|--|--|--|--|--|--|--|--|--|--|--|--|--|--|--|--|--|--|--|--|--|--|--|--|--|--|--|--|--|--|--|--|--|--|--|--|--|--|--|--|--|--|--|--|--|--|--|--|--|--|--|--|--|--|--|--|--|--|--|--|--|--|--|--|--|--|--|--|--|--|--|--|--|--|--|--|--|--|--|--|--|--|--|--|--|--|--|--|--|--|--|--|--|--|--|--|--|--|--|--|--|--|--|--|--|--|--|--|--|--|--|--|--|--|--|--|--|--|--|--|--|--|--|--|--|--|--|--|--|--|--|--|--|--|--|--|--|--|--|--|--|--|--|--|--|--|--|--|--|--|--|--|--|--|--|--|--|--|--|--|--|--|--|--|--|--|--|--|--|--|--|--|--|--|--|--|--|--|--|--|--|--|--|--|--|--|--|--|--|--|--|--|--|--|--|--|--|--|--|--|--|--|--|--|--|--|--|--|--|--|--|--|--|--|--|--|--|--|--|--|--|--|--|--|--|--|--|--|--|--|--|--|--|--|--|--|--|--|--|--|--|--|--|--|--|--|--|--|--|--|--|--|--|--|--|--|--|--|--|--|--|--|--|--|--|--|--|--|--|--|--|--|--|--|--|--|--|--|--|--|--|--|--|--|--|--|--|--|--|--|--|--|--|--|--|--|--|--|--|--|--|--|--|--|--|--|--|--|--|--|--|--|--|--|--|--|--|--|--|--|--|--|--|--|--|--|--|--|--|--|--|--|--|--|--|--|--|--|--|--|--|--|--|--|--|--|--|--|--|--|--|--|--|--|--|--|--|--|--|--|--|--|--|--|--|--|--|--|--|--|--|--|--|--|--|--|--|--|--|--|--|--|--|--|--|--|--|--|--|--|--|--|--|--|--|--|--|--|--|--|--|--|--|--|--|--|--|--|--|--|--|--|--|--|--|--|--|--|--|--|--|--|--|--|--|--|--|--|--|--|--|--|--|--|--|--|--|--|--|--|--|--|--|--|--|--|--|--|--|--|--|--|--|--|--|--|--|--|--|--|--|--|--|--|--|--|--|--|--|--|--|--|--|--|--|--|--|--|--|--|--|--|--|--|--|--|--|--|--|--|--|--|--|--|--|--|--|--|--|--|--|--|--|--|--|--|--|--|--|--|--|--|--|--|--|--|--|--|--|--|--|--|--|--|--|--|--|--|--|--|--|--|--|--|--|--|--|--|--|--|--|--|--|--|--|--|--|--|--|--|--|--|--|--|--|--|--|--|--|--|--|--|--|--|--|--|--|--|--|--|--|--|--|--|--|--|--|--|--|--|--|--|--|--|--|--|--|--|--|--|--|--|--|--|--|--|--|--|--|--|--|--|--|--|--|--|--|--|--|--|--|--|--|--|--|--|--|--|--|--|--|--|--|--|--|--|--|--|--|--|--|--|--|--|--|--|--|--|--|--|--|--|--|--|--|--|--|--|--|--|--|--|--|--|--|--|--|--|--|--|--|--|--|--|--|--|--|--|--|--|--|--|--|--|--|--|--|--|--|--|--|--|--|--|--|--|--|--|--|--|--|--|--|--|--|--|--|--|--|--|--|--|--|--|--|--|--|--|--|--|--|--|--|--|--|--|--|--|--|--|--|--|--|--|--|--|--|--|--|--|--|--|--|--|--|--|--|--|--|--|--|--|--|--|--|--|--|--|--|--|--|--|--|--|--|--|--|--|--|--|--|--|--|--|--|--|--|--|--|--|--|--|--|--|--|--|--|--|--|--|--|--|--|--|--|--|--|--|--|--|--|--|--|--|--|--|--|--|--|--|--|--|--|--|--|--|--|--|--|--|--|--|--|--|--|--|--|--|--|--|--|--|--|--|--|--|--|--|--|--|--|--|--|--|--|--|--|--|--|--|--|--|--|--|--|--|--|--|--|--|--|--|--|--|--|--|--|--|--|--|--|--|--|--|--|--|--|--|--|--|--|--|--|--|--|--|--|--|--|--|--|--|--|--|--|--|--|--|--|--|--|--|--|--|--|--|--|--|--|--|--|--|--|--|--|--|--|--|--|--|--|--|--|--|--|--|--|--|--|--|--|--|--|--|--|--|--|--|--|--|--|--|--|--|--|--|--|--|--|--|--|--|--|--|--|--|--|--|--|--|--|--|--|--|--|--|--|--|--|--|--|--|--|--|--|--|--|--|--|--|--|--|--|--|--|--|--|--|--|--|--|--|--|--|--|--|--|--|--|--|--|--|--|----|

### Compound 3m

hnt DMSO {E:\bruk300\data\2011\Dec\} JMG 18

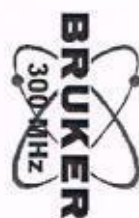

Compound 3o

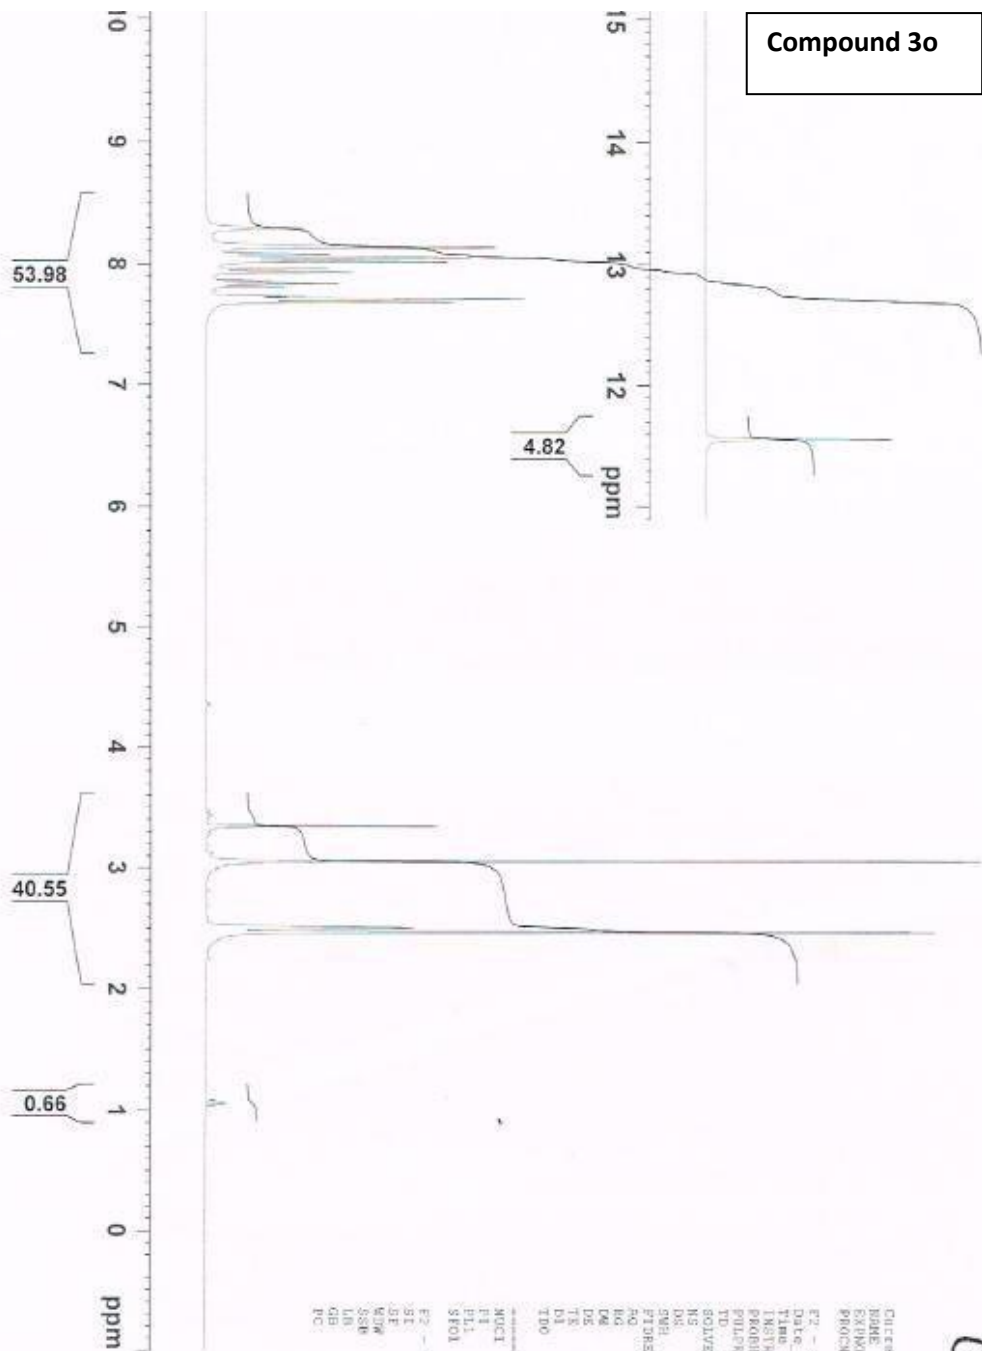

Current Data Parameters  
 NAME 2011-12-01-C05-18  
 DATE 2011-12-01  
 TIME 10:00  
 INSTRUM DMSO  
 PROBHD 5 mm DOL 13C-1  
 PULPROG zgpg30  
 TD 65536  
 FIDRES 0.094190 Hz  
 AQ 5.308460 sec  
 RG 456.1  
 DS 0  
 SFO 400.146 MHz  
 SOLVENT DMSO  
 NS 16  
 DS 0  
 SWH 6171.839 Hz  
 F1CHSE 0.094190 Hz  
 AQ 5.308460 sec  
 RG 456.1  
 DS 0  
 SFO 400.146 MHz  
 T1 1.500000 sec  
 T1R 0.1000000 sec  
 T1D 1

===== CHANNEL f1 =====  
 NUC1 1H  
 P1 10.00 usec  
 PL1 -2.00 dB  
 SFO1 299.9918521 MHz

F2 - Processing parameters  
 SI 32768  
 SF 299.9900000 MHz  
 WDW EM  
 SSB 0  
 LB 0.30 Hz  
 GB 0  
 PC 1.00

Compound 3o

Night DMSO {E:\bruk300data\2011Dec} JMG 18

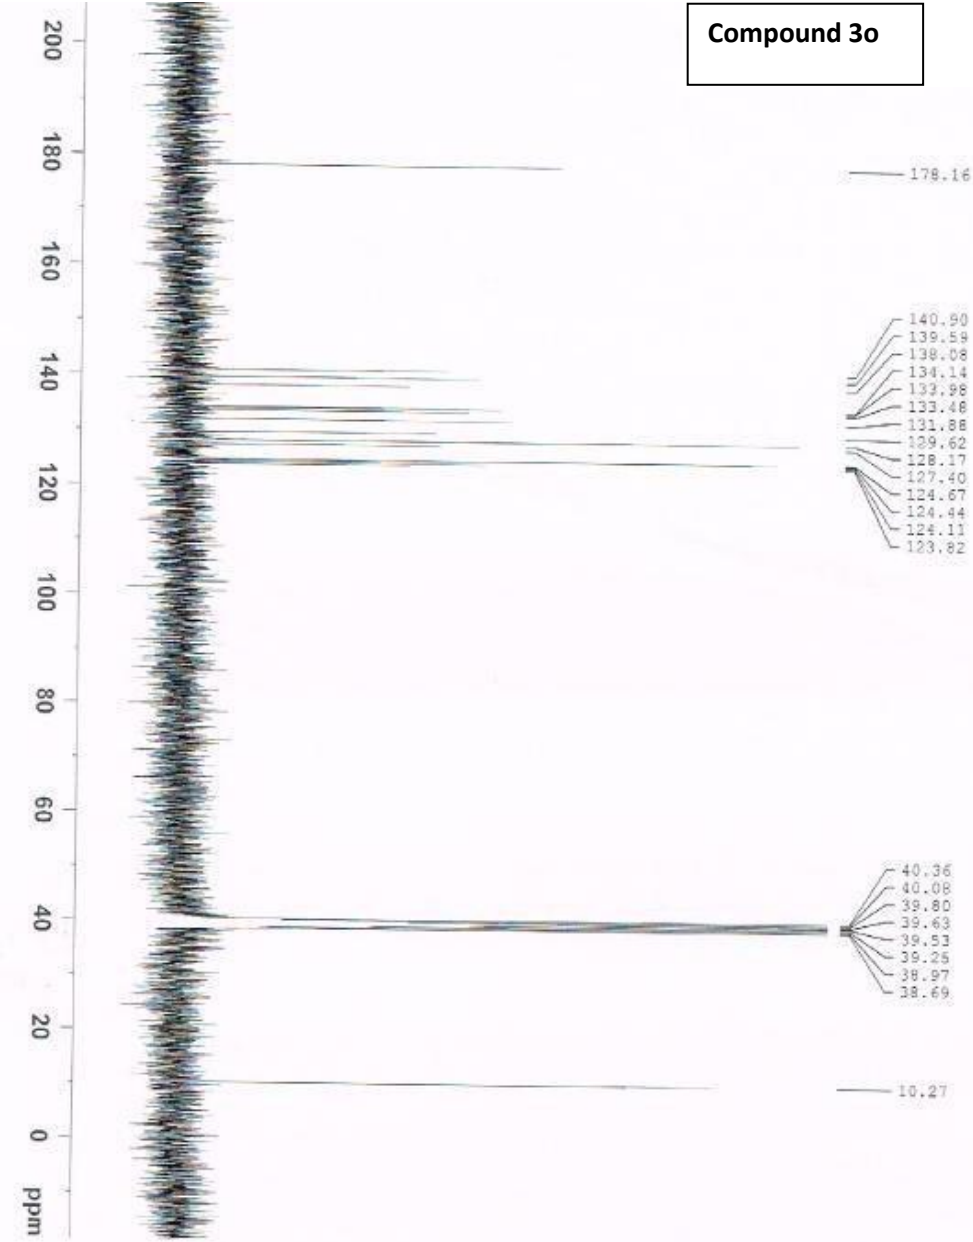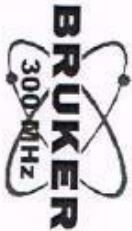

Current Data Parameters  
NAME 2011-12-07-JMG-18  
EXTNO 11  
PROCNO 1

F2 - Acquisition Parameters  
Date\_ 2011.12.10  
Time 9.03  
INSTRUM spect  
PROBHD 5 mm BBO 125-1  
PULPROG zgpg30  
TD 65536  
SOLVENT DMSO  
NS 1024  
DS 2  
SWH 17857.143 Hz  
FIDRES 0.272478 Hz  
AQ 1.8356580 sec  
RG 9195.2  
IN 28.000 umsc  
NUC 13C  
P1 10.00  
PC 1.00  
DELT 0.0300000 sec  
T1 1.0394529 sec  
T1RHO 1.0394529 sec  
T2 1.0394529 sec

Channel F1  
NUC1 13C  
P1 10.00 umsc  
PL1 -1.20 dB  
SFO1 75.480300 MHz

Channel F2  
NAME 2011.12.10  
INSTRUM spect  
PROBHD 5 mm BBO 125-1  
PULPROG zgpg30  
TD 65536  
SOLVENT DMSO  
NS 1024  
DS 2  
SWH 17857.143 Hz  
FIDRES 0.272478 Hz  
AQ 1.8356580 sec  
RG 9195.2  
IN 28.000 umsc  
NUC 13C  
P1 10.00  
PC 1.00  
DELT 0.0300000 sec  
T1 1.0394529 sec  
T1RHO 1.0394529 sec  
T2 1.0394529 sec

F2 - Processing parameters  
SI 32768  
SF 75.480300 MHz  
WDW EM  
SSB 0  
GB 0  
PC 1.00

# Elemental Composition Report

Compound 3o

Page 1

## Single Mass Analysis

Tolerance = 5.0 PPM / DBE: min = -1.5, max = 50.0

Isotope cluster parameters: Separation = 1.0 Abundance = 1.0%

Monoisotopic Mass, Odd and Even Electron Ions

525 formula(e) evaluated with 4 results within limits (all results (up to 1000) for each mass)

Aslan MTMS-15

1211470HzAFAMM 79 (1.301) Cm (78:89)

Cone= 30V

1: TOF MS ES

529

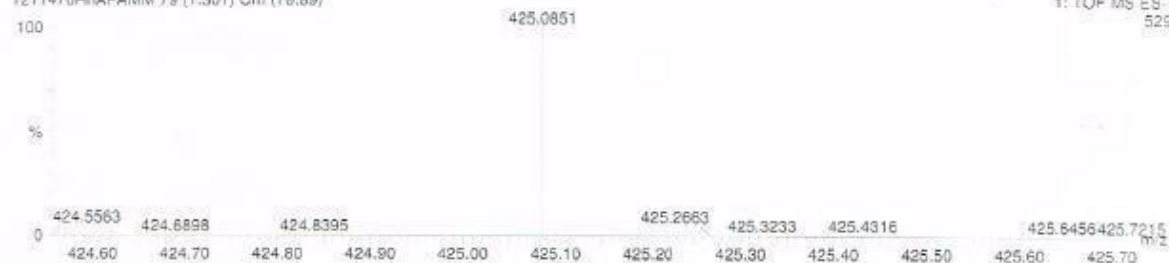

Minimum: 30.00  
Maximum: 100.00

200.0 5.0 -1.5  
50.0

| Mass     | RA     | Calc. Mass | mDa  | PPM  | DBE  | Score | Formula             |
|----------|--------|------------|------|------|------|-------|---------------------|
| 425.0851 | 100.00 | 425.0846   | 0.5  | 1.2  | 9.5  | n/a   | C18 H21 N2 O6 S2 +e |
|          |        | 425.0846   | 0.5  | 1.2  | 15.0 | n/a   | C17 H15 N9 O S2 +e  |
|          |        | 425.0859   | -0.8 | -2.0 | 14.5 | n/a   | C19 H17 N6 O2 S2 +e |
|          |        | 425.0833   | 1.8  | 4.3  | 10.0 | n/a   | C16 H19 N5 O5 S2 +e |

MTMS-16

Compound 4a

MTNS-16

Compound 4a

210



# Single Mass Analysis

Tolerance = 5.0 PPM / DBE: min = -1.5, max = 50.0  
Isotope cluster parameters: Separation = 1.0 Abundance = 1.0%

Compound 4a

Monoisotopic Mass, Odd and Even Electron Ions

1066 formula(e) evaluated with 6 results within limits (all results (up to 1000) for each mass)

aslam MTMS-16

1211629HnAFAMM 44 (0.702) Cm (43.52)

Cone= 30V  
1, TOF MS ES-  
894

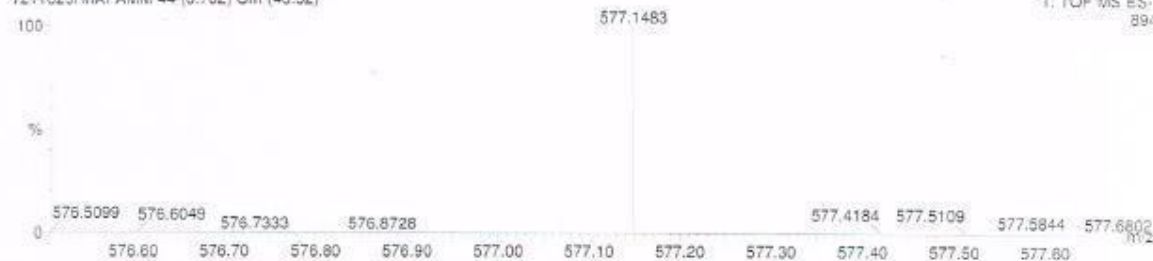

Minimum: 30.00  
Maximum: 100.00  
200.0 5.0 -1.5  
50.0

| Mass     | RA     | Calc. Mass | mDa  | PPM  | DBE  | Score | Formula             |
|----------|--------|------------|------|------|------|-------|---------------------|
| 577.1483 | 100.00 | 577.1485   | -0.2 | -0.4 | 22.5 | n/a   | C31 H25 N6 O2 S2 +e |
|          |        | 577.1472   | 1.1  | 1.9  | 17.5 | n/a   | C30 H29 N2 O6 S2 +e |
|          |        | 577.1472   | 1.1  | 1.9  | 23.0 | n/a   | C29 H23 N9 O S2 +e  |
|          |        | 577.1499   | -1.6 | -2.7 | 22.0 | n/a   | C33 H27 N3 O3 S2 +e |
|          |        | 577.1504   | -2.1 | -3.6 | 4.0  | n/a   | C20 H35 N O14 S2 +e |
|          |        | 577.1459   | 2.4  | 4.2  | 18.0 | n/a   | C28 H27 N5 O5 S2 +e |

MTMS-17  
mPROTONhigh

Compound 4b

15

10

2.17

MTMS-17  
mCARBO

Compound 4b

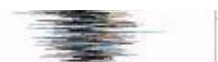

Tolerance = 5.0 PPM / DBE: min = -1.5, max = 50.0  
 Isotope cluster parameters: Separation = 1.0 Abundance = 1.0%

# Compound 4b

Monoisotopic Mass, Odd and Even Electron Ions  
 1066 formula(e) evaluated with 6 results within limits (all results (up to 1000) for each mass)

asiam MTMS-17  
 1211637HnAFAMM 43 (0.684) Cm (43.47)

Cone= 30V  
 1: TOF MS ES-  
 145

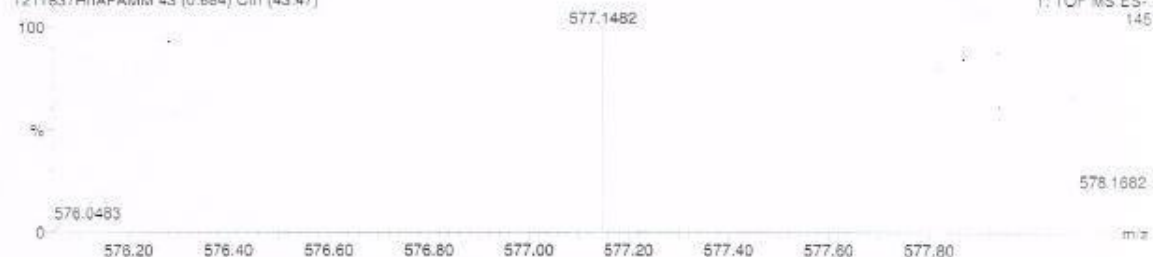

Minimum: 30.00  
 Maximum: 100.00

200.0 5.0  
 -1.5 50.0

| Mass     | RA     | Calc. Mass | mDa  | PPM  | DBE  | Score | Formula |     |    |     |    |    |
|----------|--------|------------|------|------|------|-------|---------|-----|----|-----|----|----|
| 577.1482 | 100.00 | 577.1485   | -0.3 | -0.6 | 22.5 | n/a   | C31     | H25 | N6 | O2  | S2 | +e |
|          |        | 577.1472   | 1.0  | 1.7  | 17.5 | n/a   | C30     | H29 | N2 | O6  | S2 | +e |
|          |        | 577.1472   | 1.0  | 1.7  | 23.0 | n/a   | C29     | H23 | N9 | O   | S2 | +e |
|          |        | 577.1499   | -1.7 | -2.9 | 22.0 | n/a   | C33     | H27 | N3 | O3  | S2 | +e |
|          |        | 577.1504   | -2.2 | -3.8 | 4.0  | n/a   | C20     | H35 | N  | O14 | S2 | +e |
|          |        | 577.1459   | 2.3  | 4.0  | 18.0 | n/a   | C28     | H27 | N5 | O5  | S2 | +e |

MTMS-20  
mPROTONic

Compound 4e

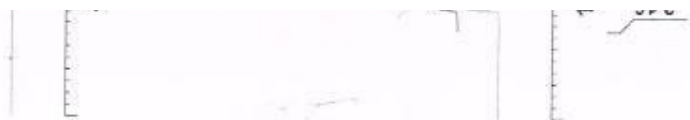

MTMS-20  
mCARBONn

Compound 4e

208.44

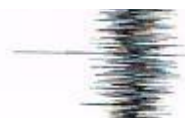

20



### Single Mass Analysis

Tolerance = 5.0 PPM / DBE: min = -1.5, max = 50.0

Isotope cluster parameters: Separation = 1.0 Abundance = 1.0%

Compound 4e

Monoisotopic Mass, Odd and Even Electron Ions

739 formula(e) evaluated with 3 results within limits (all results (up to 1000) for each mass)

asiam MTMS-20

112091HnAFAMM 44 (0.698) Cm (39:47)

Cone= 30V  
1: TOF MS ES-  
591.1614 58.4

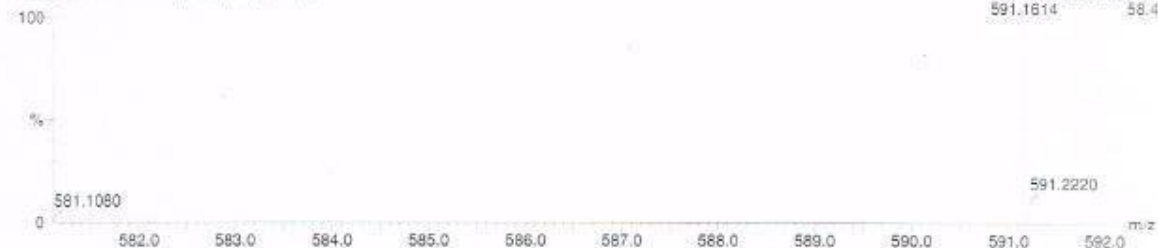

Minimum: 30.00  
Maximum: 100.00

200.0 5.0 -1.5  
50.0

| Mass     | RA     | Calc. Mass | mDa  | PPM  | DBE  | Score | Formula             |
|----------|--------|------------|------|------|------|-------|---------------------|
| 591.1614 | 100.00 | 591.1629   | -1.5 | -2.5 | 23.0 | n/a   | C30 H25 N9 O S2 +e  |
|          |        | 591.1629   | -1.5 | -2.5 | 17.5 | n/a   | C31 H31 N2 O6 S2 +e |
|          |        | 591.1642   | -2.8 | -4.7 | 22.5 | n/a   | C32 H27 N6 O2 S2 +e |

Compound 4g

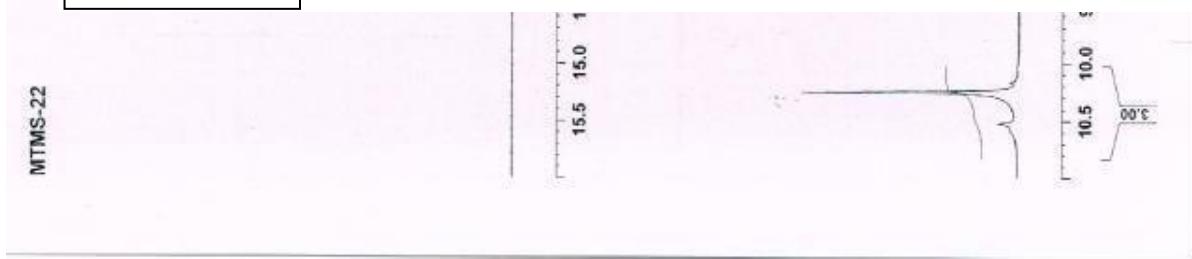

Isotope cluster parameters: Separation = 1.0 Abundance = 1.0%

Compound 4g

Monoisotopic Mass, Odd and Even Electron Ions

603 formula(e) evaluated with 2 results within limits (all results (up to 1000) for each mass)

asiam MTMS-22  
1211635HnAFAMM 48 (0.780) Cm (45.47)

Conew 30V  
1: TOF MS ES-  
14.9

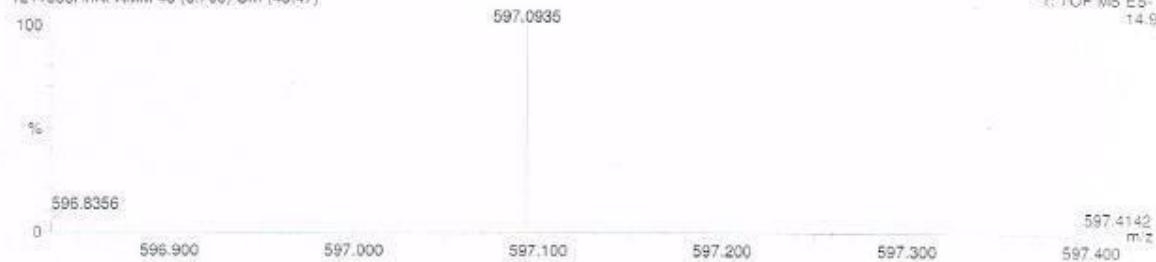

Minimum: 30.00  
Maximum: 100.00

| Mass     | RA     | Calc. Mass | mDa  | PPM  | DBE  | Score | Formula                 |
|----------|--------|------------|------|------|------|-------|-------------------------|
| 597.0935 | 100.00 | 597.0939   | -0.4 | -0.7 | 22.5 | n/a   | C30 H22 N6 O2 S2 Cl1 +e |
|          |        | 597.0953   | -1.8 | -3.0 | 22.0 | n/a   | C32 H24 N3 O3 S2 Cl1 +e |

| Mass     | RA     | Calc. Mass | mDa  | PPM  | DBE  | Score | Formula                 |
|----------|--------|------------|------|------|------|-------|-------------------------|
| 597.0935 | 100.00 | 597.0939   | -0.4 | -0.7 | 22.5 | n/a   | C30 H22 N6 O2 S2 Cl1 +e |
|          |        | 597.0953   | -1.8 | -3.0 | 22.0 | n/a   | C32 H24 N3 O3 S2 Cl1 +e |

MTMS-23  
mPROTONight D

Compound 4h

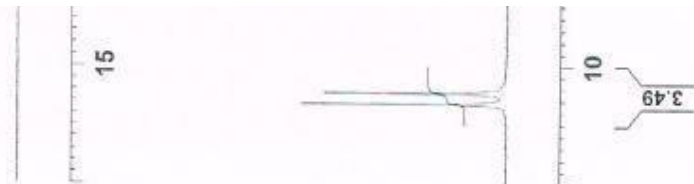

MTMS-23  
mCARBONn

Compound 4h

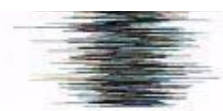

21

Tolerance = 5.0 PPM / DBE: min = -1.5, max = 50.0  
 Isotope cluster parameters: Separation = 1.0 Abundance = 1.0%

Compound 4h

Monoisotopic Mass, Odd and Even Electron Ions  
 603 formula(e) evaluated with 1 results within limits (all results (up to 1000) for each mass)

aslan MTMS-23  
 1211636HnAFAMM 85 (1.379) Cm (81:87)

Conc= 30V  
 1: TOF MS ES.  
 13.3

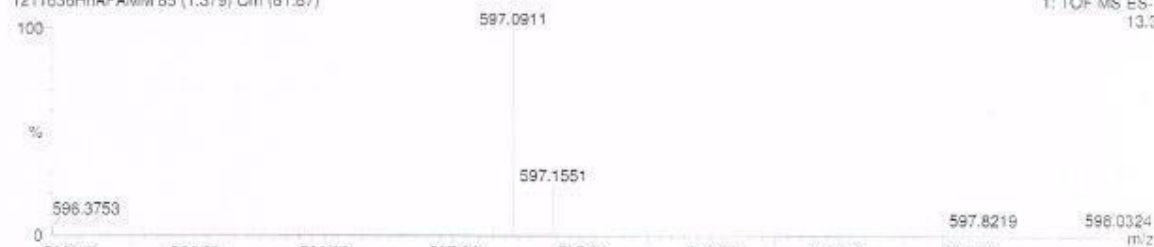

Minimum: 30.00  
 Maximum: 100.00  
 200.00 5.00 50.00

| Mass     | RA     | Calc. Mass | mDa  | PPM  | DBE  | Score | Formula         |
|----------|--------|------------|------|------|------|-------|-----------------|
| 597.0911 | 100.00 | 597.0939   | -2.8 | -4.7 | 22.5 | n/a   | C30H22N6O2S2Cl1 |



MTMS-26

15.5 15.0 1

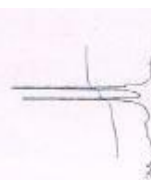

10.5 10.0 9

2.39

Compound 4k

MTWS-26

Compound 4k

210

### Single Mass Analysis

Tolerance = 5.0 PPM / DBE: min = -1.5, max = 50.0

Isotope cluster parameters: Separation = 1.0 Abundance = 1.0%

Compound 4k

Monoisotopic Mass, Odd and Even Electron Ions

603 formula(e) evaluated with 2 results within limits (all results (up to 1000) for each mass)

Asiam MTMS-26

1211471HnAFAMM 40 (0.647) Cm (37:43)

Cone= 30V  
1: TOF MS ES-  
19.6

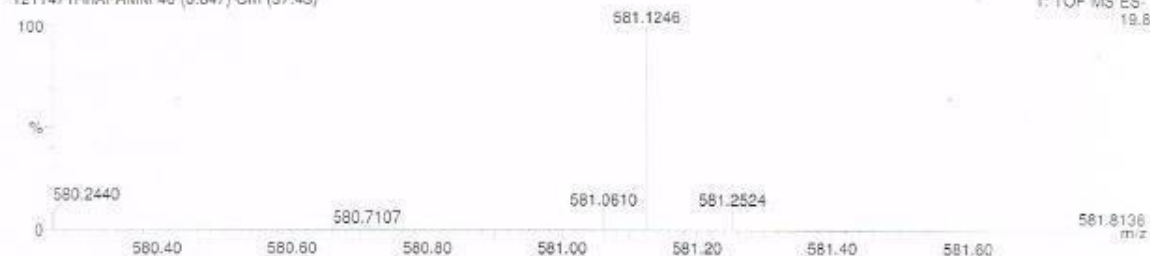

Minimum: 30.00  
Maximum: 100.00

200.0 5.0 -1.5  
50.0

| Mass     | RR     | Calc. Mass | mDa  | PPM  | DBE  | Score | Formula |     |    |    |    |       |
|----------|--------|------------|------|------|------|-------|---------|-----|----|----|----|-------|
| 581.1246 | 100.00 | 581.1248   | -0.2 | -0.4 | 22.0 | n/a   | C32     | H24 | N3 | O3 | S2 | F: +6 |
|          |        | 581.1235   | 1.1  | 1.9  | 22.5 | n/a   | C30     | H22 | N6 | O2 | S2 | P: +6 |

Compound 4l

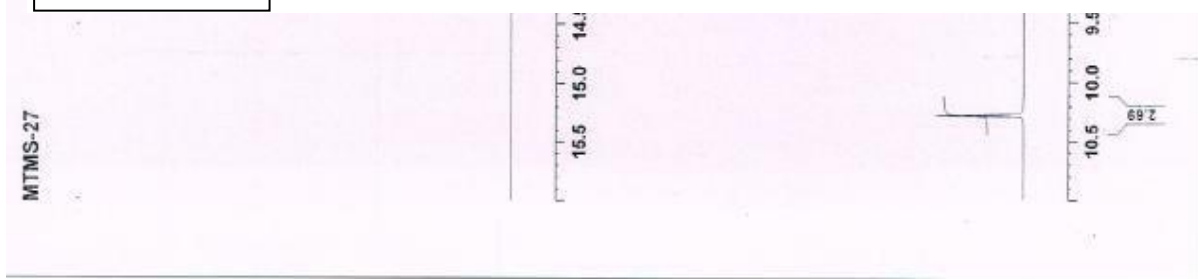

MTMS-27

Compound 4l

Maxfield  
240 230

NTMS-27

Compound 4l

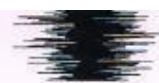

210



### Compound 4l

aslam MTMS-27  
1211631HnAFAMM 77 (1.237) Crt (75:78)

Cone= 30V  
1: TOF MS ES-  
11.6

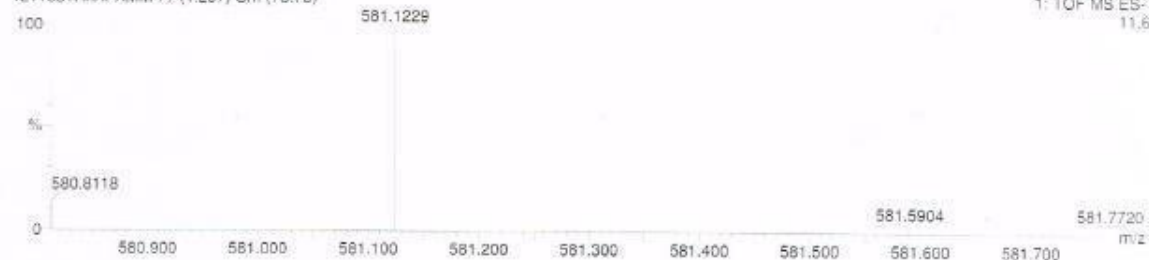

|          |       |  |  |  |      |  |  |  |  |  |  |  |  |  |  |  |  |  |  |  |  |  |  |  |  |  |  |  |  |  |  |  |  |  |  |  |  |  |  |  |  |  |  |  |  |  |  |  |  |  |  |  |  |  |  |  |  |  |  |  |  |  |  |  |  |  |  |  |  |  |  |  |  |  |  |  |  |  |  |  |  |  |  |  |  |  |  |  |  |  |  |  |  |  |  |  |  |  |  |  |  |  |  |  |  |  |  |  |  |  |  |  |  |  |  |  |  |  |  |  |  |  |  |  |  |  |  |  |  |  |  |  |  |  |  |  |  |  |  |  |  |  |  |  |  |  |  |  |  |  |  |  |  |  |  |  |  |  |  |  |  |  |  |  |  |  |  |  |  |  |  |  |  |  |  |  |  |  |  |  |  |  |  |  |  |  |  |  |  |  |  |  |  |  |  |  |  |  |  |  |  |  |  |  |  |  |  |  |  |  |  |  |  |  |  |  |  |  |  |  |  |  |  |  |  |  |  |  |  |  |  |  |  |  |  |  |  |  |  |  |  |  |  |  |  |  |  |  |  |  |  |  |  |  |  |  |  |  |  |  |  |  |  |  |  |  |  |  |  |  |  |  |  |  |  |  |  |  |  |  |  |  |  |  |  |  |  |  |  |  |  |  |  |  |  |  |  |  |  |  |  |  |  |  |  |  |  |  |  |  |  |  |  |  |  |  |  |  |  |  |  |  |  |  |  |  |  |  |  |  |  |  |  |  |  |  |  |  |  |  |  |  |  |  |  |  |  |  |  |  |  |  |  |  |  |  |  |  |  |  |  |  |  |  |  |  |  |  |  |  |  |  |  |  |  |  |  |  |  |  |  |  |  |  |  |  |  |  |  |  |  |  |  |  |  |  |  |  |  |  |  |  |  |  |  |  |  |  |  |  |  |  |  |  |  |  |  |  |  |  |  |  |  |  |  |  |  |  |  |  |  |  |  |  |  |  |  |  |  |  |  |  |  |  |  |  |  |  |  |  |  |  |  |  |  |  |  |  |  |  |  |  |  |  |  |  |  |  |  |  |  |  |  |  |  |  |  |  |  |  |  |  |  |  |  |  |  |  |  |  |  |  |  |  |  |  |  |  |  |  |  |  |  |  |  |  |  |  |  |  |  |  |  |  |  |  |  |  |  |  |  |  |  |  |  |  |  |  |  |  |  |  |  |  |  |  |  |  |  |  |  |  |  |  |  |  |  |  |  |  |  |  |  |  |  |  |  |  |  |  |  |  |  |  |  |  |  |  |  |  |  |  |  |  |  |  |  |  |  |  |  |  |  |  |  |  |  |  |  |  |  |  |  |  |  |  |  |  |  |  |  |  |  |  |  |  |  |  |  |  |  |  |  |  |  |  |  |  |  |  |  |  |  |  |  |  |  |  |  |  |  |  |  |  |  |  |  |  |  |  |  |  |  |  |  |  |  |  |  |  |  |  |  |  |  |  |  |  |  |  |  |  |  |  |  |  |  |  |  |  |  |  |  |  |  |  |  |  |  |  |  |  |  |  |  |  |  |  |  |  |  |  |  |  |  |  |  |  |  |  |  |  |  |  |  |  |  |  |  |  |  |  |  |  |  |  |  |  |  |  |  |  |  |  |  |  |  |  |  |  |  |  |  |  |  |  |  |  |  |  |  |  |  |  |  |  |  |  |  |  |  |  |  |  |  |  |  |  |  |  |  |  |  |  |  |  |  |  |  |  |  |  |  |  |  |  |  |  |  |  |  |  |  |  |  |  |  |  |  |  |  |  |  |  |  |  |  |  |  |  |  |  |  |  |  |  |  |  |  |  |  |  |  |  |  |  |  |  |  |  |  |  |  |  |  |  |  |  |  |  |  |  |  |  |  |  |  |  |  |  |  |  |  |  |  |  |  |  |  |  |  |  |  |  |  |  |  |  |  |  |  |  |  |  |  |  |  |  |  |  |  |  |  |  |  |  |  |  |  |  |  |  |  |  |  |  |  |  |  |  |  |  |  |  |  |  |  |  |  |  |  |  |  |  |  |  |  |  |  |  |  |  |  |  |  |  |  |  |  |  |  |  |  |  |  |  |  |  |  |  |  |  |  |  |  |  |  |  |  |  |  |  |  |  |  |  |  |  |  |  |  |  |  |  |  |  |  |  |  |  |  |  |  |  |  |  |  |  |  |  |  |  |  |  |  |  |  |  |  |  |  |  |  |  |  |  |  |  |  |  |  |  |  |  |  |  |  |  |  |  |  |  |  |  |  |  |  |  |  |  |  |  |  |  |  |  |  |  |  |  |  |  |  |  |  |  |  |  |  |  |  |  |  |  |  |  |  |  |  |  |  |  |  |  |  |  |  |  |  |  |  |  |  |  |  |  |  |  |  |  |  |  |  |  |  |  |  |  |  |  |  |  |  |  |  |  |  |  |  |  |  |  |  |  |  |  |  |  |  |  |  |  |  |  |  |  |  |  |  |  |  |  |  |  |  |  |  |  |  |  |  |  |  |  |  |  |  |  |  |  |  |  |  |  |  |  |  |  |  |  |  |  |  |  |  |  |  |  |  |  |  |  |  |  |  |  |  |  |  |  |  |  |  |  |  |  |  |  |  |  |  |  |  |  |  |  |  |  |  |  |  |  |  |  |  |  |  |  |  |  |  |  |  |  |  |  |  |  |  |  |  |  |  |  |  |  |  |  |  |  |  |  |  |  |  |  |  |  |  |  |  |  |  |  |  |  |  |  |  |  |  |  |  |  |  |  |  |  |  |  |  |  |  |  |  |  |  |  |  |  |  |  |  |  |  |  |  |  |  |  |  |  |  |  |  |  |  |  |  |  |  |  |  |  |  |  |  |  |  |  |  |  |  |  |  |  |  |  |  |  |  |  |  |  |  |  |  |  |  |  |  |  |  |  |  |  |  |  |  |  |  |  |  |  |  |  |  |  |  |  |  |  |  |  |  |  |  |  |  |  |  |  |  |  |  |  |  |  |  |  |  |  |  |  |  |  |  |  |  |  |  |  |  |  |  |  |  |  |  |  |  |  |  |  |  |  |  |  |  |  |  |  |  |  |  |  |  |  |  |  |  |  |  |  |  |  |  |  |  |  |  |  |  |  |  |  |  |  |  |  |  |  |  |  |  |  |  |  |  |  |  |  |  |  |  |  |  |  |  |  |  |  |  |  |  |  |  |  |  |  |  |  |  |  |  |  |  |  |  |  |  |  |  |  |  |  |  |  |  |  |  |  |  |  |  |  |  |  |  |  |  |  |  |  |  |  |  |  |  |  |  |  |  |  |  |  |  |  |  |  |  |  |  |  |  |  |  |  |  |  |  |  |  |  |  |  |  |  |  |  |  |  |  |  |  |  |  |  |  |  |  |  |  |  |  |  |  |  |  |  |  |  |  |  |  |  |  |  |  |  |  |  |  |  |  |  |  |  |  |  |  |  |  |  |  |  |  |  |  |  |  |  |  |  |  |  |  |  |  |  |  |  |  |  |  |  |  |  |  |  |  |  |  |  |  |  |  |  |  |  |  |  |  |  |  |  |  |  |  |  |  |  |  |  |  |  |  |  |  |  |  |  |  |  |  |  |  |  |  |  |  |  |  |  |  |  |  |  |  |  |  |  |  |  |  |  |  |  |  |  |  |  |  |  |  |  |  |  |  |  |  |  |  |  |  |  |  |  |  |  |  |  |  |  |  |  |  |  |  |  |  |  |  |  |  |  |  |  |  |  |  |  |  |  |  |  |  |  |  |  |  |  |  |  |  |  |  |  |  |  |  |  |  |  |  |  |  |  |  |  |  |  |  |  |  |  |  |  |  |  |  |  |  |  |  |  |  |  |  |  |  |  |  |  |  |  |  |  |  |  |  |  |  |  |  |  |  |  |  |  |  |  |  |  |  |  |  |  |  |  |  |  |  |  |  |  |  |  |  |  |  |  |  |  |  |  |  |  |  |  |  |  |  |  |  |  |  |  |  |  |  |  |  |  |  |  |  |  |  |  |  |  |  |  |  |  |  |  |  |  |  |  |  |  |  |  |  |  |  |  |  |  |  |  |  |  |  |  |  |  |  |  |  |  |  |  |  |  |  |  |  |  |  |  |  |  |  |  |  |  |  |  |  |
|----------|-------|--|--|--|------|--|--|--|--|--|--|--|--|--|--|--|--|--|--|--|--|--|--|--|--|--|--|--|--|--|--|--|--|--|--|--|--|--|--|--|--|--|--|--|--|--|--|--|--|--|--|--|--|--|--|--|--|--|--|--|--|--|--|--|--|--|--|--|--|--|--|--|--|--|--|--|--|--|--|--|--|--|--|--|--|--|--|--|--|--|--|--|--|--|--|--|--|--|--|--|--|--|--|--|--|--|--|--|--|--|--|--|--|--|--|--|--|--|--|--|--|--|--|--|--|--|--|--|--|--|--|--|--|--|--|--|--|--|--|--|--|--|--|--|--|--|--|--|--|--|--|--|--|--|--|--|--|--|--|--|--|--|--|--|--|--|--|--|--|--|--|--|--|--|--|--|--|--|--|--|--|--|--|--|--|--|--|--|--|--|--|--|--|--|--|--|--|--|--|--|--|--|--|--|--|--|--|--|--|--|--|--|--|--|--|--|--|--|--|--|--|--|--|--|--|--|--|--|--|--|--|--|--|--|--|--|--|--|--|--|--|--|--|--|--|--|--|--|--|--|--|--|--|--|--|--|--|--|--|--|--|--|--|--|--|--|--|--|--|--|--|--|--|--|--|--|--|--|--|--|--|--|--|--|--|--|--|--|--|--|--|--|--|--|--|--|--|--|--|--|--|--|--|--|--|--|--|--|--|--|--|--|--|--|--|--|--|--|--|--|--|--|--|--|--|--|--|--|--|--|--|--|--|--|--|--|--|--|--|--|--|--|--|--|--|--|--|--|--|--|--|--|--|--|--|--|--|--|--|--|--|--|--|--|--|--|--|--|--|--|--|--|--|--|--|--|--|--|--|--|--|--|--|--|--|--|--|--|--|--|--|--|--|--|--|--|--|--|--|--|--|--|--|--|--|--|--|--|--|--|--|--|--|--|--|--|--|--|--|--|--|--|--|--|--|--|--|--|--|--|--|--|--|--|--|--|--|--|--|--|--|--|--|--|--|--|--|--|--|--|--|--|--|--|--|--|--|--|--|--|--|--|--|--|--|--|--|--|--|--|--|--|--|--|--|--|--|--|--|--|--|--|--|--|--|--|--|--|--|--|--|--|--|--|--|--|--|--|--|--|--|--|--|--|--|--|--|--|--|--|--|--|--|--|--|--|--|--|--|--|--|--|--|--|--|--|--|--|--|--|--|--|--|--|--|--|--|--|--|--|--|--|--|--|--|--|--|--|--|--|--|--|--|--|--|--|--|--|--|--|--|--|--|--|--|--|--|--|--|--|--|--|--|--|--|--|--|--|--|--|--|--|--|--|--|--|--|--|--|--|--|--|--|--|--|--|--|--|--|--|--|--|--|--|--|--|--|--|--|--|--|--|--|--|--|--|--|--|--|--|--|--|--|--|--|--|--|--|--|--|--|--|--|--|--|--|--|--|--|--|--|--|--|--|--|--|--|--|--|--|--|--|--|--|--|--|--|--|--|--|--|--|--|--|--|--|--|--|--|--|--|--|--|--|--|--|--|--|--|--|--|--|--|--|--|--|--|--|--|--|--|--|--|--|--|--|--|--|--|--|--|--|--|--|--|--|--|--|--|--|--|--|--|--|--|--|--|--|--|--|--|--|--|--|--|--|--|--|--|--|--|--|--|--|--|--|--|--|--|--|--|--|--|--|--|--|--|--|--|--|--|--|--|--|--|--|--|--|--|--|--|--|--|--|--|--|--|--|--|--|--|--|--|--|--|--|--|--|--|--|--|--|--|--|--|--|--|--|--|--|--|--|--|--|--|--|--|--|--|--|--|--|--|--|--|--|--|--|--|--|--|--|--|--|--|--|--|--|--|--|--|--|--|--|--|--|--|--|--|--|--|--|--|--|--|--|--|--|--|--|--|--|--|--|--|--|--|--|--|--|--|--|--|--|--|--|--|--|--|--|--|--|--|--|--|--|--|--|--|--|--|--|--|--|--|--|--|--|--|--|--|--|--|--|--|--|--|--|--|--|--|--|--|--|--|--|--|--|--|--|--|--|--|--|--|--|--|--|--|--|--|--|--|--|--|--|--|--|--|--|--|--|--|--|--|--|--|--|--|--|--|--|--|--|--|--|--|--|--|--|--|--|--|--|--|--|--|--|--|--|--|--|--|--|--|--|--|--|--|--|--|--|--|--|--|--|--|--|--|--|--|--|--|--|--|--|--|--|--|--|--|--|--|--|--|--|--|--|--|--|--|--|--|--|--|--|--|--|--|--|--|--|--|--|--|--|--|--|--|--|--|--|--|--|--|--|--|--|--|--|--|--|--|--|--|--|--|--|--|--|--|--|--|--|--|--|--|--|--|--|--|--|--|--|--|--|--|--|--|--|--|--|--|--|--|--|--|--|--|--|--|--|--|--|--|--|--|--|--|--|--|--|--|--|--|--|--|--|--|--|--|--|--|--|--|--|--|--|--|--|--|--|--|--|--|--|--|--|--|--|--|--|--|--|--|--|--|--|--|--|--|--|--|--|--|--|--|--|--|--|--|--|--|--|--|--|--|--|--|--|--|--|--|--|--|--|--|--|--|--|--|--|--|--|--|--|--|--|--|--|--|--|--|--|--|--|--|--|--|--|--|--|--|--|--|--|--|--|--|--|--|--|--|--|--|--|--|--|--|--|--|--|--|--|--|--|--|--|--|--|--|--|--|--|--|--|--|--|--|--|--|--|--|--|--|--|--|--|--|--|--|--|--|--|--|--|--|--|--|--|--|--|--|--|--|--|--|--|--|--|--|--|--|--|--|--|--|--|--|--|--|--|--|--|--|--|--|--|--|--|--|--|--|--|--|--|--|--|--|--|--|--|--|--|--|--|--|--|--|--|--|--|--|--|--|--|--|--|--|--|--|--|--|--|--|--|--|--|--|--|--|--|--|--|--|--|--|--|--|--|--|--|--|--|--|--|--|--|--|--|--|--|--|--|--|--|--|--|--|--|--|--|--|--|--|--|--|--|--|--|--|--|--|--|--|--|--|--|--|--|--|--|--|--|--|--|--|--|--|--|--|--|--|--|--|--|--|--|--|--|--|--|--|--|--|--|--|--|--|--|--|--|--|--|--|--|--|--|--|--|--|--|--|--|--|--|--|--|--|--|--|--|--|--|--|--|--|--|--|--|--|--|--|--|--|--|--|--|--|--|--|--|--|--|--|--|--|--|--|--|--|--|--|--|--|--|--|--|--|--|--|--|--|--|--|--|--|--|--|--|--|--|--|--|--|--|--|--|--|--|--|--|--|--|--|--|--|--|--|--|--|--|--|--|--|--|--|--|--|--|--|--|--|--|--|--|--|--|--|--|--|--|--|--|--|--|--|--|--|--|--|--|--|--|--|--|--|--|--|--|--|--|--|--|--|--|--|--|--|--|--|--|--|--|--|--|--|--|--|--|--|--|--|--|--|--|--|--|--|--|--|--|--|--|--|--|--|--|--|--|--|--|--|--|--|--|--|--|--|--|--|--|--|--|--|--|--|--|--|--|--|--|--|--|--|--|--|--|--|--|--|--|--|--|--|--|--|--|--|--|--|--|--|--|--|--|--|--|--|--|--|--|--|--|--|--|--|--|--|--|--|--|--|--|--|--|--|--|--|--|--|--|--|--|--|--|--|--|--|--|--|--|--|--|--|--|--|--|--|--|--|--|--|--|--|--|--|--|--|--|--|--|--|--|--|--|--|--|--|--|--|--|--|--|--|--|--|--|--|--|--|--|--|--|--|--|--|--|--|--|--|--|--|--|--|--|--|--|--|--|--|--|--|--|--|--|--|--|--|--|--|--|--|--|--|--|--|--|--|--|--|--|--|--|--|--|--|--|--|--|--|--|--|--|--|--|--|--|--|--|--|--|--|--|--|--|--|--|--|--|--|--|--|--|--|--|--|--|--|--|--|--|--|--|--|--|--|--|--|--|--|--|--|--|--|--|--|--|--|--|--|--|--|--|--|--|--|--|--|--|--|--|--|--|--|--|--|--|--|--|--|--|--|--|--|--|--|--|--|--|--|--|--|--|--|--|--|--|--|--|--|--|--|--|--|--|--|--|--|--|--|--|--|--|--|--|--|--|--|--|--|--|--|--|--|--|--|--|--|--|--|--|--|
| Minimum: | 30.00 |  |  |  | -1.5 |  |  |  |  |  |  |  |  |  |  |  |  |  |  |  |  |  |  |  |  |  |  |  |  |  |  |  |  |  |  |  |  |  |  |  |  |  |  |  |  |  |  |  |  |  |  |  |  |  |  |  |  |  |  |  |  |  |  |  |  |  |  |  |  |  |  |  |  |  |  |  |  |  |  |  |  |  |  |  |  |  |  |  |  |  |  |  |  |  |  |  |  |  |  |  |  |  |  |  |  |  |  |  |  |  |  |  |  |  |  |  |  |  |  |  |  |  |  |  |  |  |  |  |  |  |  |  |  |  |  |  |  |  |  |  |  |  |  |  |  |  |  |  |  |  |  |  |  |  |  |  |  |  |  |  |  |  |  |  |  |  |  |  |  |  |  |  |  |  |  |  |  |  |  |  |  |  |  |  |  |  |  |  |  |  |  |  |  |  |  |  |  |  |  |  |  |  |  |  |  |  |  |  |  |  |  |  |  |  |  |  |  |  |  |  |  |  |  |  |  |  |  |  |  |  |  |  |  |  |  |  |  |  |  |  |  |  |  |  |  |  |  |  |  |  |  |  |  |  |  |  |  |  |  |  |  |  |  |  |  |  |  |  |  |  |  |  |  |  |  |  |  |  |  |  |  |  |  |  |  |  |  |  |  |  |  |  |  |  |  |  |  |  |  |  |  |  |  |  |  |  |  |  |  |  |  |  |  |  |  |  |  |  |  |  |  |  |  |  |  |  |  |  |  |  |  |  |  |  |  |  |  |  |  |  |  |  |  |  |  |  |  |  |  |  |  |  |  |  |  |  |  |  |  |  |  |  |  |  |  |  |  |  |  |  |  |  |  |  |  |  |  |  |  |  |  |  |  |  |  |  |  |  |  |  |  |  |  |  |  |  |  |  |  |  |  |  |  |  |  |  |  |  |  |  |  |  |  |  |  |  |  |  |  |  |  |  |  |  |  |  |  |  |  |  |  |  |  |  |  |  |  |  |  |  |  |  |  |  |  |  |  |  |  |  |  |  |  |  |  |  |  |  |  |  |  |  |  |  |  |  |  |  |  |  |  |  |  |  |  |  |  |  |  |  |  |  |  |  |  |  |  |  |  |  |  |  |  |  |  |  |  |  |  |  |  |  |  |  |  |  |  |  |  |  |  |  |  |  |  |  |  |  |  |  |  |  |  |  |  |  |  |  |  |  |  |  |  |  |  |  |  |  |  |  |  |  |  |  |  |  |  |  |  |  |  |  |  |  |  |  |  |  |  |  |  |  |  |  |  |  |  |  |  |  |  |  |  |  |  |  |  |  |  |  |  |  |  |  |  |  |  |  |  |  |  |  |  |  |  |  |  |  |  |  |  |  |  |  |  |  |  |  |  |  |  |  |  |  |  |  |  |  |  |  |  |  |  |  |  |  |  |  |  |  |  |  |  |  |  |  |  |  |  |  |  |  |  |  |  |  |  |  |  |  |  |  |  |  |  |  |  |  |  |  |  |  |  |  |  |  |  |  |  |  |  |  |  |  |  |  |  |  |  |  |  |  |  |  |  |  |  |  |  |  |  |  |  |  |  |  |  |  |  |  |  |  |  |  |  |  |  |  |  |  |  |  |  |  |  |  |  |  |  |  |  |  |  |  |  |  |  |  |  |  |  |  |  |  |  |  |  |  |  |  |  |  |  |  |  |  |  |  |  |  |  |  |  |  |  |  |  |  |  |  |  |  |  |  |  |  |  |  |  |  |  |  |  |  |  |  |  |  |  |  |  |  |  |  |  |  |  |  |  |  |  |  |  |  |  |  |  |  |  |  |  |  |  |  |  |  |  |  |  |  |  |  |  |  |  |  |  |  |  |  |  |  |  |  |  |  |  |  |  |  |  |  |  |  |  |  |  |  |  |  |  |  |  |  |  |  |  |  |  |  |  |  |  |  |  |  |  |  |  |  |  |  |  |  |  |  |  |  |  |  |  |  |  |  |  |  |  |  |  |  |  |  |  |  |  |  |  |  |  |  |  |  |  |  |  |  |  |  |  |  |  |  |  |  |  |  |  |  |  |  |  |  |  |  |  |  |  |  |  |  |  |  |  |  |  |  |  |  |  |  |  |  |  |  |  |  |  |  |  |  |  |  |  |  |  |  |  |  |  |  |  |  |  |  |  |  |  |  |  |  |  |  |  |  |  |  |  |  |  |  |  |  |  |  |  |  |  |  |  |  |  |  |  |  |  |  |  |  |  |  |  |  |  |  |  |  |  |  |  |  |  |  |  |  |  |  |  |  |  |  |  |  |  |  |  |  |  |  |  |  |  |  |  |  |  |  |  |  |  |  |  |  |  |  |  |  |  |  |  |  |  |  |  |  |  |  |  |  |  |  |  |  |  |  |  |  |  |  |  |  |  |  |  |  |  |  |  |  |  |  |  |  |  |  |  |  |  |  |  |  |  |  |  |  |  |  |  |  |  |  |  |  |  |  |  |  |  |  |  |  |  |  |  |  |  |  |  |  |  |  |  |  |  |  |  |  |  |  |  |  |  |  |  |  |  |  |  |  |  |  |  |  |  |  |  |  |  |  |  |  |  |  |  |  |  |  |  |  |  |  |  |  |  |  |  |  |  |  |  |  |  |  |  |  |  |  |  |  |  |  |  |  |  |  |  |  |  |  |  |  |  |  |  |  |  |  |  |  |  |  |  |  |  |  |  |  |  |  |  |  |  |  |  |  |  |  |  |  |  |  |  |  |  |  |  |  |  |  |  |  |  |  |  |  |  |  |  |  |  |  |  |  |  |  |  |  |  |  |  |  |  |  |  |  |  |  |  |  |  |  |  |  |  |  |  |  |  |  |  |  |  |  |  |  |  |  |  |  |  |  |  |  |  |  |  |  |  |  |  |  |  |  |  |  |  |  |  |  |  |  |  |  |  |  |  |  |  |  |  |  |  |  |  |  |  |  |  |  |  |  |  |  |  |  |  |  |  |  |  |  |  |  |  |  |  |  |  |  |  |  |  |  |  |  |  |  |  |  |  |  |  |  |  |  |  |  |  |  |  |  |  |  |  |  |  |  |  |  |  |  |  |  |  |  |  |  |  |  |  |  |  |  |  |  |  |  |  |  |  |  |  |  |  |  |  |  |  |  |  |  |  |  |  |  |  |  |  |  |  |  |  |  |  |  |  |  |  |  |  |  |  |  |  |  |  |  |  |  |  |  |  |  |  |  |  |  |  |  |  |  |  |  |  |  |  |  |  |  |  |  |  |  |  |  |  |  |  |  |  |  |  |  |  |  |  |  |  |  |  |  |  |  |  |  |  |  |  |  |  |  |  |  |  |  |  |  |  |  |  |  |  |  |  |  |  |  |  |  |  |  |  |  |  |  |  |  |  |  |  |  |  |  |  |  |  |  |  |  |  |  |  |  |  |  |  |  |  |  |  |  |  |  |  |  |  |  |  |  |  |  |  |  |  |  |  |  |  |  |  |  |  |  |  |  |  |  |  |  |  |  |  |  |  |  |  |  |  |  |  |  |  |  |  |  |  |  |  |  |  |  |  |  |  |  |  |  |  |  |  |  |  |  |  |  |  |  |  |  |  |  |  |  |  |  |  |  |  |  |  |  |  |  |  |  |  |  |  |  |  |  |  |  |  |  |  |  |  |  |  |  |  |  |  |  |  |  |  |  |  |  |  |  |  |  |  |  |  |  |  |  |  |  |  |  |  |  |  |  |  |  |  |  |  |  |  |  |  |  |  |  |  |  |  |  |  |  |  |  |  |  |  |  |  |  |  |  |  |  |  |  |  |  |  |  |  |  |  |  |  |  |  |  |  |  |  |  |  |  |  |  |  |  |  |  |  |  |  |  |  |  |  |  |  |  |  |  |  |  |  |  |  |  |  |  |  |  |  |  |  |  |  |  |  |  |  |  |  |  |  |  |  |  |  |  |  |  |  |  |  |  |  |  |  |  |  |  |  |  |  |  |  |  |  |  |  |  |  |  |  |  |  |  |  |  |  |  |  |  |  |  |  |  |  |  |  |  |  |  |  |  |  |  |  |  |  |  |  |  |  |  |  |  |  |  |  |  |  |  |  |  |  |  |  |  |  |  |  |  |  |  |  |  |  |  |  |  |  |  |  |  |  |  |  |
|----------|-------|--|--|--|------|--|--|--|--|--|--|--|--|--|--|--|--|--|--|--|--|--|--|--|--|--|--|--|--|--|--|--|--|--|--|--|--|--|--|--|--|--|--|--|--|--|--|--|--|--|--|--|--|--|--|--|--|--|--|--|--|--|--|--|--|--|--|--|--|--|--|--|--|--|--|--|--|--|--|--|--|--|--|--|--|--|--|--|--|--|--|--|--|--|--|--|--|--|--|--|--|--|--|--|--|--|--|--|--|--|--|--|--|--|--|--|--|--|--|--|--|--|--|--|--|--|--|--|--|--|--|--|--|--|--|--|--|--|--|--|--|--|--|--|--|--|--|--|--|--|--|--|--|--|--|--|--|--|--|--|--|--|--|--|--|--|--|--|--|--|--|--|--|--|--|--|--|--|--|--|--|--|--|--|--|--|--|--|--|--|--|--|--|--|--|--|--|--|--|--|--|--|--|--|--|--|--|--|--|--|--|--|--|--|--|--|--|--|--|--|--|--|--|--|--|--|--|--|--|--|--|--|--|--|--|--|--|--|--|--|--|--|--|--|--|--|--|--|--|--|--|--|--|--|--|--|--|--|--|--|--|--|--|--|--|--|--|--|--|--|--|--|--|--|--|--|--|--|--|--|--|--|--|--|--|--|--|--|--|--|--|--|--|--|--|--|--|--|--|--|--|--|--|--|--|--|--|--|--|--|--|--|--|--|--|--|--|--|--|--|--|--|--|--|--|--|--|--|--|--|--|--|--|--|--|--|--|--|--|--|--|--|--|--|--|--|--|--|--|--|--|--|--|--|--|--|--|--|--|--|--|--|--|--|--|--|--|--|--|--|--|--|--|--|--|--|--|--|--|--|--|--|--|--|--|--|--|--|--|--|--|--|--|--|--|--|--|--|--|--|--|--|--|--|--|--|--|--|--|--|--|--|--|--|--|--|--|--|--|--|--|--|--|--|--|--|--|--|--|--|--|--|--|--|--|--|--|--|--|--|--|--|--|--|--|--|--|--|--|--|--|--|--|--|--|--|--|--|--|--|--|--|--|--|--|--|--|--|--|--|--|--|--|--|--|--|--|--|--|--|--|--|--|--|--|--|--|--|--|--|--|--|--|--|--|--|--|--|--|--|--|--|--|--|--|--|--|--|--|--|--|--|--|--|--|--|--|--|--|--|--|--|--|--|--|--|--|--|--|--|--|--|--|--|--|--|--|--|--|--|--|--|--|--|--|--|--|--|--|--|--|--|--|--|--|--|--|--|--|--|--|--|--|--|--|--|--|--|--|--|--|--|--|--|--|--|--|--|--|--|--|--|--|--|--|--|--|--|--|--|--|--|--|--|--|--|--|--|--|--|--|--|--|--|--|--|--|--|--|--|--|--|--|--|--|--|--|--|--|--|--|--|--|--|--|--|--|--|--|--|--|--|--|--|--|--|--|--|--|--|--|--|--|--|--|--|--|--|--|--|--|--|--|--|--|--|--|--|--|--|--|--|--|--|--|--|--|--|--|--|--|--|--|--|--|--|--|--|--|--|--|--|--|--|--|--|--|--|--|--|--|--|--|--|--|--|--|--|--|--|--|--|--|--|--|--|--|--|--|--|--|--|--|--|--|--|--|--|--|--|--|--|--|--|--|--|--|--|--|--|--|--|--|--|--|--|--|--|--|--|--|--|--|--|--|--|--|--|--|--|--|--|--|--|--|--|--|--|--|--|--|--|--|--|--|--|--|--|--|--|--|--|--|--|--|--|--|--|--|--|--|--|--|--|--|--|--|--|--|--|--|--|--|--|--|--|--|--|--|--|--|--|--|--|--|--|--|--|--|--|--|--|--|--|--|--|--|--|--|--|--|--|--|--|--|--|--|--|--|--|--|--|--|--|--|--|--|--|--|--|--|--|--|--|--|--|--|--|--|--|--|--|--|--|--|--|--|--|--|--|--|--|--|--|--|--|--|--|--|--|--|--|--|--|--|--|--|--|--|--|--|--|--|--|--|--|--|--|--|--|--|--|--|--|--|--|--|--|--|--|--|--|--|--|--|--|--|--|--|--|--|--|--|--|--|--|--|--|--|--|--|--|--|--|--|--|--|--|--|--|--|--|--|--|--|--|--|--|--|--|--|--|--|--|--|--|--|--|--|--|--|--|--|--|--|--|--|--|--|--|--|--|--|--|--|--|--|--|--|--|--|--|--|--|--|--|--|--|--|--|--|--|--|--|--|--|--|--|--|--|--|--|--|--|--|--|--|--|--|--|--|--|--|--|--|--|--|--|--|--|--|--|--|--|--|--|--|--|--|--|--|--|--|--|--|--|--|--|--|--|--|--|--|--|--|--|--|--|--|--|--|--|--|--|--|--|--|--|--|--|--|--|--|--|--|--|--|--|--|--|--|--|--|--|--|--|--|--|--|--|--|--|--|--|--|--|--|--|--|--|--|--|--|--|--|--|--|--|--|--|--|--|--|--|--|--|--|--|--|--|--|--|--|--|--|--|--|--|--|--|--|--|--|--|--|--|--|--|--|--|--|--|--|--|--|--|--|--|--|--|--|--|--|--|--|--|--|--|--|--|--|--|--|--|--|--|--|--|--|--|--|--|--|--|--|--|--|--|--|--|--|--|--|--|--|--|--|--|--|--|--|--|--|--|--|--|--|--|--|--|--|--|--|--|--|--|--|--|--|--|--|--|--|--|--|--|--|--|--|--|--|--|--|--|--|--|--|--|--|--|--|--|--|--|--|--|--|--|--|--|--|--|--|--|--|--|--|--|--|--|--|--|--|--|--|--|--|--|--|--|--|--|--|--|--|--|--|--|--|--|--|--|--|--|--|--|--|--|--|--|--|--|--|--|--|--|--|--|--|--|--|--|--|--|--|--|--|--|--|--|--|--|--|--|--|--|--|--|--|--|--|--|--|--|--|--|--|--|--|--|--|--|--|--|--|--|--|--|--|--|--|--|--|--|--|--|--|--|--|--|--|--|--|--|--|--|--|--|--|--|--|--|--|--|--|--|--|--|--|--|--|--|--|--|--|--|--|--|--|--|--|--|--|--|--|--|--|--|--|--|--|--|--|--|--|--|--|--|--|--|--|--|--|--|--|--|--|--|--|--|--|--|--|--|--|--|--|--|--|--|--|--|--|--|--|--|--|--|--|--|--|--|--|--|--|--|--|--|--|--|--|--|--|--|--|--|--|--|--|--|--|--|--|--|--|--|--|--|--|--|--|--|--|--|--|--|--|--|--|--|--|--|--|--|--|--|--|--|--|--|--|--|--|--|--|--|--|--|--|--|--|--|--|--|--|--|--|--|--|--|--|--|--|--|--|--|--|--|--|--|--|--|--|--|--|--|--|--|--|--|--|--|--|--|--|--|--|--|--|--|--|--|--|--|--|--|--|--|--|--|--|--|--|--|--|--|--|--|--|--|--|--|--|--|--|--|--|--|--|--|--|--|--|--|--|--|--|--|--|--|--|--|--|--|--|--|--|--|--|--|--|--|--|--|--|--|--|--|--|--|--|--|--|--|--|--|--|--|--|--|--|--|--|--|--|--|--|--|--|--|--|--|--|--|--|--|--|--|--|--|--|--|--|--|--|--|--|--|--|--|--|--|--|--|--|--|--|--|--|--|--|--|--|--|--|--|--|--|--|--|--|--|--|--|--|--|--|--|--|--|--|--|--|--|--|--|--|--|--|--|--|--|--|--|--|--|--|--|--|--|--|--|--|--|--|--|--|--|--|--|--|--|--|--|--|--|--|--|--|--|--|--|--|--|--|--|--|--|--|--|--|--|--|--|--|--|--|--|--|--|--|--|--|--|--|--|--|--|--|--|--|--|--|--|--|--|--|--|--|--|--|--|--|--|--|--|--|--|--|--|--|--|--|--|--|--|--|--|--|--|--|--|--|--|--|--|--|--|--|--|--|--|--|--|--|--|--|--|--|--|--|--|--|--|--|--|--|--|--|--|--|--|--|--|--|--|--|--|--|--|--|--|--|--|--|--|--|--|--|--|--|--|--|--|--|--|--|--|--|--|--|--|--|--|--|--|--|--|--|--|--|--|--|--|--|--|--|--|--|--|--|--|--|--|--|--|--|--|--|--|--|--|--|--|--|--|--|--|--|--|--|--|--|

MTMS-28  
mPROTONiQ

Compound 4m

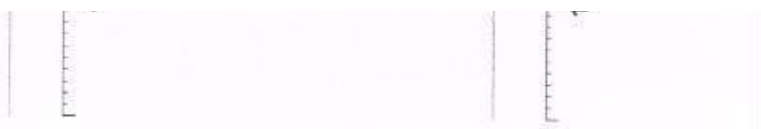

MTMS-28  
mCARBO

Compound 4m

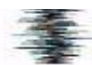

Tolerance = 5.0 PPM / DBE: min = -1.5, max = 50.0  
 Isotope cluster parameters: Separation = 1.0 Abundance = 1.0%

Compound 4m

Monoisotopic Mass, Odd and Even Electron Ions  
 1066 formula(e) evaluated with 6 results within limits (all results (up to 1000) for each mass)

asiam MTMS-28  
 1211630HnAFAMM 93 (1.516) Cm (92:99)

Conc= 30V  
 1: TOF MS ES+  
 17.4

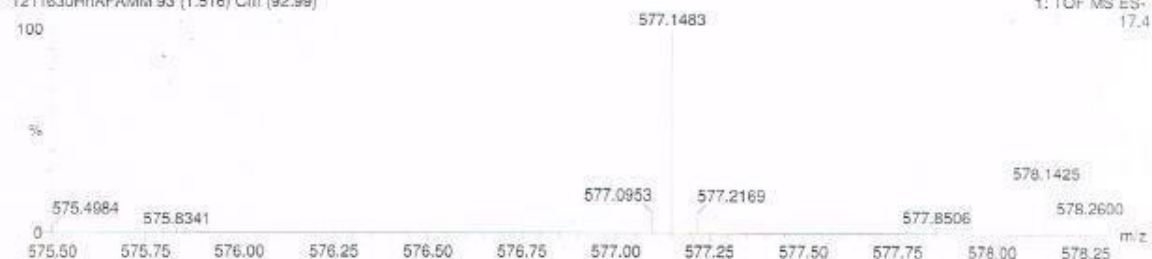

Minimum: 30.00  
 Maximum: 100.00

200.0 5.0 -1.5  
 50.0

| Mass     | RA     | Calc. Mass | mDa  | PPM  | DBE  | Score | Formula             |
|----------|--------|------------|------|------|------|-------|---------------------|
| 577.1483 | 100.00 | 577.1485   | -0.2 | -0.4 | 22.5 | n/a   | C31 H25 N6 O2 S2 +e |
|          |        | 577.1472   | 1.1  | 1.9  | 17.5 | n/a   | C30 H29 N2 O6 S2 +e |
|          |        | 577.1472   | 1.1  | 1.9  | 23.0 | n/a   | C29 H23 N9 O S2 +e  |
|          |        | 577.1499   | -1.6 | -2.7 | 22.0 | n/a   | C33 H27 N3 O3 S2 +e |
|          |        | 577.1504   | -2.1 | -3.6 | 4.0  | n/a   | C20 H35 N O14 S2 +e |
|          |        | 577.1459   | 2.4  | 4.2  | 18.0 | n/a   | C28 H27 N5 O5 S2 +e |
